# Supplementary material for: Every fifth published metagenome is not available to science
Source: PLoS Biol. 2020 Apr 3;18(4):e3000698. doi: 10.1371/journal.pbio.3000698 (PMC7159239; doi:10.1371/journal.pbio.3000698)
Supplement: S2 Data — It contains the 1,269 papers that passed the filtering steps of our literature survey on papers published between 2016 and 2019. (XLSX) [file pbio.3000698.s003.xlsx]

## Sheet: appendix
ID	SO	PY	DI	DB available	type of no	type of no - for us	Repository	link	notes
1531	BIOTECHNOLOGY FOR BIOFUELS	2018	10.1186/s13068-018-1214-9	no	inexistent access	inexistent access	JGI		codes do not exist: 142919, Ga0206072
5719	SCIENCE OF THE TOTAL ENVIRONMENT	2016	10.1016/j.scitotenv.2016.03.141	no	inexistent access	inexistent access	MG-RAST		codes do not exist: 4488272.3 and 4488273.3
5333	SCIENTIFIC REPORTS	2016	10.1038/srep34155	no	inexistent access	inexistent access	MG-RAST		codes do not exist: 11495, 4601569.3, 4601618.3, 4601557.3, etc.
3689	BIOTECHNOLOGY FOR BIOFUELS	2017	10.1186/s13068-017-0885-y	no	inexistent access	inexistent access	MG-RAST		codes do not exist: 117466 and mgs566360
3340	WATER RESEARCH	2017	10.1016/j.watres.2017.07.060	no	inexistent access	inexistent access	MG-RAST		codes do not exist: 19878
6145	BMC MICROBIOLOGY	2016	10.1186/s12866-016-0669-8	no	inexistent access	inexistent access	MG-RAST		codes do not exist: 4508969.3, 4516462.3, 4515485.3, 4512472.3
3249	MBIO	2017	10.1128/mBio.01809-17	no	inexistent access	inexistent access	MG-RAST		codes do not exist: 4511045 to 4511050, 4511060 to 4511065, 4511111 to 4511116, 4511134 to 4511153, and 4511178 to 4511193
5474	BIORESOURCE TECHNOLOGY	2016	10.1016/j.biortech.2016.06.021	no	inexistent access	inexistent access	MG-RAST		codes do not exist: 4530134.3, 4573652.3, 4573660.3
5738	ENVIRONMENTAL SCIENCE & TECHNOLOGY	2016	10.1021/acs.est.6b00247	no	inexistent access	inexistent access	MG-RAST		codes do not exist: 4548731.3–4548734.3
6405	FRONTIERS IN MICROBIOLOGY	2016	10.3389/fmicb.2015.01438	no	inexistent access	inexistent access	MG-RAST		codes do not exist: 4550933.3, 4550934.3, 4551435.3, 4551436.3, 4551437.3, 4551749.3
2616	MICROBIOLOGYOPEN	2018	10.1002/mbo3.548	no	inexistent access	inexistent access	MG-RAST		codes do not exist: 4552009.3, 4552010.3, 4552011.3, 4552006.3, 4552007.3, 4552008.3, 4552012.3, 4552013.3, 4553069.3
5627	3 BIOTECH	2016	10.1007/s13205-016-0471-1	no	inexistent access	inexistent access	MG-RAST		codes do not exist: 4556318.3
4001	MICROBIAL ECOLOGY	2017	10.1007/s00248-016-0911-9	no	inexistent access	inexistent access	MG-RAST		codes do not exist: 4566398.3, 4566399.3, 4567013.3, 4566680.3, and 4566739.3
5696	APPLIED MICROBIOLOGY AND BIOTECHNOLOGY	2016	10.1007/s00253-016-7604-7	no	inexistent access	inexistent access	MG-RAST		codes do not exist: 4570968.3, 4570967.3, 4570966.3, 4570965.3, 4539081.3, 4539082.3, 4539083.3, 4561639.3, 4561640.3, 4561641.3, 4561642.3, 4561643.3, 4561644.3, 4561645.3, and 4561646.3
6443	ENVIRONMENTAL SCIENCE & TECHNOLOGY	2016	10.1021/acs.est.5b03522	no	inexistent access	inexistent access	MG-RAST		codes do not exist: 4572808.3–4572813.3
1299	BMC GENOMICS	2018	10.1186/s12864-018-5064-4	no	inexistent access	inexistent access	MG-RAST		codes do not exist: 4585168.3, 4585169.3, 4585170.3, 4585171.3, 4585172.3, 4585173.3, 4585174.3, 4585175.3, 4585176.3, 4585177.3, 4585178.3, 4585179.3, 4585180.3, 4585181.3, 4585182.3, 4585183.3, 4587441.3, 4587442.3, 4587443.3, 4587444.3, 4587445.3, 4587446.3, 4587447.3, 4587448.3, 4587449.3, 4587450.3, 4587451.3, 4587452.3. "
3339	WATER RESEARCH	2017	10.1016/j.watres.2017.07.061	no	inexistent access	inexistent access	MG-RAST		codes do not exist: 4616410.3, 4615326.3, 4615992.3, 4615825.3, 4616810.3, 4616093.3, 4615898.3, 4615107.3, 4614730.3, 4614971.3, 4615156.3, 4616411.3, 4615017.3, 4615106.3, 4615521.3, 4615157.3, 4615176.3, 4615184.3, 4616818.3, 4615216.3, 4615659.3
1322	CHEMICAL ENGINEERING JOURNAL	2018	10.1016/j.cej.2018.04.202	no	inexistent access	inexistent access	MG-RAST		codes do not exist: 4620719.3
6210	FEMS MICROBIOLOGY ECOLOGY	2016	10.1093/femsec/fiw022	no	inexistent access	inexistent access	MG-RAST		codes do not exist: 4629524.3 to 4629541.3, 4629542.3 to 4629559.3, 4629560.3 to 4629579.3
1269	CHEMOSPHERE	2018	10.1016/j.chemosphere.2018.06.068	no	inexistent access	inexistent access	MG-RAST		codes do not exist: 4643476.3
1751	SYSTEMATIC AND APPLIED MICROBIOLOGY	2018	10.1016/j.syapm.2018.02.002	no	inexistent access	inexistent access	MG-RAST		codes do not exist: 4663640.3
983	FEMS MICROBIOLOGY ECOLOGY	2018	10.1093/femsec/fiy173	no	inexistent access	inexistent access	MG-RAST		codes do not exist: 4681809.3, 4681806.3, 4681808.3, and 4681807.3
1837	FRONTIERS IN MICROBIOLOGY	2018	10.3389/fmicb.2018.01393	no	inexistent access	inexistent access	MG-RAST		codes do not exist: 4696532.3, 4696533.3, 4696534.3, 4696535.3, 4696536.3, 4696537.3, 4696538.3, 4696539.3, 4696540.3, 4696541.3, 4696542.3, 4696543.3, 4696545.3, 4696546.3, 4696547.3, 4696549.3, 4696551.3, 4696553.3, 4696555.3, 4696556.3, 4696557.3, 4696558.3, 4696559.3, 4696560.3, 4696561.3, 4696563.3, 4696564.3, 4696565.3, 4696566.3, 4696567.3, 4696568.3, 4696569.3, 4696570.3, 4696571.3, 46965…
2528	BIOTECHNOLOGY FOR BIOFUELS	2018	10.1186/s13068-018-1042-y	no	inexistent access	inexistent access	MG-RAST		codes do not exist: 4714949, 4714944, 4714952, 471497, etc.
3421	FEMS MICROBIOLOGY ECOLOGY	2017	10.1093/femsec/fix109	no	inexistent access	inexistent access	MG-RAST		codes do not exist: 5426
1381	WATER RESEARCH	2018	10.1016/j.watres.2018.04.043	no	inexistent access	inexistent access	MG-RAST		codes do not exist: 6474
3877	SCIENCE OF THE TOTAL ENVIRONMENT	2017	10.1016/j.scitotenv.2017.01.213	no	inexistent access	inexistent access	MG-RAST		codes do not exist: ID20345
3191	ENVIRONMENTAL SCIENCE & TECHNOLOGY	2017	10.1021/acs.est.7b03975	no	inexistent access	inexistent access	MG-RAST		codes do not exist: mgm4632721.3
69	SCIENTIFIC REPORTS	2019	10.1038/s41598-019-41882-y	no	inexistent access	inexistent access	MG-RAST		codes do not exist: mgp19402, mgp19415
2148	WATER RESEARCH	2018	10.1016/j.watres.2018.01.063	no	inexistent access	inexistent access	MG-RAST		codes do not exist: mgp21084
300	ENVIRONMENTAL POLLUTION	2019	10.1016/j.envpol.2018.12.022	no	inexistent access	inexistent access	MG-RAST		codes do not exist: mgp83396
2095	ENVIRONMENTAL SCIENCE AND POLLUTION RESEARCH	2018	10.1007/s11356-018-1598-x	no	inexistent access	inexistent access	NCBI/ENA/DDBJ		"Metagenomic data were deposited in the NCBI Short Read Archive"
3863	BMC MICROBIOLOGY	2017	10.1186/s12866-017-1059-6	no	inexistent access	inexistent access	NCBI/ENA/DDBJ		"Primary data sets are provided as Supplemental Materials, as described in the text." These are however not sequences.
2525	BIOTECHNOLOGY FOR BIOFUELS	2018	10.1186/s13068-018-1036-9	no	inexistent access	inexistent access	NCBI/ENA/DDBJ		"The datasets generated and analyzed during the current study are available in the MG-RAST repository with identification numbers described in Additional file 9 [THEY DO NOT EXIST]. European Nucleotide Archive study accession number X. Draft bacterial genomes are available in NCBI (released upon publication)."
1498	PLOS ONE	2018	10.1371/journal.pone.0202049	no	inexistent access	inexistent access	NCBI/ENA/DDBJ		codes do not exist: DRR138887 to DRR138913
3684	FRONTIERS IN CELLULAR AND INFECTION MICROBIOLOGY	2017	10.3389/fcimb.2017.00381	no	inexistent access	inexistent access	NCBI/ENA/DDBJ		codes do not exist: ERP023883
6422	GENE	2016	10.1016/j.gene.2015.10.006	no	inexistent access	inexistent access	NCBI/ENA/DDBJ		codes do not exist: FJ5444454.1
815	VIROLOGY	2018	10.1016/j.virol.2018.09.008	no	inexistent access	inexistent access	NCBI/ENA/DDBJ		codes do not exist: MH425583, MH425590
142	INTERNATIONAL JOURNAL OF BIOLOGICAL MACROMOLECULES	2019	10.1016/j.ijbiomac.2018.12.041	no	inexistent access	inexistent access	NCBI/ENA/DDBJ		codes do not exist: MH685571
3210	SCIENTIFIC REPORTS	2017	10.1038/s41598-017-15650-9	no	inexistent access	inexistent access	NCBI/ENA/DDBJ		codes do not exist: PRJEB21167
327	SCIENCE OF THE TOTAL ENVIRONMENT	2019	10.1016/j.scitotenv.2018.10.409	no	inexistent access	inexistent access	NCBI/ENA/DDBJ		codes do not exist: PRJEB26614
349	SCIENTIFIC REPORTS	2019	10.1038/s41598-019-39700-6	no	inexistent access	inexistent access	NCBI/ENA/DDBJ		codes do not exist: PRJEB26800, ERS2487953 to ERS2488036
114	ENVIRONMENTAL MICROBIOLOGY REPORTS	2019	10.1111/1758-2229.12724	no	inexistent access	inexistent access	NCBI/ENA/DDBJ		codes do not exist: PRJEB27888
2321	CHEMOSPHERE	2018	10.1016/j.chemosphere.2018.01.102	no	inexistent access	inexistent access	NCBI/ENA/DDBJ		codes do not exist: PRJNA353027, PRJNA353040
177	SCIENCE OF THE TOTAL ENVIRONMENT	2019	10.1016/j.scitotenv.2018.11.442	no	inexistent access	inexistent access	NCBI/ENA/DDBJ		codes do not exist: PRJNA39461
2149	WATER RESEARCH	2018	10.1016/j.watres.2018.02.001	no	inexistent access	inexistent access	NCBI/ENA/DDBJ		codes do not exist: PRJNA394669, SAMN07367931-SAMN07367939
538	MICROBIOME	2019	10.1186/s40168-019-0618-5	no	inexistent access	inexistent access	NCBI/ENA/DDBJ		codes do not exist: PRJNA448333
730	FRONTIERS IN MICROBIOLOGY	2018	10.3389/fmicb.2018.03138	no	inexistent access	inexistent access	NCBI/ENA/DDBJ		codes do not exist: PRJNA477424, SRP154209
750	FRONTIERS IN CELLULAR AND INFECTION MICROBIOLOGY	2018	10.3389/fcimb.2018.00433	no	inexistent access	inexistent access	NCBI/ENA/DDBJ		codes do not exist: PRJNA490628
182	PLOS ONE	2019	10.1371/journal.pone.0213384	no	inexistent access	inexistent access	NCBI/ENA/DDBJ		codes do not exist: PRJNA494526
995	VIRUSES-BASEL	2018	10.3390/v10110633	no	inexistent access	inexistent access	NCBI/ENA/DDBJ		codes do not exist: PRJNA504035
68	FRONTIERS IN MICROBIOLOGY	2019	10.3389/fmicb.2019.00594	no	inexistent access	inexistent access	NCBI/ENA/DDBJ		codes do not exist: PRJNA506750
267	3 BIOTECH	2019	10.1007/s13205-019-1621-z	no	inexistent access	inexistent access	NCBI/ENA/DDBJ		codes do not exist: PRJNA517605
172	MICROBIOME	2019	10.1186/s40168-019-0663-0	no	inexistent access	inexistent access	NCBI/ENA/DDBJ		codes do not exist: SAMN09603371-SAMN09603381 and PRJNA505617
4240	MICROBIAL ECOLOGY	2017	10.1007/s00248-016-0868-8	no	inexistent access	inexistent access	NCBI/ENA/DDBJ		codes do not exist: SRA046860.2
5041	FEMS MICROBIOLOGY ECOLOGY	2016	10.1093/femsec/fiw191	no	inexistent access	inexistent access	NCBI/ENA/DDBJ		codes do not exist: SRP072280
3280	ENVIRONMENTAL MICROBIOLOGY	2017	10.1111/1462-2920.13943	no	inexistent access	inexistent access	NCBI/ENA/DDBJ		codes do not exist: SRP114489, SRP114492
152	WATER RESEARCH	2019	10.1016/j.watres.2018.12.069	no	inexistent access	inexistent access	NCBI/ENA/DDBJ		codes do not exist: SRP139701
395	BMC MICROBIOLOGY	2019	10.1186/s12866-019-1400-3	no	inexistent access	inexistent access	NCBI/ENA/DDBJ		codes do not exist: SRP149856
677	APPLIED MICROBIOLOGY AND BIOTECHNOLOGY	2019	10.1007/s00253-018-9465-8	no	inexistent access	inexistent access	NCBI/ENA/DDBJ		codes do not exist: SRP150899
2150	WATER RESEARCH	2018	10.1016/j.watres.2018.02.003	no	inexistent access	inexistent access	NCBI/ENA/DDBJ		codes do not exist: SRS2176809, SRS2176537, SRS 2177065, SRS 2177058, SRS2177067, SRS2177066, SRS2177069, SRS2177068
1970	APPLIED MICROBIOLOGY AND BIOTECHNOLOGY	2018	10.1007/s00253-018-8971-z	no	inexistent access	inexistent access	NCBI/ENA/DDBJ		codes do not exist: DRA006354
3465	PROCEEDINGS OF THE NATIONAL ACADEMY OF SCIENCES OF THE UNITED STATES OF AMERICA	2017	10.1073/pnas.1710262114	no	inexistent access	inexistent access	other	esnapd2.rockefeller.edu/Australia_FastQC_files/Australia_AD_KS_FastQC_files.zip	link does not work
3571	MICROBIOME	2017	10.1186/s40168-017-0331-1	no	inexistent access	inexistent access	other	http://chimera.asc.ohio-state.edu/Danczak_Genomes_and_Protein_sequences.html	link does not work
5307	JOURNAL OF MICROBIOLOGICAL METHODS	2016	10.1016/j.mimet.2016.08.005	no	inexistent access	inexistent access	other	www.nmbu.no/en/about-nmbu/faculties/vetbio/departments/ikbm/research/midivlab/archive	link does not work
635	SYSTEMATIC AND APPLIED MICROBIOLOGY	2019	10.1016/j.syapm.2018.11.001	no	inexistent access	inexistent access	other	https://de.cyverse.org/dl/d/36DABF23-D12E-4CA9-B0A3-F2529C204E3C/Ramos-Barbero.zip	link does not work
4535	SCIENCE OF THE TOTAL ENVIRONMENT	2017	10.1016/jscitotenv.2016.12.138	no	inexistent access	inexistent access			"The metagenomic data obtained were deposited ... with the sample accession number of PENDING."
1102	BMC MICROBIOLOGY	2018	10.1186/s12866-018-1304-7	no	inexistent access	inexistent access			"The raw sequences of paired end reads in the fastq files were submitted to European Bioinformatics Institute" but no code is provided.
1730	ENVIRONMENTAL MICROBIOLOGY	2018	10.1111/1462-2920.14250	no	inexistent access	inexistent access
2058	FEMS MICROBIOLOGY ECOLOGY	2018	10.1093/femsec/fiy041	no	inexistent access	mistake	NCBI/ENA/DDBJ		The authors cite accession SR107015, which does not exist. Yet, SRP107015 does exist.
986	SYSTEMATIC AND APPLIED MICROBIOLOGY	2018	10.1016/j.syapm.2018.05.006	no	inexistent access	mistake	NCBI/ENA/DDBJ		The authors cite Bioproject NA382437, which does not exist. Yet, PRJNA382437 does exist.
137	ENVIRONMENTAL POLLUTION	2019	10.1016/j.envpol.2018.12.045	no	not mentioned	not mentioned			"Data not available / Data will be made available on request"
94	APPLIED AND ENVIRONMENTAL MICROBIOLOGY	2019	10.1128/AEM.02830-18	no	not mentioned	not mentioned
6418	PROCEEDINGS OF THE NATIONAL ACADEMY OF SCIENCES OF THE UNITED STATES OF AMERICA	2016	10.1073/pnas.1523817113	no	not mentioned	not mentioned
4690	PLOS ONE	2017	10.1371/journal.pone.0169841	no	not mentioned	not mentioned
1778	ISME JOURNAL	2018	10.1038/s41396-018-0071-7	no	not mentioned	not mentioned
3422	FEMS MICROBIOLOGY ECOLOGY	2017	10.1093/femsec/fix114	no	not mentioned	not mentioned
3582	MSPHERE	2017	10.1128/mSphere.00277-17	no	not mentioned	not mentioned
35	BIORESOURCE TECHNOLOGY	2019	10.1016/j.biortech.2019.01.099	no	not mentioned	not mentioned
149	CHEMOSPHERE	2019	10.1016/j.chemosphere.2018.12.167	no	not mentioned	not mentioned
153	BIORESOURCE TECHNOLOGY	2019	10.1016/j.biortech.2019.01.047	no	not mentioned	not mentioned
157	CHEMICAL ENGINEERING JOURNAL	2019	10.1016/j.cej.2018.12.117	no	not mentioned	not mentioned
168	SCIENCE OF THE TOTAL ENVIRONMENT	2019	10.1016/j.scitotenv.2018.12.105	no	not mentioned	not mentioned
195	WATER RESEARCH	2019	10.1016/j.watres.2018.12.034	no	not mentioned	not mentioned
196	SCIENCE OF THE TOTAL ENVIRONMENT	2019	10.1016/j.scitotenv.2018.11.429	no	not mentioned	not mentioned
212	SCIENTIFIC REPORTS	2019	10.1038/s41598-019-40830-0	no	not mentioned	not mentioned
295	JOURNAL OF APPLIED MICROBIOLOGY	2019	10.1111/jam.14166	no	not mentioned	not mentioned
299	ENVIRONMENTAL POLLUTION	2019	10.1016/j.envpol.2018.11.093	no	not mentioned	not mentioned
328	SCIENCE OF THE TOTAL ENVIRONMENT	2019	10.1016/j.scitotenv.2018.10.354	no	not mentioned	not mentioned
330	SCIENCE OF THE TOTAL ENVIRONMENT	2019	10.1016/j.scitotenv.2018.11.052	no	not mentioned	not mentioned
357	SCIENCE OF THE TOTAL ENVIRONMENT	2019	10.1016/j.scitotenv.2018.09.336	no	not mentioned	not mentioned
358	CHEMICAL ENGINEERING JOURNAL	2019	10.1016/j.cej.2018.10.151	no	not mentioned	not mentioned
361	SCIENTIFIC REPORTS	2019	10.1038/s41598-019-38489-8	no	not mentioned	not mentioned
376	SCIENCE OF THE TOTAL ENVIRONMENT	2019	10.1016/j.scitotenv.2018.10.050	no	not mentioned	not mentioned
409	GENES	2019	10.3390/genes10020106	no	not mentioned	not mentioned
431	JOURNAL OF MICROBIOLOGICAL METHODS	2019	10.1016/j.mimet.2018.12.014	no	not mentioned	not mentioned
452	ENVIRONMENTAL POLLUTION	2019	10.1016/j.envpol.2018.11.024	no	not mentioned	not mentioned
453	ENVIRONMENTAL POLLUTION	2019	10.1016/j.envpol.2018.11.019	no	not mentioned	not mentioned
491	BIORESOURCE TECHNOLOGY	2019	10.1016/j.biortech.2018.11.069	no	not mentioned	not mentioned
492	BIORESOURCE TECHNOLOGY	2019	10.1016/j.biortech.2018.12.020	no	not mentioned	not mentioned
494	BIORESOURCE TECHNOLOGY	2019	10.1016/j.biortech.2018.11.043	no	not mentioned	not mentioned
668	MICROBIAL ECOLOGY	2019	10.1007/s00248-018-1209-x	no	not mentioned	not mentioned
708	CHEMICAL ENGINEERING JOURNAL	2019	10.1016/j.cej.2018.08.110	no	not mentioned	not mentioned
720	BMC BIOINFORMATICS	2018	10.1186/s12859-018-2540-4	no	not mentioned	not mentioned
741	SCIENCE OF THE TOTAL ENVIRONMENT	2018	10.1016/j.scitotenv.2018.07.213	no	not mentioned	not mentioned
758	SCIENCE OF THE TOTAL ENVIRONMENT	2018	10.1016/j.scitotenv.2018.06.298	no	not mentioned	not mentioned
771	FRONTIERS IN MICROBIOLOGY	2018	10.3389/fmicb.2018.03002	no	not mentioned	not mentioned
774	INTERNATIONAL JOURNAL OF FOOD MICROBIOLOGY	2018	10.1016/j.ijfoodmicro.2018.07.022	no	not mentioned	not mentioned
864	ENVIRONMENTAL POLLUTION	2018	10.1016/j.envpol.2018.08.090	no	not mentioned	not mentioned
873	CHEMOSPHERE	2018	10.1016/j.chemosphere.2018.08.132	no	not mentioned	not mentioned
877	CHEMOSPHERE	2018	10.1016/j.chemosphere.2018.08.162	no	not mentioned	not mentioned
878	BIORESOURCE TECHNOLOGY	2018	10.1016/j.biortech.2018.08.132	no	not mentioned	not mentioned
885	FOOD MICROBIOLOGY	2018	10.1016/j.fm.2018.07.009	no	not mentioned	not mentioned
934	CHEMICAL ENGINEERING JOURNAL	2018	10.1016/j.cej.2018.07.068	no	not mentioned	not mentioned
1056	JOURNAL OF APPLIED MICROBIOLOGY	2018	10.1111/jam.14045	no	not mentioned	not mentioned
1059	MICROBIAL ECOLOGY	2018	10.1007/s00248-018-1192-2	no	not mentioned	not mentioned
1069	BIORESOURCE TECHNOLOGY	2018	10.1016/j.biortech.2018.06.091	no	not mentioned	not mentioned
1070	BIORESOURCE TECHNOLOGY	2018	10.1016/j.biortech.2018.08.011	no	not mentioned	not mentioned
1135	CHEMICAL ENGINEERING JOURNAL	2018	10.1016/j.cej.2018.05.173	no	not mentioned	not mentioned
1265	MICROBIAL ECOLOGY	2018	10.1007/s00248-018-1160-x	no	not mentioned	not mentioned
1288	3 BIOTECH	2018	10.1007/s13205-018-1460-3	no	not mentioned	not mentioned
1308	ENVIRONMENTAL SCIENCE & TECHNOLOGY	2018	10.1021/acs.est.8b02374	no	not mentioned	not mentioned
1321	CHEMICAL ENGINEERING JOURNAL	2018	10.1016/j.cej.2018.04.189	no	not mentioned	not mentioned
1366	MSYSTEMS	2018	10.1128/mSystems.00137-18	no	not mentioned	not mentioned
1394	ENVIRONMENTAL MICROBIOLOGY	2018	10.1111/1462-2920.14310	no	not mentioned	not mentioned
1416	ENVIRONMENTAL SCIENCE AND POLLUTION RESEARCH	2018	10.1007/s11356-018-2485-1	no	not mentioned	not mentioned
1434	INFECTION GENETICS AND EVOLUTION	2018	10.1016/j.meegid.2018.04.024	no	not mentioned	not mentioned
1456	BIORESOURCE TECHNOLOGY	2018	10.1016/j.biortech.2018.05.064	no	not mentioned	not mentioned
1458	ENVIRONMENTAL POLLUTION	2018	10.1016/j.envpol.2018.04.062	no	not mentioned	not mentioned
1461	SCIENCE OF THE TOTAL ENVIRONMENT	2018	10.1016/j.scitotenv.2018.04.194	no	not mentioned	not mentioned
1462	SCIENCE OF THE TOTAL ENVIRONMENT	2018	10.1016/j.scitotenv.2018.03.366	no	not mentioned	not mentioned
1488	INTERNATIONAL JOURNAL OF FOOD MICROBIOLOGY	2018	10.1016/j.ijfoodmicro.2018.04.034	no	not mentioned	not mentioned
1637	SCIENCE OF THE TOTAL ENVIRONMENT	2018	10.1016/j.scitotenv.2018.03.061	no	not mentioned	not mentioned
1712	INTERNATIONAL JOURNAL OF FOOD MICROBIOLOGY	2018	10.1016/j.ijfoodmicro.2018.04.013	no	not mentioned	not mentioned
1728	MBIO	2018	10.1128/mBio.00969-18	no	not mentioned	not mentioned
1777	ISME JOURNAL	2018	10.1038/s41396-018-0068-2	no	not mentioned	not mentioned
1821	BIORESOURCE TECHNOLOGY	2018	10.1016/j.biortech.2018.03.050	no	not mentioned	not mentioned
1852	ENVIRONMENTAL SCIENCE & TECHNOLOGY	2018	10.1021/acs.est.8b00152	no	not mentioned	not mentioned
1894	CHEMICAL ENGINEERING JOURNAL	2018	10.1016/j.cej.2018.01.159	no	not mentioned	not mentioned
1927	ENVIRONMENTAL SCIENCE AND POLLUTION RESEARCH	2018	10.1007/s11356-018-1991-5	no	not mentioned	not mentioned
1950	JOURNAL OF GENERAL VIROLOGY	2018	10.1099/jgv.0.001073	no	not mentioned	not mentioned
1956	ENVIRONMENTAL MICROBIOLOGY REPORTS	2018	10.1111/1758-2229.12641	no	not mentioned	not mentioned
1977	BIORESOURCE TECHNOLOGY	2018	10.1016/j.biortech.2018.02.084	no	not mentioned	not mentioned
1980	FOOD MICROBIOLOGY	2018	10.1016/j.fm.2017.12.003	no	not mentioned	not mentioned
2003	SCIENTIFIC REPORTS	2018	10.1038/s41598-018-25927-2	no	not mentioned	not mentioned
2014	ENVIRONMENTAL SCIENCE & TECHNOLOGY	2018	10.1021/acs.est.7b06574	no	not mentioned	not mentioned
2034	FRONTIERS IN MICROBIOLOGY	2018	10.3389/fmicb.2018.00894	no	not mentioned	not mentioned
2128	JOURNAL OF CLINICAL MICROBIOLOGY	2018	10.1128/JCM.01663-17	no	not mentioned	not mentioned
2185	WATER RESEARCH	2018	10.1016/j.watres.2018.01.001	no	not mentioned	not mentioned
2236	GENES	2018	10.3390/genes9040192	no	not mentioned	not mentioned
2398	GENES	2018	10.3390/genes9030133	no	not mentioned	not mentioned
2475	ENVIRONMENTAL POLLUTION	2018	10.1016/j.envpol.2017.11.097	no	not mentioned	not mentioned
2683	CHEMICAL ENGINEERING JOURNAL	2018	10.1016/j.cej.2017.09.168	no	not mentioned	not mentioned
2740	JOURNAL OF BIOTECHNOLOGY	2018	10.1016/j.jbiotec.2017.10.017	no	not mentioned	not mentioned
2906	GENES	2018	10.3390/genes9010055	no	not mentioned	not mentioned
2910	VIRUSES-BASEL	2018	10.3390/v10010030	no	not mentioned	not mentioned
2924	ENVIRONMENTAL SCIENCE AND POLLUTION RESEARCH	2018	10.1007/s11356-017-0615-9	no	not mentioned	not mentioned
2925	ENVIRONMENTAL SCIENCE AND POLLUTION RESEARCH	2018	10.1007/s11356-017-0600-3	no	not mentioned	not mentioned
2992	BIORESOURCE TECHNOLOGY	2018	10.1016/j.biortech.2017.09.026	no	not mentioned	not mentioned
2993	INTERNATIONAL JOURNAL OF BIOLOGICAL MACROMOLECULES	2018	10.1016/j.ijbiomac.2017.08.100	no	not mentioned	not mentioned
3044	CHEMICAL ENGINEERING JOURNAL	2017	10.1016/j.cej.2017.08.011	no	not mentioned	not mentioned
3116	MICROBIOLOGYOPEN	2017	10.1002/mbo3.521	no	not mentioned	not mentioned
3125	SYSTEMATIC AND APPLIED MICROBIOLOGY	2017	10.1016/j.syapm.2017.09.007	no	not mentioned	not mentioned
3217	SCIENCE OF THE TOTAL ENVIRONMENT	2017	10.1016/j.scitotenv.2017.04.105	no	not mentioned	not mentioned
3251	MBIO	2017	10.1128/mBio.01326-17	no	not mentioned	not mentioned
3266	GENES	2017	10.3390/genes8110314	no	not mentioned	not mentioned
3324	JOURNAL OF APPLIED MICROBIOLOGY	2017	10.1111/jam.13572	no	not mentioned	not mentioned
3343	BIORESOURCE TECHNOLOGY	2017	10.1016/j.biortech.2017.07.153	no	not mentioned	not mentioned
3344	BIORESOURCE TECHNOLOGY	2017	10.1016/j.biortech.2017.08.065	no	not mentioned	not mentioned
3458	MICROBIOLOGYOPEN	2017	10.1002/mbo3.500	no	not mentioned	not mentioned
3660	JOURNAL OF APPLIED MICROBIOLOGY	2017	10.1111/jam.13530	no	not mentioned	not mentioned
3673	SCIENTIFIC REPORTS	2017	10.1038/s41598-017-10613-6	no	not mentioned	not mentioned
3696	GENE	2017	10.1016/j.gene.2017.04.046	no	not mentioned	not mentioned
3770	JOURNAL OF CLINICAL MICROBIOLOGY	2017	10.1128/JCM.00462-17	no	not mentioned	not mentioned
3774	MICROBIOLOGYOPEN	2017	10.1002/mbo3.490	no	not mentioned	not mentioned
3780	MICROBIOLOGYOPEN	2017	10.1002/mbo3.487	no	not mentioned	not mentioned
3816	ISME JOURNAL	2017	10.1038/ismej.2017.48	no	not mentioned	not mentioned
3823	JOURNAL OF MICROBIOLOGICAL METHODS	2017	10.1016/j.mimet.2017.05.005	no	not mentioned	not mentioned
3830	SCIENTIFIC REPORTS	2017	10.1038/s41598-017-07091-1	no	not mentioned	not mentioned
3904	ENVIRONMENTAL SCIENCE & TECHNOLOGY	2017	10.1021/acs.est.7b01001	no	not mentioned	not mentioned
3914	INTERNATIONAL JOURNAL OF FOOD MICROBIOLOGY	2017	10.1016/j.ijfoodmicro.2017.04.002	no	not mentioned	not mentioned
4045	WATER RESEARCH	2017	10.1016/j.watres.2017.03.058	no	not mentioned	not mentioned
4053	SCIENTIFIC REPORTS	2017	10.1038/s41598-017-03161-6	no	not mentioned	not mentioned
4170	JOURNAL OF BIOTECHNOLOGY	2017	10.1016/j.jbiotec.2016.12.006	no	not mentioned	not mentioned
4172	JOURNAL OF BIOTECHNOLOGY	2017	10.1016/j.jbiotec.2017.01.001	no	not mentioned	not mentioned
4181	CHEMICAL ENGINEERING JOURNAL	2017	10.1016/j.cej.2017.01.085	no	not mentioned	not mentioned
4207	FEMS MICROBIOLOGY ECOLOGY	2017	10.1093/femsec/fix058	no	not mentioned	not mentioned
4348	JOURNAL OF GENERAL VIROLOGY	2017	10.1099/jgv.0.000709	no	not mentioned	not mentioned
4392	MICROBIAL ECOLOGY	2017	10.1007/s00248-016-0874-x	no	not mentioned	not mentioned
4408	FOOD MICROBIOLOGY	2017	10.1016/j.fm.2016.09.010	no	not mentioned	not mentioned
4433	WATER RESEARCH	2017	10.1016/j.watres.2016.12.050	no	not mentioned	not mentioned
4436	WATER RESEARCH	2017	10.1016/j.watres.2017.01.006	no	not mentioned	not mentioned
4522	ENVIRONMENTAL POLLUTION	2017	10.1016/j.envpol.2016.12.041	no	not mentioned	not mentioned
4536	SCIENCE OF THE TOTAL ENVIRONMENT	2017	10.1016/j.scitotenv.2016.12.141	no	not mentioned	not mentioned
4638	NUCLEIC ACIDS RESEARCH	2017	10.1093/nar/gkw864	no	not mentioned	not mentioned
4655	JOURNAL OF APPLIED MICROBIOLOGY	2017	10.1111/jam.13347	no	not mentioned	not mentioned
4661	ENVIRONMENTAL POLLUTION	2017	10.1016/j.envpol.2016.11.071	no	not mentioned	not mentioned
4769	WATER RESEARCH	2017	10.1016/j.watres.2016.10.077	no	not mentioned	not mentioned
4906	MICROBIAL ECOLOGY	2017	10.1007/s00248-016-0837-2	no	not mentioned	not mentioned
4907	MICROBIAL ECOLOGY	2017	10.1007/s00248-016-0892-8	no	not mentioned	not mentioned
4930	SCIENCE OF THE TOTAL ENVIRONMENT	2017	10.1016/j.scitotenv.2016.09.214	no	not mentioned	not mentioned
4983	INTERNATIONAL JOURNAL OF FOOD MICROBIOLOGY	2016	10.1016/j.ijfoodmicro.2016.08.030	no	not mentioned	not mentioned
5008	ENVIRONMENTAL MICROBIOLOGY	2016	10.1111/1462-2920.13407	no	not mentioned	not mentioned
5081	FOOD MICROBIOLOGY	2016	10.1016/j.fm.2016.07.002	no	not mentioned	not mentioned
5113	SCIENTIFIC REPORTS	2016	10.1038/srep36666	no	not mentioned	not mentioned
5164	ENVIRONMENTAL SCIENCE AND POLLUTION RESEARCH	2016	10.1007/s11356-016-7500-9	no	not mentioned	not mentioned
5198	ENVIRONMENTAL POLLUTION	2016	10.1016/j.envpol.2016.08.039	no	not mentioned	not mentioned
5203	BIORESOURCE TECHNOLOGY	2016	10.1016/j.biortech.2016.08.013	no	not mentioned	not mentioned
5245	SCIENTIFIC REPORTS	2016	10.1038/srep34337	no	not mentioned	not mentioned
5292	BIORESOURCE TECHNOLOGY	2016	10.1016/j.biortech.2016.07.058	no	not mentioned	not mentioned
5306	JOURNAL OF MICROBIOLOGICAL METHODS	2016	10.1016/j.mimet.2016.07.023	no	not mentioned	not mentioned
5332	MICROBIOME	2016	10.1186/s40168-016-0196-8	no	not mentioned	not mentioned
5370	VIROLOGY JOURNAL	2016	10.1186/s12985-016-0608-1	no	not mentioned	not mentioned
5576	JOURNAL OF MICROBIOLOGICAL METHODS	2016	10.1016/j.mimet.2016.05.022	no	not mentioned	not mentioned
5592	BIORESOURCE TECHNOLOGY	2016	10.1016/j.biortech.2016.03.045	no	not mentioned	not mentioned
5594	BIORESOURCE TECHNOLOGY	2016	10.1016/j.biortech.2016.04.087	no	not mentioned	not mentioned
5597	FOOD MICROBIOLOGY	2016	10.1016/j.fm.2016.03.005	no	not mentioned	not mentioned
5621	JOURNAL OF BIOTECHNOLOGY	2016	10.1016/j.jbiotec.2016.05.018	no	not mentioned	not mentioned
5649	INTERNATIONAL JOURNAL OF FOOD MICROBIOLOGY	2016	10.1016/j.ijfoodmicro.2016.03.027	no	not mentioned	not mentioned
5676	ENVIRONMENTAL MICROBIOLOGY	2016	10.1111/1462-2920.13401	no	not mentioned	not mentioned
5693	JOURNAL OF CLINICAL MICROBIOLOGY	2016	10.1128/JCM.02638-15	no	not mentioned	not mentioned
5697	ENVIRONMENTAL POLLUTION	2016	10.1016/j.envpol.2016.04.009	no	not mentioned	not mentioned
5698	ENVIRONMENTAL SCIENCE AND POLLUTION RESEARCH	2016	10.1007/s11356-016-6474-y	no	not mentioned	not mentioned
5707	MICROBIAL ECOLOGY	2016	10.1007/s00248-016-0746-4	no	not mentioned	not mentioned
5718	BIORESOURCE TECHNOLOGY	2016	10.1016/j.biortech.2016.03.069	no	not mentioned	not mentioned
5860	INFECTION GENETICS AND EVOLUTION	2016	10.1016/j.meegid.2015.08.044	no	not mentioned	not mentioned
6088	ARCHIVES OF VIROLOGY	2016	10.1007/s00705-016-2819-6	no	not mentioned	not mentioned
6104	JOURNAL OF CLINICAL MICROBIOLOGY	2016	10.1128/JCM.03050-15	no	not mentioned	not mentioned
6130	FOOD MICROBIOLOGY	2016	10.1016/j.fm.2015.10.008	no	not mentioned	not mentioned
6184	BIOTECHNOLOGY FOR BIOFUELS	2016	10.1186/s13068-016-0465-6	no	not mentioned	not mentioned
6242	JOURNAL OF MICROBIOLOGICAL METHODS	2016	10.1016/j.mimet.2016.01.011	no	not mentioned	not mentioned
6335	VIRUSES-BASEL	2016	10.3390/v8020035	no	not mentioned	not mentioned
6563	JOURNAL OF MICROBIOLOGICAL METHODS	2016	10.1016/j.mimet.2015.11.008	no	not mentioned	not mentioned
6573	ENVIRONMENTAL SCIENCE AND POLLUTION RESEARCH	2016	10.1007/s11356-015-5617-x	no	not mentioned	not mentioned
6588	WATER RESEARCH	2016	10.1016/j.watres.2015.10.029	no	not mentioned	not mentioned
5032	MICROBIOLOGYOPEN	2016	10.1002/mbo3.380	no	inexistent access	SUB	NCBI/ENA/DDBJ		codes do not exist: SUB1112034
4409	FOOD MICROBIOLOGY	2017	10.1016/j.fm.2016.10.004	no	inexistent access	SUB	NCBI/ENA/DDBJ		codes do not exist: SUB1368945
3418	JOURNAL OF GENERAL VIROLOGY	2017	10.1099/jgv.0.000920	no	inexistent access	SUB	NCBI/ENA/DDBJ		codes do not exist: SUB1938413
338	ENVIRONMENTAL SCIENCE & TECHNOLOGY	2019	10.1021/acs.est.8b05907	no	inexistent access	SUB	NCBI/ENA/DDBJ		codes do not exist: SUB2036733
2728	SCIENCE OF THE TOTAL ENVIRONMENT	2018	10.1016/j.scitotenv.2017.08.295	no	inexistent access	SUB	NCBI/ENA/DDBJ		codes do not exist: SUB2653512
447	ENVIRONMENTAL SCIENCE AND POLLUTION RESEARCH	2019	10.1007/s11356-018-3927-5	no	inexistent access	SUB	NCBI/ENA/DDBJ		codes do not exist: SUB2882181
2053	ENVIRONMENTAL MICROBIOLOGY	2018	10.1111/1462-2920.14104	no	inexistent access	SUB	NCBI/ENA/DDBJ		codes do not exist: SUB3222023
884	FOOD MICROBIOLOGY	2018	10.1016/j.fm.2018.07.001	no	inexistent access	SUB	NCBI/ENA/DDBJ		codes do not exist: SUB3619204
5033	MICROBIOLOGYOPEN	2016	10.1002/mbo3.392	no	inexistent access	will come	NCBI/ENA/DDBJ	https://www.ncbi.nlm.nih.gov/bioproject/317945	"No public data is linked to this project. Any recently released data that cites this project will be linked to it within a few days." But registration date is 11-Apr-2016
3500	BIORESOURCE TECHNOLOGY	2017	10.1016/j.biortech.2017.05.094	no	inexistent access	will come	NCBI/ENA/DDBJ	https://www.ncbi.nlm.nih.gov/bioproject/386520	"No public data is linked to this project. Any recently released data that cites this project will be linked to it within a few days." But registration date is 12-May-2017
1457	BIORESOURCE TECHNOLOGY	2018	10.1016/j.biortech.2018.05.053	no	inexistent access	will come	NCBI/ENA/DDBJ	https://www.ncbi.nlm.nih.gov/bioproject/PRJNA438369	"No public data is linked to this project. Any recently released data that cites this project will be linked to it within a few days." But registration date is 14-Mar-2018
4268	JOURNAL OF APPLIED MICROBIOLOGY	2017	10.1111/jam.13437	no	inexistent access	will come	NCBI/ENA/DDBJ	https://www.ncbi.nlm.nih.gov/bioproject/PRJNA343213	"No public data is linked to this project. Any recently released data that cites this project will be linked to it within a few days." But registration date is 16-Sep-2016
3304	APPLIED MICROBIOLOGY AND BIOTECHNOLOGY	2017	10.1007/s00253-017-8469-0	no	inexistent access	will come	NCBI/ENA/DDBJ	https://www.ncbi.nlm.nih.gov/bioproject/PRJNA358454	"No public data is linked to this project. Any recently released data that cites this project will be linked to it within a few days." But registration date is 22-Dec-2016
5766	PLOS ONE	2016	10.1371/journal.pone.0156854	no	inexistent access	will come	NCBI/ENA/DDBJ	https://www.ncbi.nlm.nih.gov/bioproject/PRJNA316198	"No public data is linked to this project. Any recently released data that cites this project will be linked to it within a few days." But registration date is 24-Mar-2016
3710	ENVIRONMENTAL SCIENCE & TECHNOLOGY	2017	10.1021/acs.est.7b00294	no	inexistent access	will come	NCBI/ENA/DDBJ	https://www.ncbi.nlm.nih.gov/bioproject/PRJNA384316	"No public data is linked to this project. Any recently released data that cites this project will be linked to it within a few days." But registration date is 26-Apr-2017
6014	ENVIRONMENTAL SCIENCE & TECHNOLOGY	2016	10.1021/acs.est.5b05959	no	inexistent access	will come	NCBI/ENA/DDBJ	https://www.ncbi.nlm.nih.gov/bioproject/PRJNA304212	"No public data is linked to this project. Any recently released data that cites this project will be linked to it within a few days." But registration date is 26-Nov-2015
14	FOOD MICROBIOLOGY	2019	10.1016/j.fm.2018.12.001	no	inexistent access	will come	NCBI/ENA/DDBJ	https://www.ncbi.nlm.nih.gov/bioproject/PRJNA506919	"No public data is linked to this project. Any recently released data that cites this project will be linked to it within a few days." But registration date is 26-Nov-2018
3404	INTERNATIONAL JOURNAL OF FOOD MICROBIOLOGY	2017	10.1016/j.ijfoodmicro.2017.07.015	no	inexistent access	will come	NCBI/ENA/DDBJ	https://www.ncbi.nlm.nih.gov/bioproject/PRJNA355071	"No public data is linked to this project. Any recently released data that cites this project will be linked to it within a few days." But registration date is 28-Nov-2016
429	APPLIED MICROBIOLOGY AND BIOTECHNOLOGY	2019	10.1007/s00253-018-09581-2	no	inexistent access	will come	NCBI/ENA/DDBJ	https://www.ncbi.nlm.nih.gov/bioproject/420602	"No public data is linked to this project. Any recently released data that cites this project will be linked to it within a few days." But registration date is 30-Nov-2017
194	WATER RESEARCH	2019	10.1016/j.watres.2018.12.041	no	inexistent access	will come	NCBI/ENA/DDBJ	https://www.ncbi.nlm.nih.gov/bioproject/PRJNA416337	"No public data is linked to this project. Any recently released data that cites this project will be linked to it within a few days." But registration date is 30-Oct-2017
3362	PLOS ONE	2017	10.1371/journal.pone.0186939	no	inexistent access	will come	NCBI/ENA/DDBJ	https://www.ncbi.nlm.nih.gov/bioproject/PRJNA337739	"No public data is linked to this project. Any recently released data that cites this project will be linked to it within a few days." But registration date is 4-Aug-2016
5106	SCIENCE OF THE TOTAL ENVIRONMENT	2016	10.1016/j.scitotenv.2016.07.154	no	inexistent access	will come	NCBI/ENA/DDBJ	https://www.ncbi.nlm.nih.gov/bioproject/PRJNA311080	"No public data is linked to this project. Any recently released data that cites this project will be linked to it within a few days." But registration date is 5-Feb-2016
296	JOURNAL OF APPLIED MICROBIOLOGY	2019	10.1111/jam.14168	no	inexistent access	will come	NCBI/ENA/DDBJ	https://www.ncbi.nlm.nih.gov/bioproject/PRJNA397447	"No public data is linked to this project. Any recently released data that cites this project will be linked to it within a few days." But registration date is 7-Aug-2017
5343	ENVIRONMENTAL SCIENCE & TECHNOLOGY	2016	10.1021/acs.est.6b00262	no	inexistent access	will come	NCBI/ENA/DDBJ	https://www.ncbi.nlm.nih.gov/bioproject/PRJNA321035	"No public data is linked to this project. Any recently released data that cites this project will be linked to it within a few days." But registration date is 9-May-2016
3323	JOURNAL OF APPLIED MICROBIOLOGY	2017	10.1111/jam.13555	no	inexistent access	will come	NCBI/ENA/DDBJ	https://www.ncbi.nlm.nih.gov/bioproject/PRJEB21495	"No public data is linked to this project. Any recently released data that cites this project will be linked to it within a few days." But the registration date is 9-Oct-2017
555	NATURE COMMUNICATIONS	2019	10.1038/s41467-018-07859-7	no	inexistent access	will come	NCBI/ENA/DDBJ	https://www.ncbi.nlm.nih.gov/geo/query/acc.cgi?acc=GSE113581	"to be released on April 2021"
4441	BMC GENOMICS	2017	10.1186/s12864-017-3612-y	no	inexistent access	will come			"Primary data will not be shared due to provisional patent application filing."
5112	BIOTECHNOLOGY FOR BIOFUELS	2016	10.1186/s13068-016-0658-z	no u/r					"All data are included in the manuscript and additional information will be provided upon request"
2084	GENES	2018	10.3390/genes9050231	no u/r					"All generated datasets can be made available upon request to the corresponding author"
1363	MSPHERE	2018	10.1128/mSphere.00460-18	no u/r					"All relevant data have been included in the article. We will provide any additional data upon request"
3906	BMC MICROBIOLOGY	2017	10.1186/s12866-017-1052-0	no u/r					"available from the corresponding author on reasonable request"
719	BMC MICROBIOLOGY	2018	10.1186/s12866-018-1373-7	no u/r					"available from the corresponding author upon request"
908	BMC MICROBIOLOGY	2018	10.1186/s12866-018-1284-7	no u/r					"available from the corresponding authors upon reasonable request"
2287	ENVIRONMENTAL POLLUTION	2018	10.1016/j.envpol.2018.01.014	no u/r					"Data will be made available on request"
2164	BIOTECHNOLOGY FOR BIOFUELS	2018	10.1186/s13068-018-1111-2	no u/r					"The datasets from the study are available upon request"
3686	BMC MICROBIOLOGY	2017	10.1186/s12866-017-1092-5	no u/r					"The datasets used and/or analysed during the current study are available from the corresponding author on reasonable request."
4007	BMC GENOMICS	2017	10.1186/s12864-017-3891-3	no u/r					"The datasets used and/or analyzed during the current study are available from the corresponding author on request."
1096	BMC GENOMICS	2018	10.1186/s12864-018-5152-5	no u/r					"The raw data generated in this study can be obtained by reasonable request to the corresponding authors."
1108	FRONTIERS IN CELLULAR AND INFECTION MICROBIOLOGY	2018	10.3389/fcimb.2018.00375	no u/r					"The sequencing datasets for this manuscript are not publicly available due to restrictions from the Ethical Committee (Ethics Commission of the Canton of Bern). Requests to access the datasets should be directed to Dr. Christian M. Beuret, christian.beuret@babs.admin.ch."
2745	PLOS ONE	2018	10.1371/journal.pone.0189188	yes			DRYAD	https://datadryad.org/resource/doi:10.5061/dryad.4br36
5931	MOLECULAR ECOLOGY	2016	10.1111/mec.13501	yes			DRYAD	https://datadryad.org/resource/doi:10.5061/dryad.9ng87?show=full
5974	MOLECULAR ECOLOGY RESOURCES	2016	10.1111/1755-0998.12478	yes			DRYAD	https://datadryad.org/resource/doi:10.5061/dryad.m8g90
671	MICROBIAL ECOLOGY	2019	10.1007/s00248-018-1233-x	yes			FIGSHARE	https://figshare.com/articles/Li_H_Mishra_M_Ding_S_Miyamoto_MM_2018_Diversity_and_dynamics_of_Candidatus_Endobugula_and_other_symbiotic_bacteria_in_Chinese_populations_of_the_bryozoan_Bugula_neritina_Microb_Ecol_in_press/6819674/1
2052	ENVIRONMENTAL MICROBIOLOGY	2018	10.1111/1462-2920.14096	yes			FIGSHARE	https://figshare.com/articles/Carnivora_Metagenome_data/5930266/1
2065	MSPHERE	2018	10.1128/mSphere.00229-18	yes			FIGSHARE	https://figshare.com/articles/bamboo-eating_pandas_gut_metagenomes/6303713
4463	MSYSTEMS	2017	10.1128/mSystems.00178-16	yes			FIGSHARE	https://figshare.com/articles/MPG_Ranch_16S_amplicon_data_043013/1504117
4412	FRONTIERS IN MICROBIOLOGY	2017	10.3389/fmicb.2017.00472	yes			JGI	https://img.jgi.doe.gov/cgi-bin/m/main.cgi?section=TaxonDetail&page=taxonDetail&taxon_oid=3300010385#
380	NATURE COMMUNICATIONS	2019	10.1038/s41467-019-08499-1	yes			JGI	https://img.jgi.doe.gov/cgi-bin/m/main.cgi?section=FindGenomes&page=displayTaxonList&searchFilter=all&searchTerm=3300029625&file=all28112&allDataFiltersFile=allGenomeDataFilters28112
699	NATURE MICROBIOLOGY	2019	10.1038/s41564-018-0276-6	yes			JGI	https://gold.jgi.doe.gov/studies?id=Gs0114513
756	PEERJ	2018	10.7717/peerj.6075	yes			JGI	https://img.jgi.doe.gov/cgi-bin/m/main.cgi?section=TaxonDetail&page=taxonDetail&taxon_oid=3300001260
853	APPLIED AND ENVIRONMENTAL MICROBIOLOGY	2018	10.1128/AEM.01124-18	yes			JGI	https://genome.jgi.doe.gov/portal/S1TSphfallaxMT/S1TSphfallaxMT.info.html
925	NATURE COMMUNICATIONS	2018	10.1038/s41467-018-07335-2	yes			JGI	https://img.jgi.doe.gov/cgi-bin/m/main.cgi?section=FindGenomes&page=displayTaxonList&searchFilter=t.taxon_oid&searchTerm=3300020974&file=t.taxon_oid22717
935	SCIENCE OF THE TOTAL ENVIRONMENT	2018	10.1016/j.scitotenv.2018.05.256	yes			JGI	https://img.jgi.doe.gov/cgi-bin/m/main.cgi?section=TaxonDetail&page=taxonDetail&taxon_oid=3300009816
1365	MSYSTEMS	2018	10.1128/mSystems.00045-18	yes			JGI	https://img.jgi.doe.gov/cgi-bin/m/main.cgi?section=FindGenomes&page=displayTaxonList&searchFilter=all&searchTerm=3300006177&file=all4960&allDataFiltersFile=allGenomeDataFilters4960
2061	MSPHERE	2018	10.1128/mSphere.00202-18	yes			JGI	https://img.jgi.doe.gov/cgi-bin/m/main.cgi?section=FindGenomes&page=displayTaxonList&searchFilter=t.taxon_display_name&searchTerm=26656&file=t.taxon_display_name81714
2137	MICROBIAL ECOLOGY	2018	10.1007/s00248-017-1102-z	yes			JGI	https://gold.jgi.doe.gov/analysis_projects?id=Ga0197686
3388	NATURE COMMUNICATIONS	2017	10.1038/s41467-017-01086-2	yes			JGI	https://img.jgi.doe.gov/cgi-bin/m/main.cgi?section=TaxonDetail&page=taxonDetail&taxon_oid=3300000439
3665	ISME JOURNAL	2017	10.1038/ismej.2017.78	yes			JGI	https://genome.jgi.doe.gov/portal/?core=genome&query=3300005062&searchIn=Anything&searchType=Keyword&showAll=false&externallySequenced=true&sortBy=displayNameStr&showRestricted=true&showOnlyPublished=false&showSuperseded=true&sortOrder=asc&rawQuery=false&showFungalOnly=false&activateHighlights=false&programName=all&programYear=all&superkingdom=--any--&status=--any--&scientificProgram=--any--&prod…
3778	MICROBIOLOGYOPEN	2017	10.1002/mbo3.467	yes			JGI	https://img.jgi.doe.gov/cgi-bin/m/main.cgi?section=FindGenomes&page=displayTaxonList&searchFilter=all&searchTerm=3300000930&file=all9624&allDataFiltersFile=allGenomeDataFilters9624
3929	MSPHERE	2017	10.1128/mSphereDirect.00257-17	yes			JGI	https://img.jgi.doe.gov/cgi-bin/m/main.cgi?section=TaxonDetail&page=taxonDetail&taxon_oid=3300006782
4096	ENVIRONMENTAL MICROBIOLOGY	2017	10.1111/1462-2920.13706	yes			JGI	https://img.jgi.doe.gov/cgi-bin/m/main.cgi?section=FindGenomes&page=displayTaxonList&searchFilter=t.taxon_oid&searchTerm=3300006428&file=t.taxon_oid41501
4474	MBIO	2017	10.1128/mBio.02129-16	yes			JGI	https://img.jgi.doe.gov/cgi-bin/m/main.cgi?section=TaxonDetail&page=taxonDetail&taxon_oid=3300002481
4494	FEMS MICROBIOLOGY ECOLOGY	2017	10.1093/femsec/fiw254	yes			JGI	https://gold.jgi.doe.gov/projects?id=Gp0111374
4833	FEMS MICROBIOLOGY ECOLOGY	2017	10.1093/femsec/fiw216	yes			JGI	https://img.jgi.doe.gov/cgi-bin/m/main.cgi?section=TaxonDetail&page=taxonDetail&taxon_oid=3300000130
4866	MBIO	2017	10.1128/mBio.01969-16	yes			JGI	https://genome.jgi.doe.gov/portal/GraSoi08_2SPAdes/GraSoi08_2SPAdes.info.html e https://www.ncbi.nlm.nih.gov/nuccore/CP019171
5133	MSYSTEMS	2016	10.1128/mSystems.00120-16	yes			JGI	https://img.jgi.doe.gov/cgi-bin/m/main.cgi?section=FindGenomes&page=displayTaxonList&searchFilter=t.taxon_oid&searchTerm=3300002523&file=t.taxon_oid18140
5246	PROCEEDINGS OF THE NATIONAL ACADEMY OF SCIENCES OF THE UNITED STATES OF AMERICA	2016	10.1073/pnas.1602897113	yes			JGI	https://gold.jgi.doe.gov/project?id=Gp0052414
5742	FRONTIERS IN MICROBIOLOGY	2016	10.3389/fmicb.2016.00919	yes			JGI	https://img.jgi.doe.gov/cgi-bin/m/main.cgi?section=TaxonDetail&page=taxonDetail&taxon_oid=3300002493
6594	MICROBIAL ECOLOGY	2016	10.1007/s00248-015-0680-x	yes			JGI	https://img.jgi.doe.gov/cgi-bin/m/main.cgi?section=TaxonDetail&page=taxonDetail&taxon_oid=3300002577
57	FRONTIERS IN MICROBIOLOGY	2019	10.3389/fmicb.2019.00726	yes			MG-RAST	https://www.mg-rast.org/mgmain.html?mgpage=search&search=4779141.3
180	FRONTIERS IN MARINE SCIENCE	2019	10.3389/fmars.2019.00131	yes			MG-RAST	https://www.mg-rast.org/mgmain.html?mgpage=project&project=mgp14849
474	3 BIOTECH	2019	10.1007/s13205-019-1580-4	yes			MG-RAST	https://www.mg-rast.org/mgmain.html?mgpage=project&project=mgp18598
508	MICROBIOME	2019	10.1186/s40168-019-0624-7	yes			MG-RAST	http://www.mg-rast.org/mgmain.html?mgpage=overview&metagenome=mgm4551355.3
669	MICROBIAL ECOLOGY	2019	10.1007/s00248-018-1215-z	yes			MG-RAST	https://www.mg-rast.org/mgmain.html?mgpage=project&project=mgp17194
753	SCIENTIFIC DATA	2018	10.1038/sdata.2018.285	yes			MG-RAST	http://www.mg-rast.org/mgmain.html?mgpage=overview&metagenome=mgm4767611.3
866	ENVIRONMENTAL POLLUTION	2018	10.1016/j.envpol.2018.09.096	yes			MG-RAST	https://www.mg-rast.org/mgmain.html?mgpage=project&project=mgp80384
1158	PEERJ	2018	10.7717/peerj.5710	yes			MG-RAST	https://www.mg-rast.org/mgmain.html?mgpage=search&search=mgp13300
1267	MICROBIAL ECOLOGY	2018	10.1007/s00248-018-1172-6	yes			MG-RAST	http://www.mg-rast.org/mgmain.html?mgpage=search&search=4684569.3
1276	ENVIRONMENTAL POLLUTION	2018	10.1016/j.envpol.2018.06.048	yes			MG-RAST	https://www.mg-rast.org/mgmain.html?mgpage=search&search=Anaerobic%20Digester%20Triclosan
1279	WATER RESEARCH	2018	10.1016/j.watres.2018.06.014	yes			MG-RAST	https://www.mg-rast.org/mgmain.html?mgpage=project&project=mgp7228
1483	ENVIRONMENTAL SCIENCE & TECHNOLOGY	2018	10.1021/acs.est.8b01219	yes			MG-RAST	https://www.mg-rast.org/mgmain.html?mgpage=project&project=mgp80013
1607	MICROBIAL ECOLOGY	2018	10.1007/s00248-018-1144-x	yes			MG-RAST	http://www.mg-rast.org/mgmain.html?mgpage=search&search=4718937.3
1883	ENVIRONMENTAL SCIENCE & TECHNOLOGY	2018	10.1021/acs.est.7b05419	yes			MG-RAST	https://www.mg-rast.org/mgmain.html?mgpage=project&project=mgp12943
1978	WATER RESEARCH	2018	10.1016/j.watres.2018.02.054	yes			MG-RAST	https://www.mg-rast.org/mgmain.html?mgpage=search&search=4713033.3
2042	NATURE COMMUNICATIONS	2018	10.1038/s41467-018-04204-w	yes			MG-RAST	https://www.mg-rast.org/mgmain.html?mgpage=project&project=mgp10912
2111	ENVIRONMENTAL SCIENCE & TECHNOLOGY	2018	10.1021/acs.est.7b04273	yes			MG-RAST	https://www.mg-rast.org/mgmain.html?mgpage=overview&metagenome=mgm4688234.3
2573	GENE	2018	10.1016/j.gene.2017.11.039	yes			MG-RAST	https://www.mg-rast.org/mgmain.html?mgpage=search&search=4535167.3
3035	WATER RESEARCH	2017	10.1016/j.watres.2017.09.063	yes			MG-RAST	https://www.mg-rast.org/mgmain.html?mgpage=search&search=mgp80872
3267	GENES	2017	10.3390/genes8110310	yes			MG-RAST	https://www.mg-rast.org/mgmain.html?mgpage=project&project=mgp13223
3381	WATER RESEARCH	2017	10.1016/j.watres.2017.06.046	yes			MG-RAST	https://www.mg-rast.org/mgmain.html?mgpage=search&search=4628882.3
3584	MSPHERE	2017	10.1128/mSphere.00366-17	yes			MG-RAST	http://www.mg-rast.org/mgmain.html?mgpage=search&search=mgm4559916.3
3767	ENVIRONMENTAL MICROBIOLOGY	2017	10.1111/1462-2920.13824	yes			MG-RAST	https://www.mg-rast.org/mgmain.html?mgpage=search&search=4613174.3
3801	MOLECULAR ECOLOGY	2017	10.1111/mec.14186	yes			MG-RAST	http://www.mg-rast.org/mgmain.html?mgpage=search&search=mgm4692501.3
3814	ENVIRONMENTAL MICROBIOLOGY REPORTS	2017	10.1111/1758-2229.12537	yes			MG-RAST	https://www.mg-rast.org/mgmain.html?mgpage=overview&metagenome=mgm4644251.3
3861	PLOS ONE	2017	10.1371/journal.pone.0181503	yes			MG-RAST	https://www.mg-rast.org/mgmain.html?mgpage=search&search=mgm4530045.3
3996	MOLECULAR ECOLOGY	2017	10.1111/mec.14138	yes			MG-RAST	https://www.mg-rast.org/mgmain.html?mgpage=project&project=mgp13673
4002	MICROBIAL ECOLOGY	2017	10.1007/s00248-017-0931-0	yes			MG-RAST	https://www.mg-rast.org/mgmain.html?mgpage=project&project=mgp10865
4081	MICROBIOLOGYOPEN	2017	10.1002/mbo3.443	yes			MG-RAST	https://www.mg-rast.org/mgmain.html?mgpage=project&project=mgp13642
4145	SCIENCE OF THE TOTAL ENVIRONMENT	2017	10.1016/j.scitotenv.2017.02.170	yes			MG-RAST	https://www.mg-rast.org/mgmain.html?mgpage=project&project=mgp16829
4208	MSYSTEMS	2017	10.1128/mSystems.00016-17	yes			MG-RAST	http://www.mg-rast.org/mgmain.html?mgpage=search&search=mgm4730562.3
4323	ENVIRONMENTAL SCIENCE & TECHNOLOGY	2017	10.1021/acs.est.6b05100	yes			MG-RAST	https://www.mg-rast.org/mgmain.html?mgpage=search&search=mgm4540030.3
4390	MICROBIAL ECOLOGY	2017	10.1007/s00248-016-0883-9	yes			MG-RAST	http://www.mg-rast.org/mgmain.html?mgpage=search&search=4615008.3
4411	PEERJ	2017	10.7717/peerj.3098	yes			MG-RAST	https://www.mg-rast.org/mgmain.html?mgpage=search&search=4565458.3
4477	ENVIRONMENTAL SCIENCE AND POLLUTION RESEARCH	2017	10.1007/s11356-017-8364-3	yes			MG-RAST	https://www.mg-rast.org/mgmain.html?mgpage=project&project=mgp18596
4546	CHEMOSPHERE	2017	10.1016/j.chemosphere.2016.12.099	yes			MG-RAST	https://www.mg-rast.org/mgmain.html?mgpage=search&search=4613174.3
4621	FEMS MICROBIOLOGY ECOLOGY	2017	10.1093/femsec/fiw223	yes			MG-RAST	https://www.mg-rast.org/mgmain.html?mgpage=search&search=4696490.3
4924	ENVIRONMENTAL POLLUTION	2017	10.1016/j.envpol.2016.11.047	yes			MG-RAST	https://www.mg-rast.org/mgmain.html?mgpage=overview&metagenome=mgm4810250.3
4981	Scientific Reports	2016	10.1038/srep38432	yes			MG-RAST	https://www.mg-rast.org/mgmain.html?mgpage=project&project=mgp12989
4986	FRONTIERS IN MICROBIOLOGY	2016	10.3389/fmicb.2016.01950	yes			MG-RAST	https://www.mg-rast.org/mgmain.html?mgpage=search&search=4612993.3
5043	JOURNAL OF MICROBIOLOGICAL METHODS	2016	10.1016/j.mimet.2016.10.018	yes			MG-RAST	http://www.mg-rast.org/mgmain.html?mgpage=overview&metagenome=mgm4465947.3
5181	ISME JOURNAL	2016	10.1038/ismej.2016.63	yes			MG-RAST	https://www.mg-rast.org/mgmain.html?mgpage=search&search=4629971.3
5260	NATURE MICROBIOLOGY	2016	10.1038/NMICROBIOL.2016.127	yes			MG-RAST	https://www.mg-rast.org/mgmain.html?mgpage=overview&metagenome=mgm4616091.3
5345	JOURNAL OF BIOTECHNOLOGY	2016	10.1016/j.jbiotec.2016.07.017	yes			MG-RAST	https://www.mg-rast.org/mgmain.html?mgpage=overview&metagenome=mgm4557667.3
5386	ENVIRONMENTAL MICROBIOLOGY	2016	10.1111/1462-2920.13132	yes			MG-RAST	https://www.mg-rast.org/mgmain.html?mgpage=search&search=4613174.3
5708	MICROBIAL ECOLOGY	2016	10.1007/s00248-016-0748-2	yes			MG-RAST	http://www.mg-rast.org/mgmain.html?mgpage=search&search=4684007.3
5774	ENVIRONMENTAL SCIENCE & TECHNOLOGY	2016	10.1021/acs.est.6b00296	yes			MG-RAST	https://www.mg-rast.org/mgmain.html?mgpage=search&search=4579369.3
5932	MOLECULAR ECOLOGY	2016	10.1111/mec.13620	yes			MG-RAST	https://www.mg-rast.org/mgmain.html?mgpage=project&project=mgp10865 e
5968	ISME JOURNAL	2016	10.1038/ismej.2015.190	yes			MG-RAST	https://www.mg-rast.org/linkin.cgi?metagenome=mgm4663447.3
5970	ISME JOURNAL	2016	10.1038/ismej.2015.183	yes			MG-RAST	https://www.mg-rast.org/mgmain.html?mgpage=search&search=4535377.3
5980	MSYSTEMS	2016	10.1128/mSystems.00003-16	yes			MG-RAST	http://www.mg-rast.org/mgmain.html?mgpage=search&search=4549281.3
6142	NATURE	2016	10.1038/nature17193	yes			MG-RAST	http://www.mg-rast.org/mgmain.html?mgpage=search&search=Piggyback-the-Winner
6156	BMC MICROBIOLOGY	2016	10.1186/s12866-016-0657-z	yes			MG-RAST	https://www.mg-rast.org/mgmain.html?mgpage=search&search=4577670.3
6163	WATER RESEARCH	2016	10.1016/j.watres.2016.01.010	yes			MG-RAST	https://www.mg-rast.org/mgmain.html?mgpage=project&project=mgp13356
6256	ISME JOURNAL	2016	10.1038/ismej.2015.150	yes			MG-RAST	https://www.mg-rast.org/mgmain.html?mgpage=search&search=4529964.3
6386	GENE	2016	10.1016/j.gene.2015.10.032	yes			MG-RAST	https://www.mg-rast.org/mgmain.html?mgpage=overview&metagenome=mgm4523017.3
6600	ISME JOURNAL	2016	10.1038/ismej.2015.82	yes			MG-RAST	https://www.mg-rast.org/mgmain.html?mgpage=search&search=4521025.3
856	ENVIRONMENTAL MICROBIOLOGY REPORTS	2018	10.1111/1758-2229.12690	yes			NCBI/ENA/DDBJ	https://www.ncbi.nlm.nih.gov/sra/SRP148450
6091	ARCHIVES OF VIROLOGY	2016	10.1007/s00705-015-2732-4	yes			NCBI/ENA/DDBJ	https://www.ncbi.nlm.nih.gov/nuccore/KT965075.1/
1023	MOLECULAR ECOLOGY RESOURCES	2018	10.1111/1755-0998.12936	yes			NCBI/ENA/DDBJ	https://www.ncbi.nlm.nih.gov/sra/DRA005015
689	ISME JOURNAL	2019	10.1038/s41396-018-0254-2	yes			NCBI/ENA/DDBJ	https://www.ncbi.nlm.nih.gov/nuccore/CP019867
6363	APPLIED AND ENVIRONMENTAL MICROBIOLOGY	2016	10.1128/AEM.03140-15	yes			NCBI/ENA/DDBJ	https://www.ncbi.nlm.nih.gov/bioproject/PRJNA192504
11	FOOD MICROBIOLOGY	2019	10.1016/j.fm.2018.12.014	yes			NCBI/ENA/DDBJ	https://www.ncbi.nlm.nih.gov/sra/SRP165151
13	FOOD MICROBIOLOGY	2019	10.1016/j.fm.2018.12.007	yes			NCBI/ENA/DDBJ	https://www.ncbi.nlm.nih.gov/sra/SRX4505698[accn]
18	WATER RESEARCH	2019	10.1016/j.watres.2019.02.020	yes			NCBI/ENA/DDBJ	https://www.ncbi.nlm.nih.gov/sra/?term=SAMN06957052
19	SCIENCE OF THE TOTAL ENVIRONMENT	2019	10.1016/j.scitotenv.2019.02.032	yes			NCBI/ENA/DDBJ	https://www.ncbi.nlm.nih.gov/sra/?term=PRJNA517751
27	3 BIOTECH	2019	10.1007/s13205-019-1698-4	yes			NCBI/ENA/DDBJ	https://www.ncbi.nlm.nih.gov/sra/SRX3203327
31	CHEMOSPHERE	2019	10.1016/j.chemosphere.2019.01.139	yes			NCBI/ENA/DDBJ	https://www.ncbi.nlm.nih.gov/sra/?term=SRP090075
32	CHEMOSPHERE	2019	10.1016/j.chemosphere.2019.02.006	yes			NCBI/ENA/DDBJ	https://www.ncbi.nlm.nih.gov/sra/SRP133610
41	WATER RESEARCH	2019	10.1016/j.watres.2019.01.032	yes			NCBI/ENA/DDBJ	https://www.ncbi.nlm.nih.gov/bioproject/PRJNA487710
66	FRONTIERS IN CELLULAR AND INFECTION MICROBIOLOGY	2019	10.3389/fcimb.2019.00090	yes			NCBI/ENA/DDBJ	https://www.ncbi.nlm.nih.gov/sra/SRP118759
71	INTERNATIONAL JOURNAL OF FOOD MICROBIOLOGY	2019	10.1016/j.ijfoodmicro.2019.01.011	yes			NCBI/ENA/DDBJ	https://www.ncbi.nlm.nih.gov/sra/SRX3463078
75	ENVIRONMENTAL MICROBIOLOGY	2019	10.1111/1462-2920.14527	yes			NCBI/ENA/DDBJ	https://www.ncbi.nlm.nih.gov/bioproject/PRJNA479783/
77	ENVIRONMENTAL MICROBIOLOGY	2019	10.1111/1462-2920.14568	yes			NCBI/ENA/DDBJ	https://www.ncbi.nlm.nih.gov/bioproject/PRJNA418890
84	APPLIED MICROBIOLOGY AND BIOTECHNOLOGY	2019	10.1007/s00253-019-09695-1	yes			NCBI/ENA/DDBJ	https://www.ncbi.nlm.nih.gov/search/all/?term=KR149567.1
98	MICROBIOME	2019	10.1186/s40168-019-0672-z	yes			NCBI/ENA/DDBJ	https://www.ncbi.nlm.nih.gov/sra?linkname=bioproject_sra_all&from_uid=525405
115	ENVIRONMENTAL MICROBIOLOGY REPORTS	2019	10.1111/1758-2229.12740	yes			NCBI/ENA/DDBJ	https://www.ncbi.nlm.nih.gov/bioproject/PRJNA469236
121	NATURE MICROBIOLOGY	2019	10.1038/s41564-019-0363-3	yes			NCBI/ENA/DDBJ	https://www.ncbi.nlm.nih.gov/bioproject/PRJNA472146
122	NATURE MICROBIOLOGY	2019	10.1038/s41564-019-0362-4	yes			NCBI/ENA/DDBJ	https://www.ncbi.nlm.nih.gov/bioproject/PRJNA492148
124	NATURE MICROBIOLOGY	2019	10.1038/s41564-018-0349-6	yes			NCBI/ENA/DDBJ	https://www.ncbi.nlm.nih.gov/sra/SRX5104156[accn]
125	NATURE MICROBIOLOGY	2019	10.1038/s41564-018-0338-9	yes			NCBI/ENA/DDBJ	https://www.ncbi.nlm.nih.gov/sra/?term=SRR1067719
127	ARCHIVES OF VIROLOGY	2019	10.1007/s00705-019-04158-4	yes			NCBI/ENA/DDBJ	https://www.ncbi.nlm.nih.gov/sra/?term=SRR7287193
128	ARCHIVES OF VIROLOGY	2019	10.1007/s00705-019-04145-9	yes			NCBI/ENA/DDBJ	https://www.ncbi.nlm.nih.gov/search/all/?term=MH536648
129	JOURNAL OF APPLIED MICROBIOLOGY	2019	10.1111/jam.14205	yes			NCBI/ENA/DDBJ	https://www.ncbi.nlm.nih.gov/sra/SRR5956171
150	CHEMOSPHERE	2019	10.1016/j.chemosphere.2019.01.028	yes			NCBI/ENA/DDBJ	https://www.ncbi.nlm.nih.gov/sra/?term=SRX2280426
154	BIORESOURCE TECHNOLOGY	2019	10.1016/j.biortech.2019.01.105	yes			NCBI/ENA/DDBJ	https://www.ncbi.nlm.nih.gov/sra/?term=SRP145746
155	BIORESOURCE TECHNOLOGY	2019	10.1016/j.biortech.2019.01.024	yes			NCBI/ENA/DDBJ	https://www.ncbi.nlm.nih.gov/bioproject/PRJEB29114
167	SCIENCE OF THE TOTAL ENVIRONMENT	2019	10.1016/j.scitotenv.2018.12.274	yes			NCBI/ENA/DDBJ	https://www.ncbi.nlm.nih.gov/sra/SRP149314
169	VIRUSES-BASEL	2019	10.3390/v11030297	yes			NCBI/ENA/DDBJ	https://www.ncbi.nlm.nih.gov/nuccore/MH370348.1/
176	JOURNAL OF BIOTECHNOLOGY	2019	10.1016/j.jbiotec.2019.01.017	yes			NCBI/ENA/DDBJ	https://www.ncbi.nlm.nih.gov/nuccore/MK410902?report=genbank
181	MICROBIOME	2019	10.1186/s40168-019-0657-y	yes			NCBI/ENA/DDBJ	https://www.ncbi.nlm.nih.gov/sra/ERX662979[accn]
184	VIROLOGY JOURNAL	2019	10.1186/s12985-019-1141-9	yes			NCBI/ENA/DDBJ	https://www.ncbi.nlm.nih.gov/nuccore/MK443496.1/
216	NATURE COMMUNICATIONS	2019	10.1038/s41467-019-08853-3	yes			NCBI/ENA/DDBJ	https://www.ncbi.nlm.nih.gov/sra/ERX1796020[accn]
217	VIRUSES-BASEL	2019	10.3390/v11030233	yes			NCBI/ENA/DDBJ	https://www.ncbi.nlm.nih.gov/nuccore/MK533146
221	SCIENTIFIC REPORTS	2019	10.1038/s41598-019-40171-y	yes			NCBI/ENA/DDBJ	https://www.ncbi.nlm.nih.gov/bioproject/PRJNA429331
222	VIRUSES-BASEL	2019	10.3390/v11030222	yes			NCBI/ENA/DDBJ	https://www.ncbi.nlm.nih.gov/search/all/?term=MH703045
226	NATURE COMMUNICATIONS	2019	10.1038/s41467-019-08973-w	yes			NCBI/ENA/DDBJ	https://www.ebi.ac.uk/ena/data/view/ERX2541940
261	SYSTEMATIC AND APPLIED MICROBIOLOGY	2019	10.1016/j.syapm.2018.10.001	yes			NCBI/ENA/DDBJ	https://www.ncbi.nlm.nih.gov/nuccore/NPIZ00000000
262	SYSTEMATIC AND APPLIED MICROBIOLOGY	2019	10.1016/j.syapm.2018.10.008	yes			NCBI/ENA/DDBJ	https://www.ncbi.nlm.nih.gov/nuccore/MPBG00000000.1/
266	VIROLOGY	2019	10.1016/j.virol.2019.01.010	yes			NCBI/ENA/DDBJ	https://www.ncbi.nlm.nih.gov/sra/?term=SRP126625
271	MOLECULAR ECOLOGY RESOURCES	2019	10.1111/1755-0998.12979	yes			NCBI/ENA/DDBJ	https://www.ncbi.nlm.nih.gov/sra/SRX2997158[accn]
274	ARCHIVES OF VIROLOGY	2019	10.1007/s00705-018-04141-5	yes			NCBI/ENA/DDBJ	https://www.ncbi.nlm.nih.gov/nuccore/AM749299.1/
280	APPLIED AND ENVIRONMENTAL MICROBIOLOGY	2019	10.1128/AEM.02301-18	yes			NCBI/ENA/DDBJ	https://www.ncbi.nlm.nih.gov/bioproject/PRJNA509633
285	ISME JOURNAL	2019	10.1038/s41396-018-0290-y	yes			NCBI/ENA/DDBJ	https://www.ncbi.nlm.nih.gov/sra/?term=SRP134228
286	ISME JOURNAL	2019	10.1038/s41396-018-0289-4	yes			NCBI/ENA/DDBJ	https://www.ncbi.nlm.nih.gov/bioproject/PRJNA350692
287	ISME JOURNAL	2019	10.1038/s41396-018-0282-y	yes			NCBI/ENA/DDBJ	https://www.ncbi.nlm.nih.gov/bioproject/PRJNA481422
291	NATURE MICROBIOLOGY	2019	10.1038/s41564-018-0313-5	yes			NCBI/ENA/DDBJ	https://www.ncbi.nlm.nih.gov/nuccore/MH883365
292	NATURE MICROBIOLOGY	2019	10.1038/s41564-018-0321-5	yes			NCBI/ENA/DDBJ	https://www.ncbi.nlm.nih.gov/bioproject/PRJNA497734
293	EXTREMOPHILES	2019	10.1007/s00792-018-01073-5	yes			NCBI/ENA/DDBJ	https://www.ncbi.nlm.nih.gov/nuccore/QUAH01000001.1?report=fasta
294	EXTREMOPHILES	2019	10.1007/s00792-019-01078-8	yes			NCBI/ENA/DDBJ	https://www.ncbi.nlm.nih.gov/search/all/?term=SAMN09522127
297	SCIENCE OF THE TOTAL ENVIRONMENT	2019	10.1016/j.scitotenv.2018.11.056	yes			NCBI/ENA/DDBJ	https://www.ncbi.nlm.nih.gov/nuccore/KBWT00000000.1
309	MICROBIOME	2019	10.1186/s40168-019-0648-z	yes			NCBI/ENA/DDBJ	https://www.ncbi.nlm.nih.gov/bioproject/PRJNA515946
313	NATURE COMMUNICATIONS	2019	10.1038/s41467-019-08864-0	yes			NCBI/ENA/DDBJ	https://www.ncbi.nlm.nih.gov/bioproject/PRJEB27640
316	BMC GENOMICS	2019	10.1186/s12864-019-5543-2	yes			NCBI/ENA/DDBJ	https://www.ncbi.nlm.nih.gov/bioproject/PRJNA494391
323	FRONTIERS IN CELLULAR AND INFECTION MICROBIOLOGY	2019	10.3389/fcimb.2019.00034	yes			NCBI/ENA/DDBJ	https://www.ncbi.nlm.nih.gov/sra/SRX5391619[accn]
326	SCIENCE OF THE TOTAL ENVIRONMENT	2019	10.1016/j.scitotenv.2018.10.355	yes			NCBI/ENA/DDBJ	https://www.ncbi.nlm.nih.gov/sra/SRP094732
329	SCIENCE OF THE TOTAL ENVIRONMENT	2019	10.1016/j.scitotenv.2018.10.410	yes			NCBI/ENA/DDBJ	https://www.ncbi.nlm.nih.gov/sra/SRP158833
343	FRONTIERS IN CELLULAR AND INFECTION MICROBIOLOGY	2019	10.3389/fcimb.2019.00028	yes			NCBI/ENA/DDBJ	https://www.ebi.ac.uk/ena/data/view/PRJEB29237
360	FRONTIERS IN MARINE SCIENCE	2019	10.3389/fmars.2019.00048	yes			NCBI/ENA/DDBJ	https://www.ncbi.nlm.nih.gov/sra/SRX4395115[accn]
371	SCIENTIFIC DATA	2019	10.1038/sdata.2019.8	yes			NCBI/ENA/DDBJ	https://www.ncbi.nlm.nih.gov/sra/SRP153411
378	FRONTIERS IN MICROBIOLOGY	2019	10.3389/fmicb.2019.00165	yes			NCBI/ENA/DDBJ	https://www.ncbi.nlm.nih.gov/sra/SRP155721
398	GIGASCIENCE	2019	10.1093/gigascience/giy165	yes			NCBI/ENA/DDBJ	https://www.ncbi.nlm.nih.gov/search/all/?term=SRP115095
408	GENES	2019	10.3390/genes10020101	yes			NCBI/ENA/DDBJ	https://www.ncbi.nlm.nih.gov/nuccore/KY931681.1/
410	MICROBIAL ECOLOGY	2019	10.1007/s00248-018-01313-3	yes			NCBI/ENA/DDBJ	https://www.ncbi.nlm.nih.gov/sra/SRX4388011
412	VIRUSES-BASEL	2019	10.3390/v11020094	yes			NCBI/ENA/DDBJ	https://www.ncbi.nlm.nih.gov/sra/?term=PRJNA329428
413	VIRUSES-BASEL	2019	10.3390/v11020147	yes			NCBI/ENA/DDBJ	https://www.ncbi.nlm.nih.gov/search/all/?term=MK133923
414	VIRUSES-BASEL	2019	10.3390/v11020095	yes			NCBI/ENA/DDBJ	https://www.ncbi.nlm.nih.gov/sra/?term=PRJNA505984
422	MOLECULAR ECOLOGY	2019	10.1111/mec.14834	yes			NCBI/ENA/DDBJ	https://www.ncbi.nlm.nih.gov/sra/?term=SRP128534
432	VIROLOGY	2019	10.1016/j.virol.2018.12.009	yes			NCBI/ENA/DDBJ	https://www.ncbi.nlm.nih.gov/nuccore/MH324435.1/
433	APPLIED MICROBIOLOGY AND BIOTECHNOLOGY	2019	10.1007/s00253-018-9542-z	yes			NCBI/ENA/DDBJ	https://www.ncbi.nlm.nih.gov/sra/?term=SRR5453780
440	ARCHIVES OF VIROLOGY	2019	10.1007/s00705-018-4101-6	yes			NCBI/ENA/DDBJ	https://www.ncbi.nlm.nih.gov/nuccore/MH760796.1/
443	WATER RESEARCH	2019	10.1016/j.watres.2018.11.012	yes			NCBI/ENA/DDBJ	https://www.ncbi.nlm.nih.gov/bioproject/PRJNA480846
450	JOURNAL OF GENERAL VIROLOGY	2019	10.1099/jgv.0.001219	yes			NCBI/ENA/DDBJ	https://www.ncbi.nlm.nih.gov/nuccore/MK100569
459	MICROBIOME	2019	10.1186/s40168-019-0629-2	yes			NCBI/ENA/DDBJ	https://www.ncbi.nlm.nih.gov/sra/SRX4317510[accn]
473	NATURE MICROBIOLOGY	2019	10.1038/s41564-018-0306-4	yes			NCBI/ENA/DDBJ	https://www.ncbi.nlm.nih.gov/sra/SRX3558893[accn]
476	CHEMOSPHERE	2019	10.1016/j.chemosphere.2018.10.210	yes			NCBI/ENA/DDBJ	https://www.ncbi.nlm.nih.gov/sra/SRX2387512[accn]
479	JOURNAL OF APPLIED MICROBIOLOGY	2019	10.1111/jam.14139	yes			NCBI/ENA/DDBJ	https://www.ncbi.nlm.nih.gov/sra/SRX4140801
480	JOURNAL OF APPLIED MICROBIOLOGY	2019	10.1111/jam.14147	yes			NCBI/ENA/DDBJ	https://www.ncbi.nlm.nih.gov/search/all/?term=SRP146071
497	SCIENCE OF THE TOTAL ENVIRONMENT	2019	10.1016/j.scitotenv.2018.08.388	yes			NCBI/ENA/DDBJ	https://www.ncbi.nlm.nih.gov/sra/?term=SRR4308828
499	NATURE COMMUNICATIONS	2019	10.1038/s41467-019-08463-z	yes			NCBI/ENA/DDBJ	https://www.ncbi.nlm.nih.gov/bioproject/PRJNA438384
509	MICROBIOME	2019	10.1186/s40168-019-0623-8	yes			NCBI/ENA/DDBJ	https://www.ncbi.nlm.nih.gov/sra/?term=SRR7268657
513	NATURE COMMUNICATIONS	2019	10.1038/s41467-019-08303-0	yes			NCBI/ENA/DDBJ	https://www.ncbi.nlm.nih.gov/sra/SRP150166
523	BMC GENOMICS	2019	10.1186/s12864-018-5419-x	yes			NCBI/ENA/DDBJ	https://www.ncbi.nlm.nih.gov/bioproject/PRJNA511412
531	SCIENCE OF THE TOTAL ENVIRONMENT	2019	10.1016/j.scitotenv.2018.08.185	yes			NCBI/ENA/DDBJ	https://www.ncbi.nlm.nih.gov/bioproject/382755
541	SCIENCE	2019	10.1126/science.aau5238	yes			NCBI/ENA/DDBJ	https://www.ncbi.nlm.nih.gov/bioproject/PRJNA496358
550	SCIENCE OF THE TOTAL ENVIRONMENT	2019	10.1016/j.scitotenv.2018.08.045	yes			NCBI/ENA/DDBJ	https://www.ncbi.nlm.nih.gov/sra/SRX4487725[accn]
556	SCIENTIFIC REPORTS	2019	10.1038/s41598-018-36673-w	yes			NCBI/ENA/DDBJ	https://www.ncbi.nlm.nih.gov/search/all/?term=REGX01000000
557	FRONTIERS IN MICROBIOLOGY	2019	10.3389/fmicb.2018.03297	yes			NCBI/ENA/DDBJ	https://www.ncbi.nlm.nih.gov/sra/?term=SRP136696
571	SCIENCE	2019	10.1126/science.aau9343	yes			NCBI/ENA/DDBJ	https://www.ncbi.nlm.nih.gov/bioproject/PRJNA482054
595	MSPHERE	2019	10.1128/mSphere.00529-18	yes			NCBI/ENA/DDBJ	https://www.ncbi.nlm.nih.gov/bioproject/PRJEB23689
596	MSPHERE	2019	10.1128/mSphereDirect.00011-19	yes			NCBI/ENA/DDBJ	https://www.ncbi.nlm.nih.gov/sra/SRX3985722[accn]
597	MSPHERE	2019	10.1128/mSphere.00585-18	yes			NCBI/ENA/DDBJ	https://www.ncbi.nlm.nih.gov/bioproject/PRJNA491626
598	MBIO	2019	10.1128/mBio.02262-18	yes			NCBI/ENA/DDBJ	https://www.ncbi.nlm.nih.gov/bioproject/PRJNA474932
599	MBIO	2019	10.1128/mBio.01966-18	yes			NCBI/ENA/DDBJ	https://www.ncbi.nlm.nih.gov/nuccore/KY931670
600	MBIO	2019	10.1128/mBio.02189-18	yes			NCBI/ENA/DDBJ	https://www.ncbi.nlm.nih.gov/bioproject/PRJNA412436
606	MSYSTEMS	2019	10.1128/mSystems.00337-18	yes			NCBI/ENA/DDBJ	https://www.ncbi.nlm.nih.gov/sra?linkname=bioproject_sra_all&from_uid=494016
617	MOLECULAR ECOLOGY	2019	10.1111/mec.14860	yes			NCBI/ENA/DDBJ	https://www.ncbi.nlm.nih.gov/bioproject/PRJEB7375
627	MOLECULAR ECOLOGY RESOURCES	2019	10.1111/1755-0998.12946	yes			NCBI/ENA/DDBJ	https://www.ebi.ac.uk/ena/data/view/PRJEB28138
636	SYSTEMATIC AND APPLIED MICROBIOLOGY	2019	10.1016/j.syapm.2018.08.007	yes			NCBI/ENA/DDBJ	https://www.ncbi.nlm.nih.gov/bioproject/PRJNA367155
637	SYSTEMATIC AND APPLIED MICROBIOLOGY	2019	10.1016/j.syapm.2018.12.003	yes			NCBI/ENA/DDBJ	https://www.ncbi.nlm.nih.gov/search/all/?term=PRJNA386568
638	SYSTEMATIC AND APPLIED MICROBIOLOGY	2019	10.1016/j.syapm.2018.08.013	yes			NCBI/ENA/DDBJ	https://www.ncbi.nlm.nih.gov/sra/SRR710274
639	SYSTEMATIC AND APPLIED MICROBIOLOGY	2019	10.1016/j.syapm.2018.08.001	yes			NCBI/ENA/DDBJ	https://www.ncbi.nlm.nih.gov/sra/ERX2678924[accn]
640	SYSTEMATIC AND APPLIED MICROBIOLOGY	2019	10.1016/j.syapm.2018.11.002	yes			NCBI/ENA/DDBJ	https://www.ncbi.nlm.nih.gov/bioproject/PRJNA483775
646	ARCHIVES OF VIROLOGY	2019	10.1007/s00705-018-4037-x	yes			NCBI/ENA/DDBJ	https://www.ncbi.nlm.nih.gov/sra/?term=SRR7285959
647	ARCHIVES OF VIROLOGY	2019	10.1007/s00705-018-4031-3	yes			NCBI/ENA/DDBJ	https://www.ncbi.nlm.nih.gov/search/all/?term=MH425569
664	APPLIED AND ENVIRONMENTAL MICROBIOLOGY	2019	10.1128/AEM.02404-18	yes			NCBI/ENA/DDBJ	https://www.ncbi.nlm.nih.gov/nuccore/MF158200
670	MICROBIAL ECOLOGY	2019	10.1007/s00248-018-1214-0	yes			NCBI/ENA/DDBJ	https://www.ncbi.nlm.nih.gov/sra/SRP098951
693	ISME JOURNAL	2019	10.1038/s41396-018-0263-1	yes			NCBI/ENA/DDBJ	https://www.ncbi.nlm.nih.gov/bioproject/PRJNA248084/
696	APPLIED AND ENVIRONMENTAL MICROBIOLOGY	2019	10.1128/AEM.02212-18	yes			NCBI/ENA/DDBJ	https://www.ncbi.nlm.nih.gov/sra/SRP144630
697	APPLIED AND ENVIRONMENTAL MICROBIOLOGY	2019	10.1128/AEM.01311-18	yes			NCBI/ENA/DDBJ	https://www.ncbi.nlm.nih.gov/nuccore/MG209611
702	WATER RESEARCH	2019	10.1016/j.watres.2018.10.061	yes			NCBI/ENA/DDBJ	https://www.ncbi.nlm.nih.gov/sra/?term=SRR6924042
704	BIORESOURCE TECHNOLOGY	2019	10.1016/j.biortech.2018.10.017	yes			NCBI/ENA/DDBJ	https://www.ncbi.nlm.nih.gov/sra/?term=SAMN10095206
714	PLOS ONE	2018	10.1371/journal.pone.0209683	yes			NCBI/ENA/DDBJ	https://ddbj.nig.ac.jp/DRASearch/accessionList?type=submission&page=6
715	BMC GENOMICS	2018	10.1186/s12864-018-5306-5	yes			NCBI/ENA/DDBJ	https://www.ncbi.nlm.nih.gov/sra/?term=SRS1096464
717	PROCEEDINGS OF THE NATIONAL ACADEMY OF SCIENCES OF THE UNITED STATES OF AMERICA	2018	10.1073/pnas.1809700115	yes			NCBI/ENA/DDBJ	https://www.ncbi.nlm.nih.gov/sra/SRP139967
733	PROCEEDINGS OF THE NATIONAL ACADEMY OF SCIENCES OF THE UNITED STATES OF AMERICA	2018	10.1073/pnas.1812668115	yes			NCBI/ENA/DDBJ	https://www.ncbi.nlm.nih.gov/sra/?term=SRP101805
734	PROCEEDINGS OF THE NATIONAL ACADEMY OF SCIENCES OF THE UNITED STATES OF AMERICA	2018	10.1073/pnas.1810550115	yes			NCBI/ENA/DDBJ	https://www.ncbi.nlm.nih.gov/sra/?term=DRA005967
737	MICROBIOME	2018	10.1186/s40168-018-0611-4	yes			NCBI/ENA/DDBJ	https://www.ncbi.nlm.nih.gov/sra/ERX2404200[accn]
740	WATER RESEARCH	2018	10.1016/j.watres.2018.10.026	yes			NCBI/ENA/DDBJ	https://www.ncbi.nlm.nih.gov/sra/SRX3565941[accn]
745	BMC MICROBIOLOGY	2018	10.1186/s12866-018-1343-0	yes			NCBI/ENA/DDBJ	https://www.ncbi.nlm.nih.gov/sra/SRX4522969[accn]
762	MICROBIOME	2018	10.1186/s40168-018-0592-3	yes			NCBI/ENA/DDBJ	https://www.ncbi.nlm.nih.gov/bioproject/PRJNA427101
764	FRONTIERS IN MICROBIOLOGY	2018	10.3389/fmicb.2018.03012	yes			NCBI/ENA/DDBJ	https://www.ncbi.nlm.nih.gov/bioproject/PRJNA291769
801	MICROBIOLOGYOPEN	2018	10.1002/mbo3.716	yes			NCBI/ENA/DDBJ	https://www.ebi.ac.uk/ena/data/view/ERR2286968
806	FEMS MICROBIOLOGY ECOLOGY	2018	10.1093/femsec/fiy185	yes			NCBI/ENA/DDBJ	https://www.ncbi.nlm.nih.gov/bioproject/PRJEB26992
807	FEMS MICROBIOLOGY ECOLOGY	2018	10.1093/femsec/fiy184	yes			NCBI/ENA/DDBJ	https://www.ncbi.nlm.nih.gov/sra/SRX1998212
816	VIROLOGY	2018	10.1016/j.virol.2018.09.023	yes			NCBI/ENA/DDBJ	https://www.ncbi.nlm.nih.gov/nuccore/MH713703
818	INFECTION GENETICS AND EVOLUTION	2018	10.1016/j.meegid.2018.09.002	yes			NCBI/ENA/DDBJ	https://www.ncbi.nlm.nih.gov/nuccore/KY888269.1/
819	INFECTION GENETICS AND EVOLUTION	2018	10.1016/j.meegid.2018.09.013	yes			NCBI/ENA/DDBJ	https://www.ncbi.nlm.nih.gov/nuccore/CP025785
821	INFECTION GENETICS AND EVOLUTION	2018	10.1016/j.meegid.2018.10.004	yes			NCBI/ENA/DDBJ	https://www.ncbi.nlm.nih.gov/nuccore/LC386152.1/
831	APPLIED AND ENVIRONMENTAL MICROBIOLOGY	2018	10.1128/AEM.01678-18	yes			NCBI/ENA/DDBJ	https://www.ncbi.nlm.nih.gov/bioproject/PRJNA362825
836	JOURNAL OF GENERAL VIROLOGY	2018	10.1099/jgv.0.001165	yes			NCBI/ENA/DDBJ	https://www.ncbi.nlm.nih.gov/nuccore/MH719095
841	JOURNAL OF CLINICAL MICROBIOLOGY	2018	10.1128/JCM.01123-18	yes			NCBI/ENA/DDBJ	https://www.ncbi.nlm.nih.gov/sra?LinkName=biosample_sra&from_uid=5713695
854	APPLIED AND ENVIRONMENTAL MICROBIOLOGY	2018	10.1128/AEM.01562-18	yes			NCBI/ENA/DDBJ	https://www.ncbi.nlm.nih.gov/bioproject/PRJEB25954
858	JOURNAL OF APPLIED MICROBIOLOGY	2018	10.1111/jam.14059	yes			NCBI/ENA/DDBJ	https://www.ncbi.nlm.nih.gov/bioproject/PRJNA389337
860	VIRUS GENES	2018	10.1007/s11262-018-1599-3	yes			NCBI/ENA/DDBJ	https://www.ncbi.nlm.nih.gov/nuccore/MG923683.1/
861	ARCHIVES OF VIROLOGY	2018	10.1007/s00705-018-4022-4	yes			NCBI/ENA/DDBJ	https://www.ncbi.nlm.nih.gov/sra/SRR7686970
863	ARCHIVES OF VIROLOGY	2018	10.1007/s00705-018-4012-6	yes			NCBI/ENA/DDBJ	https://www.ncbi.nlm.nih.gov/nuccore/MH327933.1/
865	ENVIRONMENTAL POLLUTION	2018	10.1016/j.envpol.2018.09.080	yes			NCBI/ENA/DDBJ	https://www.ncbi.nlm.nih.gov/bioproject/PRJNA398360
874	CHEMOSPHERE	2018	10.1016/j.chemosphere.2018.09.066	yes			NCBI/ENA/DDBJ	https://www.ncbi.nlm.nih.gov/sra/SRX2672503[accn]
881	FOOD MICROBIOLOGY	2018	10.1016/j.fm.2018.04.004	yes			NCBI/ENA/DDBJ	https://www.ncbi.nlm.nih.gov/sra/SRX2914316
883	FOOD MICROBIOLOGY	2018	10.1016/j.fm.2018.06.010	yes			NCBI/ENA/DDBJ	https://www.ncbi.nlm.nih.gov/sra/ERX2360748[accn]
886	NATURE COMMUNICATIONS	2018	10.1038/s41467-018-07631-x	yes			NCBI/ENA/DDBJ	https://www.ncbi.nlm.nih.gov/sra/SRX4573365[accn]
896	SCIENTIFIC REPORTS	2018	10.1038/s41598-018-35940-0	yes			NCBI/ENA/DDBJ	https://www.ncbi.nlm.nih.gov/sra/?term=PRJNA389253
898	FRONTIERS IN MICROBIOLOGY	2018	10.3389/fmicb.2018.02909	yes			NCBI/ENA/DDBJ	https://www.ncbi.nlm.nih.gov/nuccore/NCRO00000000.1
907	NATURE COMMUNICATIONS	2018	10.1038/s41467-018-07426-0	yes			NCBI/ENA/DDBJ	https://www.ncbi.nlm.nih.gov/bioproject/PRJNA494922/
910	NATURE COMMUNICATIONS	2018	10.1038/s41467-018-07240-8	yes			NCBI/ENA/DDBJ	https://www.ncbi.nlm.nih.gov/bioproject/PRJNA46333
916	FRONTIERS IN MARINE SCIENCE	2018	10.3389/fmars.2018.00436	yes			NCBI/ENA/DDBJ	https://www.ncbi.nlm.nih.gov/search/all/?term=SRP095762
917	ENVIRONMENTAL SCIENCE & TECHNOLOGY	2018	10.1021/acs.est.8b03052	yes			NCBI/ENA/DDBJ	https://www.ncbi.nlm.nih.gov/sra/?term=PRJNA450451
918	ENVIRONMENTAL SCIENCE & TECHNOLOGY	2018	10.1021/acs.est.8b03853	yes			NCBI/ENA/DDBJ	https://www.ncbi.nlm.nih.gov/sra/SRP131706
920	BMC MICROBIOLOGY	2018	10.1186/s12866-018-1331-4	yes			NCBI/ENA/DDBJ	https://www.ncbi.nlm.nih.gov/bioproject/PRJEB25747
924	BMC MICROBIOLOGY	2018	10.1186/s12866-018-1323-4	yes			NCBI/ENA/DDBJ	https://www.ncbi.nlm.nih.gov/bioproject/PRJNA382370
927	SCIENCE	2018	10.1126/science.aav4294	yes			NCBI/ENA/DDBJ	https://www.ncbi.nlm.nih.gov/nuccore/MK005734
964	MSYSTEMS	2018	10.1128/mSystems.00150-18	yes			NCBI/ENA/DDBJ	https://www.ncbi.nlm.nih.gov/bioproject/PRJNA506133
966	MSYSTEMS	2018	10.1128/mSystems.00200-18	yes			NCBI/ENA/DDBJ	https://www.ncbi.nlm.nih.gov/sra/SRX5008036[accn]
968	MSYSTEMS	2018	10.1128/mSystems.00177-18	yes			NCBI/ENA/DDBJ	https://www.ebi.ac.uk/ena/data/view/PRJEB21090
969	MSYSTEMS	2018	10.1128/mSystems.00131-18	yes			NCBI/ENA/DDBJ	https://www.ncbi.nlm.nih.gov/bioproject/PRJNA481165
970	MSYSTEMS	2018	10.1128/mSystems.00221-18	yes			NCBI/ENA/DDBJ	https://www.ncbi.nlm.nih.gov/bioproject/PRJNA418244
974	MBIO	2018	10.1128/mBio.02032-18	yes			NCBI/ENA/DDBJ	https://www.ncbi.nlm.nih.gov/sra/PRJNA491522
975	MBIO	2018	10.1128/mBio.01631-18	yes			NCBI/ENA/DDBJ	https://www.ncbi.nlm.nih.gov/bioproject/PRJNA383868
976	MBIO	2018	10.1128/mBio.02248-18	yes			NCBI/ENA/DDBJ	https://www.ncbi.nlm.nih.gov/sra/SRX2900807[accn]
977	MBIO	2018	10.1128/mBio.00815-18	yes			NCBI/ENA/DDBJ	https://www.ncbi.nlm.nih.gov/bioproject/338276
980	MSPHERE	2018	10.1128/mSphereDirect.00588-18	yes			NCBI/ENA/DDBJ	https://www.ncbi.nlm.nih.gov/bioproject/PRJNA446061
981	MSPHERE	2018	10.1128/mSphereDirect.00645-18	yes			NCBI/ENA/DDBJ	https://www.ncbi.nlm.nih.gov/bioproject/396064
984	FEMS MICROBIOLOGY ECOLOGY	2018	10.1093/femsec/fiy167	yes			NCBI/ENA/DDBJ	https://www.ncbi.nlm.nih.gov/biosample/SAMN06640312/
1012	ENVIRONMENTAL MICROBIOLOGY	2018	10.1111/1462-2920.14404	yes			NCBI/ENA/DDBJ	https://www.ncbi.nlm.nih.gov/bioproject/PRJNA278476
1026	APPLIED MICROBIOLOGY AND BIOTECHNOLOGY	2018	10.1007/s00253-018-9274-0	yes			NCBI/ENA/DDBJ	https://www.ncbi.nlm.nih.gov/sra/?term=SRP122263
1037	INFECTION GENETICS AND EVOLUTION	2018	10.1016/j.meegid.2018.07.010	yes			NCBI/ENA/DDBJ	https://www.ncbi.nlm.nih.gov/nuccore/MH133313.1/
1038	INFECTION GENETICS AND EVOLUTION	2018	10.1016/j.meegid.2018.07.029	yes			NCBI/ENA/DDBJ	https://www.ncbi.nlm.nih.gov/nuccore/MH330682
1039	NATURE MICROBIOLOGY	2018	10.1038/s41564-018-0257-9	yes			NCBI/ENA/DDBJ	https://www.ebi.ac.uk/ena/data/view/ERR1995211
1040	NATURE MICROBIOLOGY	2018	10.1038/s41564-018-0225-4	yes			NCBI/ENA/DDBJ	https://www.ncbi.nlm.nih.gov/bioproject/PRJNA301235
1041	NATURE MICROBIOLOGY	2018	10.1038/s41564-018-0242-3	yes			NCBI/ENA/DDBJ	https://www.ncbi.nlm.nih.gov/sra/ERX2428299[accn]
1046	INTERNATIONAL JOURNAL OF BIOLOGICAL MACROMOLECULES	2018	10.1016/j.ijbiomac.2018.07.170	yes			NCBI/ENA/DDBJ	https://www.ncbi.nlm.nih.gov/nuccore/GU331882
1047	INTERNATIONAL JOURNAL OF BIOLOGICAL MACROMOLECULES	2018	10.1016/j.ijbiomac.2018.07.196	yes			NCBI/ENA/DDBJ	https://www.ncbi.nlm.nih.gov/sra/SRP152290
1057	JOURNAL OF APPLIED MICROBIOLOGY	2018	10.1111/jam.14046	yes			NCBI/ENA/DDBJ	https://www.ncbi.nlm.nih.gov/bioproject/PRJEB22115
1058	MICROBIAL ECOLOGY	2018	10.1007/s00248-018-1178-0	yes			NCBI/ENA/DDBJ	https://www.ncbi.nlm.nih.gov/bioproject/PRJNA350288
1060	ARCHIVES OF VIROLOGY	2018	10.1007/s00705-018-3945-0	yes			NCBI/ENA/DDBJ	https://www.ncbi.nlm.nih.gov/nuccore/KX034981
1061	ARCHIVES OF VIROLOGY	2018	10.1007/s00705-018-3975-7	yes			NCBI/ENA/DDBJ	https://www.ncbi.nlm.nih.gov/search/all/?term=MH338171
1063	EXTREMOPHILES	2018	10.1007/s00792-018-1047-2	yes			NCBI/ENA/DDBJ	https://www.ncbi.nlm.nih.gov/bioproject/PRJNA415251
1065	ENVIRONMENTAL POLLUTION	2018	10.1016/j.envpol.2018.07.024	yes			NCBI/ENA/DDBJ	https://www.ncbi.nlm.nih.gov/sra/SRX3525360[accn]
1073	BIORESOURCE TECHNOLOGY	2018	10.1016/j.biortech.2018.07.051	yes			NCBI/ENA/DDBJ	https://www.ncbi.nlm.nih.gov/popset/?term=HQ133054
1075	SCIENCE OF THE TOTAL ENVIRONMENT	2018	10.1016/j.scitotenv.2018.05.375	yes			NCBI/ENA/DDBJ	https://www.ncbi.nlm.nih.gov/bioproject/PRJNA430815
1077	PLOS ONE	2018	10.1371/journal.pone.0205575	yes			NCBI/ENA/DDBJ	https://www.ncbi.nlm.nih.gov/bioproject/PRJEB26884
1080	MICROBIOME	2018	10.1186/s40168-018-0575-4	yes			NCBI/ENA/DDBJ	https://www.ncbi.nlm.nih.gov/sra/SRP141397
1081	PROCEEDINGS OF THE NATIONAL ACADEMY OF SCIENCES OF THE UNITED STATES OF AMERICA	2018	10.1073/pnas.1806425115	yes			NCBI/ENA/DDBJ	https://www.ncbi.nlm.nih.gov/sra/SRR2053273
1083	PEERJ	2018	10.7717/peerj.5826	yes			NCBI/ENA/DDBJ	https://www.ncbi.nlm.nih.gov/sra/SRX3481343[accn]
1100	NATURE	2018	10.1038/s41586-018-0620-2	yes			NCBI/ENA/DDBJ	https://www.ncbi.nlm.nih.gov/sra?linkname=bioproject_sra_all&from_uid=400115
1103	FRONTIERS IN CELLULAR AND INFECTION MICROBIOLOGY	2018	10.3389/fcimb.2018.00359	yes			NCBI/ENA/DDBJ	https://www.ncbi.nlm.nih.gov/sra/SRR7204303
1114	BMC MICROBIOLOGY	2018	10.1186/s12866-018-1275-8	yes			NCBI/ENA/DDBJ	https://www.ncbi.nlm.nih.gov/sra/?term=SRS1075014
1115	MICROBIOME	2018	10.1186/s40168-018-0561-x	yes			NCBI/ENA/DDBJ	https://www.ncbi.nlm.nih.gov/bioproject/PRJNA385062
1118	MICROBIOME	2018	10.1186/s40168-018-0572-7	yes			NCBI/ENA/DDBJ	https://www.ncbi.nlm.nih.gov/sra/SRX3944670[accn]
1128	PROCEEDINGS OF THE NATIONAL ACADEMY OF SCIENCES OF THE UNITED STATES OF AMERICA	2018	10.1073/pnas.1808176115	yes			NCBI/ENA/DDBJ	https://www.ncbi.nlm.nih.gov/sra/SRX4387657
1131	NATURE COMMUNICATIONS	2018	10.1038/s41467-018-06502-9	yes			NCBI/ENA/DDBJ	https://www.ncbi.nlm.nih.gov/sra/SRR6287056
1132	INTERNATIONAL JOURNAL OF BIOLOGICAL MACROMOLECULES	2018	10.1016/j.ijbiomac.2018.06.141	yes			NCBI/ENA/DDBJ	https://www.ncbi.nlm.nih.gov/nuccore/KX844818
1142	MICROBIOME	2018	10.1186/s40168-018-0562-9	yes			NCBI/ENA/DDBJ	https://www.ncbi.nlm.nih.gov/bioproject/PRJNA255937
1148	PLOS ONE	2018	10.1371/journal.pone.0205068	yes			NCBI/ENA/DDBJ	https://www.ncbi.nlm.nih.gov/search/all/?term=SRP127615
1155	NATURE COMMUNICATIONS	2018	10.1038/s41467-018-06587-2	yes			NCBI/ENA/DDBJ	https://www.ncbi.nlm.nih.gov/nuccore/MH480516.1/
1159	BMC MICROBIOLOGY	2018	10.1186/s12866-018-1266-9	yes			NCBI/ENA/DDBJ	https://www.ncbi.nlm.nih.gov/bioproject/PRJNA416453
1161	FRONTIERS IN CELLULAR AND INFECTION MICROBIOLOGY	2018	10.3389/fcimb.2018.00346	yes			NCBI/ENA/DDBJ	https://www.ncbi.nlm.nih.gov/sra?linkname=bioproject_sra_all&from_uid=415710
1163	BMC MICROBIOLOGY	2018	10.1186/s12866-018-1267-8	yes			NCBI/ENA/DDBJ	https://www.ncbi.nlm.nih.gov/bioproject/422794
1164	3 BIOTECH	2018	10.1007/s13205-018-1441-6	yes			NCBI/ENA/DDBJ	https://www.ncbi.nlm.nih.gov/bioproject/PRJNA362281
1169	ENVIRONMENTAL SCIENCE & TECHNOLOGY	2018	10.1021/acs.est.8b02599	yes			NCBI/ENA/DDBJ	https://www.ncbi.nlm.nih.gov/search/all/?term=PRJNA450161
1202	FEMS MICROBIOLOGY ECOLOGY	2018	10.1093/femsec/fiy156	yes			NCBI/ENA/DDBJ	https://www.ncbi.nlm.nih.gov/bioproject/PRJNA217310
1210	ENVIRONMENTAL MICROBIOLOGY	2018	10.1111/1462-2920.14309	yes			NCBI/ENA/DDBJ	https://www.ncbi.nlm.nih.gov/nuccore/MF942608.1/
1217	MICROBIOLOGYOPEN	2018	10.1002/mbo3.604	yes			NCBI/ENA/DDBJ	https://www.ncbi.nlm.nih.gov/bioproject/PRJNA392355
1218	MICROBIOLOGYOPEN	2018	10.1002/mbo3.601	yes			NCBI/ENA/DDBJ	https://www.ncbi.nlm.nih.gov/nuccore/MF277135
1232	APPLIED AND ENVIRONMENTAL MICROBIOLOGY	2018	10.1128/AEM.01250-18	yes			NCBI/ENA/DDBJ	https://www.ncbi.nlm.nih.gov/sra/SRX3107332[accn]
1238	VIRUS GENES	2018	10.1007/s11262-018-1585-9	yes			NCBI/ENA/DDBJ	https://www.ncbi.nlm.nih.gov/nuccore/MG837569
1243	ISME JOURNAL	2018	10.1038/s41396-018-0190-1	yes			NCBI/ENA/DDBJ	https://www.ncbi.nlm.nih.gov/bioproject/PRJNA434806
1247	VIROLOGY	2018	10.1016/j.virol.2018.07.029	yes			NCBI/ENA/DDBJ	https://www.ncbi.nlm.nih.gov/sra/SRX2950839[accn]
1250	ARCHIVES OF VIROLOGY	2018	10.1007/s00705-018-3898-3	yes			NCBI/ENA/DDBJ	https://www.ncbi.nlm.nih.gov/nuccore/LC341267.1/
1262	MICROBIAL ECOLOGY	2018	10.1007/s00248-018-1156-6	yes			NCBI/ENA/DDBJ	https://www.ncbi.nlm.nih.gov/sra/SRX3096505[accn]
1263	MICROBIAL ECOLOGY	2018	10.1007/s00248-018-1159-3	yes			NCBI/ENA/DDBJ	https://www.ncbi.nlm.nih.gov/search/all/?term=KY290137
1264	MICROBIAL ECOLOGY	2018	10.1007/s00248-018-1169-1	yes			NCBI/ENA/DDBJ	https://www.ncbi.nlm.nih.gov/bioproject/PRJNA383664
1272	SCIENCE OF THE TOTAL ENVIRONMENT	2018	10.1016/j.scitotenv.2018.05.037	yes			NCBI/ENA/DDBJ	https://www.ncbi.nlm.nih.gov/sra/?term=SAMN08038921
1273	SCIENCE OF THE TOTAL ENVIRONMENT	2018	10.1016/j.scitotenv.2018.05.109	yes			NCBI/ENA/DDBJ	https://www.ncbi.nlm.nih.gov/sra/?term=SRP080776
1289	BMC GENOMICS	2018	10.1186/s12864-018-5094-y	yes			NCBI/ENA/DDBJ	https://www.ncbi.nlm.nih.gov/bioproject/PRJEB23460
1294	PROCEEDINGS OF THE NATIONAL ACADEMY OF SCIENCES OF THE UNITED STATES OF AMERICA	2018	10.1073/pnas.1810229115	yes			NCBI/ENA/DDBJ	https://www.ncbi.nlm.nih.gov/geo/query/acc.cgi?acc=GSE108995
1298	NATURE COMMUNICATIONS	2018	10.1038/s41467-018-06393-w	yes			NCBI/ENA/DDBJ	https://www.ncbi.nlm.nih.gov/sra/SRX2939882[accn]
1301	BIOTECHNOLOGY FOR BIOFUELS	2018	10.1186/s13068-018-1258-x	yes			NCBI/ENA/DDBJ	https://www.ncbi.nlm.nih.gov/bioproject/PRJEB27149
1302	INTERNATIONAL JOURNAL OF FOOD MICROBIOLOGY	2018	10.1016/j.ijfoodmicro.2018.05.017	yes			NCBI/ENA/DDBJ	https://www.ncbi.nlm.nih.gov/bioproject/PRJEB23938
1306	ENVIRONMENTAL SCIENCE & TECHNOLOGY	2018	10.1021/acs.est.8b03446	yes			NCBI/ENA/DDBJ	https://www.ncbi.nlm.nih.gov/bioproject/PRJNA432264
1307	ENVIRONMENTAL SCIENCE & TECHNOLOGY	2018	10.1021/acs.est.8b02314	yes			NCBI/ENA/DDBJ	https://www.ncbi.nlm.nih.gov/bioproject/PRJNA422971
1318	WATER RESEARCH	2018	10.1016/j.watres.2018.05.033	yes			NCBI/ENA/DDBJ	https://www.ncbi.nlm.nih.gov/sra/SRP096812
1326	BMC MICROBIOLOGY	2018	10.1186/s12866-018-1257-x	yes			NCBI/ENA/DDBJ	https://www.ncbi.nlm.nih.gov/sra/ERX1782037[accn]
1337	FRONTIERS IN MICROBIOLOGY	2018	10.3389/fmicb.2018.02129	yes			NCBI/ENA/DDBJ	https://www.ncbi.nlm.nih.gov/search/all/?term=PRJNA472445
1339	GIGASCIENCE	2018	10.1093/gigascience/giy107	yes			NCBI/ENA/DDBJ	https://www.ncbi.nlm.nih.gov/bioproject/PRJEB24147
1341	BIOTECHNOLOGY FOR BIOFUELS	2018	10.1186/s13068-018-1238-1	yes			NCBI/ENA/DDBJ	https://www.ncbi.nlm.nih.gov/sra/SRX3042195[accn]
1349	SCIENTIFIC DATA	2018	10.1038/sdata.2018.154	yes			NCBI/ENA/DDBJ	https://www.ncbi.nlm.nih.gov/bioproject/PRJNA445865
1350	SCIENTIFIC DATA	2018	10.1038/sdata.2018.176	yes			NCBI/ENA/DDBJ	https://www.ncbi.nlm.nih.gov/sra/SRX3595722[accn]
1361	MSPHERE	2018	10.1128/mSphere.00346-18	yes			NCBI/ENA/DDBJ	https://www.ncbi.nlm.nih.gov/sra/SRX4201648
1364	MSPHERE	2018	10.1128/mSphere.00441-18	yes			NCBI/ENA/DDBJ	https://www.ncbi.nlm.nih.gov/sra/SRP133760
1370	MSYSTEMS	2018	10.1128/mSystems.00076-18	yes			NCBI/ENA/DDBJ	https://www.ncbi.nlm.nih.gov/bioproject/PRJNA445426
1371	MSYSTEMS	2018	10.1128/mSystems.00113-18	yes			NCBI/ENA/DDBJ	https://www.ncbi.nlm.nih.gov/sra/SRX3874118[accn]
1374	VIRUSES-BASEL	2018	10.3390/v10090496	yes			NCBI/ENA/DDBJ	https://www.ncbi.nlm.nih.gov/sra/DRA006230
1376	GENES	2018	10.3390/genes9090436	yes			NCBI/ENA/DDBJ	https://www.ncbi.nlm.nih.gov/search/all/?term=SRP113695
1410	SYSTEMATIC AND APPLIED MICROBIOLOGY	2018	10.1016/j.syapm.2018.05.004	yes			NCBI/ENA/DDBJ	https://www.ncbi.nlm.nih.gov/bioproject/PRJNA415696
1423	APPLIED MICROBIOLOGY AND BIOTECHNOLOGY	2018	10.1007/s00253-018-9201-4	yes			NCBI/ENA/DDBJ	https://www.ncbi.nlm.nih.gov/bioproject/PRJNA419544
1424	ARCHIVES OF VIROLOGY	2018	10.1007/s00705-018-3875-x	yes			NCBI/ENA/DDBJ	https://www.ncbi.nlm.nih.gov/nuccore/MF782663.1/
1427	NATURE MICROBIOLOGY	2018	10.1038/s41564-018-0210-y	yes			NCBI/ENA/DDBJ	https://www.ebi.ac.uk/ena/data/view/PRJEB22710
1428	APPLIED AND ENVIRONMENTAL MICROBIOLOGY	2018	10.1128/AEM.01244-18	yes			NCBI/ENA/DDBJ	https://www.ncbi.nlm.nih.gov/sra/SRP074882
1429	APPLIED AND ENVIRONMENTAL MICROBIOLOGY	2018	10.1128/AEM.01370-18	yes			NCBI/ENA/DDBJ	https://www.ncbi.nlm.nih.gov/bioproject/PRJNA429181
1431	FEMS MICROBIOLOGY ECOLOGY	2018	10.1093/femsec/fiy24	yes			NCBI/ENA/DDBJ	https://www.ncbi.nlm.nih.gov/sra/SRX2334036
1433	FEMS MICROBIOLOGY ECOLOGY	2018	10.1093/femsec/fiy133	yes			NCBI/ENA/DDBJ	https://trace.ncbi.nlm.nih.gov/Traces/sra/?study=SRP135559
1437	JOURNAL OF CLINICAL MICROBIOLOGY	2018	10.1128/JCM.00402-18	yes			NCBI/ENA/DDBJ	https://www.ncbi.nlm.nih.gov/bioproject/PRJNA436717
1447	EXTREMOPHILES	2018	10.1007/s00792-018-1030-y	yes			NCBI/ENA/DDBJ	https://www.ncbi.nlm.nih.gov/bioproject/PRJNA306428
1451	MOLECULAR ECOLOGY RESOURCES	2018	10.1111/1755-0998.12888	yes			NCBI/ENA/DDBJ	https://www.ncbi.nlm.nih.gov/sra/ERX2550281
1475	SCIENTIFIC REPORTS	2018	10.1038/s41598-018-30932-6	yes			NCBI/ENA/DDBJ	https://www.ncbi.nlm.nih.gov/sra/SRP136308
1476	PLOS ONE	2018	10.1371/journal.pone.0202527	yes			NCBI/ENA/DDBJ	https://www.ncbi.nlm.nih.gov/bioproject/PRJNA476368
1480	BMC GENOMICS	2018	10.1186/s12864-018-5019-9	yes			NCBI/ENA/DDBJ	https://www.ncbi.nlm.nih.gov/nuccore/CP026923
1493	GIGASCIENCE	2018	10.1093/gigascience/giy100	yes			NCBI/ENA/DDBJ	https://www.ncbi.nlm.nih.gov/sra/ERX2193242[accn]
1510	JOURNAL OF BIOTECHNOLOGY	2018	10.1016/j.jbiotec.2018.05.003	yes			NCBI/ENA/DDBJ	https://www.ncbi.nlm.nih.gov/nuccore/KY419227.1/
1511	GIGASCIENCE	2018	10.1093/gigascience/giy101	yes			NCBI/ENA/DDBJ	https://www.ncbi.nlm.nih.gov/search/all/?term=SRR6425828
1513	PLOS ONE	2018	10.1371/journal.pone.0202127	yes			NCBI/ENA/DDBJ	https://www.ncbi.nlm.nih.gov/sra/SRX3516443[accn]
1514	NATURE	2018	10.1038/s41586-018-0386-6	yes			NCBI/ENA/DDBJ	https://www.ncbi.nlm.nih.gov/sra/PRJEB24121
1527	FRONTIERS IN MICROBIOLOGY	2018	10.3389/fmicb.2018.01687	yes			NCBI/ENA/DDBJ	https://www.ncbi.nlm.nih.gov/search/all/?term=KY971642
1529	NATURE	2018	10.1038/s41586-018-0338-1	yes			NCBI/ENA/DDBJ	https://www.ncbi.nlm.nih.gov/sra/SRX4072504[accn]
1533	INFECTION GENETICS AND EVOLUTION	2018	10.1016/j.meegid.2018.04.034	yes			NCBI/ENA/DDBJ	https://www.ncbi.nlm.nih.gov/nuccore/MF766258.1/
1568	NATURE MICROBIOLOGY	2018	10.1038/s41564-018-0190-y	yes			NCBI/ENA/DDBJ	https://www.ncbi.nlm.nih.gov/bioproject/PRJNA386568/
1569	NATURE MICROBIOLOGY	2018	10.1038/s41564-018-0192-9	yes			NCBI/ENA/DDBJ	https://www.ebi.ac.uk/ena/data/view/PRJEB22062
1580	ISME JOURNAL	2018	10.1038/s41396-018-0109-x	yes			NCBI/ENA/DDBJ	https://www.ncbi.nlm.nih.gov/sra/?term=SAMN06544930
1582	ISME JOURNAL	2018	10.1038/s41396-018-0145-6	yes			NCBI/ENA/DDBJ	https://www.ncbi.nlm.nih.gov/geo/query/acc.cgi?acc=GSE113134
1586	FEMS MICROBIOLOGY ECOLOGY	2018	10.1093/femsec/fiy109	yes			NCBI/ENA/DDBJ	https://www.ncbi.nlm.nih.gov/nuccore/MCHG00000000.1/
1599	VIROLOGY	2018	10.1016/j.virol.2018.05.027	yes			NCBI/ENA/DDBJ	https://www.ncbi.nlm.nih.gov/sra/?term=SRP126473
1610	APPLIED AND ENVIRONMENTAL MICROBIOLOGY	2018	10.1128/AEM.00660-18	yes			NCBI/ENA/DDBJ	https://www.ncbi.nlm.nih.gov/nuccore/MF795056
1640	SCIENCE OF THE TOTAL ENVIRONMENT	2018	10.1016/j.scitotenv.2018.03.106	yes			NCBI/ENA/DDBJ	https://www.ncbi.nlm.nih.gov/sra/?term=SRP105345
1643	FOOD MICROBIOLOGY	2018	10.1016/j.fm.2018.02.011	yes			NCBI/ENA/DDBJ	https://www.ncbi.nlm.nih.gov/bioproject/PRJNA392985
1644	PEERJ	2018	10.7717/peerj.5355	yes			NCBI/ENA/DDBJ	https://www.ebi.ac.uk/ena/data/view/ERX2428141
1649	SCIENTIFIC DATA	2018	10.1038/sdata.2018.146	yes			NCBI/ENA/DDBJ	https://www.ebi.ac.uk/ena/data/view/PRJEB22997
1651	FRONTIERS IN MICROBIOLOGY	2018	10.3389/fmicb.2018.01715	yes			NCBI/ENA/DDBJ	https://www.ncbi.nlm.nih.gov/bioproject/PRJNA309291
1653	GENE	2018	10.1016/j.gene.2018.04.071	yes			NCBI/ENA/DDBJ	https://www.ncbi.nlm.nih.gov/sra/DRX084578[accn]
1654	GENE	2018	10.1016/j.gene.2018.04.073	yes			NCBI/ENA/DDBJ	https://ddbj.nig.ac.jp/DRASearch/query?keyword=DRA005744&show=20
1655	GENE	2018	10.1016/j.gene.2018.04.072	yes			NCBI/ENA/DDBJ	https://ddbj.nig.ac.jp/DRASearch/submission?acc=DRA005744
1656	GENE	2018	10.1016/j.gene.2018.04.074	yes			NCBI/ENA/DDBJ	https://www.ncbi.nlm.nih.gov/sra/DRA005744
1657	GENE	2018	10.1016/j.gene.2018.04.075	yes			NCBI/ENA/DDBJ	https://www.ncbi.nlm.nih.gov/sra/DRX084578[accn]
1665	SCIENTIFIC REPORTS	2018	10.1038/s41598-018-29571-8	yes			NCBI/ENA/DDBJ	https://www.ncbi.nlm.nih.gov/sra/SRX3868130[accn]
1674	GIGASCIENCE	2018	10.1093/gigascience/giy075	yes			NCBI/ENA/DDBJ	https://www.ncbi.nlm.nih.gov/bioproject/PRJEB25185
1681	CHEMICAL ENGINEERING JOURNAL	2018	10.1016/j.cej.2018.03.047	yes			NCBI/ENA/DDBJ	https://www.ncbi.nlm.nih.gov/bioproject/416028
1686	PROCEEDINGS OF THE NATIONAL ACADEMY OF SCIENCES OF THE UNITED STATES OF AMERICA	2018	10.1073/pnas.1800155115	yes			NCBI/ENA/DDBJ	https://www.ncbi.nlm.nih.gov/bioproject/PRJNA308326
1698	3 BIOTECH	2018	10.1007/s13205-018-1317-9	yes			NCBI/ENA/DDBJ	https://www.ncbi.nlm.nih.gov/bioproject/PRJNA348170/
1702	MICROBIOME	2018	10.1186/s40168-018-0499-z	yes			NCBI/ENA/DDBJ	https://www.ncbi.nlm.nih.gov/nuccore/CP025011.1
1710	FRONTIERS IN MICROBIOLOGY	2018	10.3389/fmicb.2018.01451	yes			NCBI/ENA/DDBJ	https://www.ncbi.nlm.nih.gov/sra/SRP111623
1719	VIRUSES-BASEL	2018	10.3390/v10070382	yes			NCBI/ENA/DDBJ	https://www.ncbi.nlm.nih.gov/sra/?term=SAMN08969257
1721	VIRUSES-BASEL	2018	10.3390/v10070388	yes			NCBI/ENA/DDBJ	https://www.ncbi.nlm.nih.gov/sra/?term=PRJNA477560
1726	MBIO	2018	10.1128/mBio.00898-18	yes			NCBI/ENA/DDBJ	https://www.ncbi.nlm.nih.gov/bioproject/PRJNA338014
1727	MBIO	2018	10.1128/mBio.01186-18	yes			NCBI/ENA/DDBJ	https://www.ncbi.nlm.nih.gov/bioproject/PRJNA461265
1729	MBIO	2018	10.1128/mBio.00916-18	yes			NCBI/ENA/DDBJ	https://www.ncbi.nlm.nih.gov/sra/SRX1837114[accn]
1738	MSYSTEMS	2018	10.1128/mSystems.00080-18	yes			NCBI/ENA/DDBJ	https://www.ncbi.nlm.nih.gov/sra/?term=SRR7083204
1743	MSPHERE	2018	10.1128/mSphere.00194-18	yes			NCBI/ENA/DDBJ	https://www.ncbi.nlm.nih.gov/sra/SRX3579938[accn]
1752	FEMS MICROBIOLOGY ECOLOGY	2018	10.1093/femsec/fiy089	yes			NCBI/ENA/DDBJ	https://www.ncbi.nlm.nih.gov/sra/SRX2342160
1754	FEMS MICROBIOLOGY ECOLOGY	2018	10.1093/femsec/fiy084	yes			NCBI/ENA/DDBJ	https://www.ebi.ac.uk/ena/data/view/PRJEB20124
1760	APPLIED AND ENVIRONMENTAL MICROBIOLOGY	2018	10.1128/AEM.00287-18	yes			NCBI/ENA/DDBJ	https://www.ncbi.nlm.nih.gov/sra/?term=SRR6423776
1771	MICROBIAL ECOLOGY	2018	10.1007/s00248-017-1120-x	yes			NCBI/ENA/DDBJ	https://www.ncbi.nlm.nih.gov/sra/ERX2159958[accn]
1775	APPLIED AND ENVIRONMENTAL MICROBIOLOGY	2018	10.1128/AEM.00610-18	yes			NCBI/ENA/DDBJ	https://www.ncbi.nlm.nih.gov/bioproject/PRJNA419351
1788	VIROLOGY	2018	10.1016/j.virol.2018.04.006	yes			NCBI/ENA/DDBJ	https://www.ncbi.nlm.nih.gov/bioproject/PRJNA471187
1792	MOLECULAR ECOLOGY	2018	10.1111/mec.14728	yes			NCBI/ENA/DDBJ	https://www.ncbi.nlm.nih.gov/sra/SRX3554615[accn]
1804	ARCHIVES OF VIROLOGY	2018	10.1007/s00705-018-3820-z	yes			NCBI/ENA/DDBJ	https://www.ncbi.nlm.nih.gov/nuccore/KF193403.1/
1805	ENVIRONMENTAL POLLUTION	2018	10.1016/j.envpol.2018.02.023	yes			NCBI/ENA/DDBJ	https://www.ncbi.nlm.nih.gov/sra/SRP090075
1815	INTERNATIONAL JOURNAL OF BIOLOGICAL MACROMOLECULES	2018	10.1016/j.ijbiomac.2018.02.100	yes			NCBI/ENA/DDBJ	https://www.ncbi.nlm.nih.gov/nuccore/MF460510.1/
1820	BIORESOURCE TECHNOLOGY	2018	10.1016/j.biortech.2018.03.025	yes			NCBI/ENA/DDBJ	https://www.ncbi.nlm.nih.gov/sra/SRS543595
1822	CHEMICAL ENGINEERING JOURNAL	2018	10.1016/j.cej.2018.02.112	yes			NCBI/ENA/DDBJ	https://www.ncbi.nlm.nih.gov/sra/SRX2924420[accn]
1829	NATURE	2018	10.1038/s41586-018-0225-9	yes			NCBI/ENA/DDBJ	https://www.ncbi.nlm.nih.gov/sra/?term=ERR598962
1839	FRONTIERS IN MICROBIOLOGY	2018	10.3389/fmicb.2013.01359	yes			NCBI/ENA/DDBJ	https://www.ncbi.nlm.nih.gov/sra/SRX3553203[accn]
1847	NATURE	2018	10.1038/s41586-018-0207-y	yes			NCBI/ENA/DDBJ	https://www.ncbi.nlm.nih.gov/bioproject/PRJNA449266
1853	BIOTECHNOLOGY FOR BIOFUELS	2018	10.1186/s13068-018-1162-4	yes			NCBI/ENA/DDBJ	https://www.ncbi.nlm.nih.gov/bioproject/PRJEB21266
1862	WATER RESEARCH	2018	10.1016/j.watres.2018.03.017	yes			NCBI/ENA/DDBJ	https://www.ncbi.nlm.nih.gov/bioproject/PRJNA396546
1875	SCIENTIFIC REPORTS	2018	10.1038/s41598-018-27168-9	yes			NCBI/ENA/DDBJ	https://www.ncbi.nlm.nih.gov/bioproject/PRJNA421932
1880	FRONTIERS IN MARINE SCIENCE	2018	10.3389/fmars.2018.00196	yes			NCBI/ENA/DDBJ	https://www.ncbi.nlm.nih.gov/bioproject/PRJNA382210
1910	FEMS MICROBIOLOGY ECOLOGY	2018	10.1093/femsec/fiy068	yes			NCBI/ENA/DDBJ	https://www.ncbi.nlm.nih.gov/nuccore/NAEP00000000.1/
1920	VIRUSES-BASEL	2018	10.3390/v10060318	yes			NCBI/ENA/DDBJ	https://www.ncbi.nlm.nih.gov/geo/query/acc.cgi?acc=GSE114251
1921	VIRUSES-BASEL	2018	10.3390/v10060331	yes			NCBI/ENA/DDBJ	https://www.ncbi.nlm.nih.gov/nuccore/KT372690.1/
1925	GENES	2018	10.3390/genes9060276	yes			NCBI/ENA/DDBJ	https://www.ncbi.nlm.nih.gov/search/all/?term=PRJNA352304
1943	JOURNAL OF MICROBIOLOGICAL METHODS	2018	10.1016/j.mimet.2018.02.016	yes			NCBI/ENA/DDBJ	https://www.ncbi.nlm.nih.gov/nuccore/KS790030
1955	ENVIRONMENTAL MICROBIOLOGY REPORTS	2018	10.1111/1758-2229.12634	yes			NCBI/ENA/DDBJ	https://www.ncbi.nlm.nih.gov/bioproject/PRJEB13142
1957	ENVIRONMENTAL MICROBIOLOGY REPORTS	2018	10.1111/1758-2229.12651	yes			NCBI/ENA/DDBJ	https://www.ncbi.nlm.nih.gov/sra/?term=SAMN06894543
1959	NATURE MICROBIOLOGY	2018	10.1038/s41564-018-0163-1	yes			NCBI/ENA/DDBJ	https://www.ncbi.nlm.nih.gov/bioproject/PRJNA362583
1967	ISME JOURNAL	2018	10.1038/s41396-018-0098-9	yes			NCBI/ENA/DDBJ	https://www.ncbi.nlm.nih.gov/bioproject/PRJNA400260
1971	VIRUS GENES	2018	10.1007/s11262-018-1557-0	yes			NCBI/ENA/DDBJ	https://www.ncbi.nlm.nih.gov/search/all/?term=KX884219
1974	CHEMOSPHERE	2018	10.1016/j.chemosphere.2018.02.177	yes			NCBI/ENA/DDBJ	https://www.ncbi.nlm.nih.gov/sra/SRP096475
1983	SCIENTIFIC REPORTS	2018	10.1038/s41598-018-26311-w	yes			NCBI/ENA/DDBJ	https://www.ncbi.nlm.nih.gov/sra/?term=PRJNA360904
1985	PROCEEDINGS OF THE NATIONAL ACADEMY OF SCIENCES OF THE UNITED STATES OF AMERICA	2018	10.1073/pnas.1722335115	yes			NCBI/ENA/DDBJ	https://www.ncbi.nlm.nih.gov/bioproject/PRJNA435676
1986	FRONTIERS IN MARINE SCIENCE	2018	10.3389/fmars.2018.00171	yes			NCBI/ENA/DDBJ	https://www.ncbi.nlm.nih.gov/sra/SRP126211
1989	FRONTIERS IN MICROBIOLOGY	2018	10.3389/fmicb.2018.01095	yes			NCBI/ENA/DDBJ	https://www.ncbi.nlm.nih.gov/search/all/?term=PRJNA419191
1992	VIROLOGY JOURNAL	2018	10.1186/s12985-018-1001-z	yes			NCBI/ENA/DDBJ	https://www.ncbi.nlm.nih.gov/sra/SRX3687348[accn]
1998	VIROLOGY JOURNAL	2018	10.1186/s12985-018-0999-2	yes			NCBI/ENA/DDBJ	https://www.ncbi.nlm.nih.gov/bioproject/PRJNA42371
2013	PROCEEDINGS OF THE NATIONAL ACADEMY OF SCIENCES OF THE UNITED STATES OF AMERICA	2018	10.1073/pnas.1708371115	yes			NCBI/ENA/DDBJ	https://www.ncbi.nlm.nih.gov/sra/SRX3885465[accn]
2026	GIGASCIENCE	2018	10.1093/gigascience/giy055	yes			NCBI/ENA/DDBJ	https://www.ncbi.nlm.nih.gov/search/all/?term=PRJEB22973
2027	BIOTECHNOLOGY FOR BIOFUELS	2018	10.1186/s13068-018-1136-6	yes			NCBI/ENA/DDBJ	https://www.ncbi.nlm.nih.gov/sra/SRX1041850
2035	PEERJ	2018	10.7717/peerj.4694	yes			NCBI/ENA/DDBJ	https://www.ncbi.nlm.nih.gov/sra/SRX2775995[accn]
2039	NATURE	2018	10.1038/s41586-018-0059-5	yes			NCBI/ENA/DDBJ	https://www.ncbi.nlm.nih.gov/bioproject/PRJNA390581/
2044	INTERNATIONAL JOURNAL OF FOOD MICROBIOLOGY	2018	10.1016/j.ijfoodmicro.2018.02.012	yes			NCBI/ENA/DDBJ	https://www.ncbi.nlm.nih.gov/bioproject/PRJEB17621
2062	MSPHERE	2018	10.1128/mSphere.00261-18	yes			NCBI/ENA/DDBJ	https://www.ncbi.nlm.nih.gov/bioproject/PRJNA354635
2063	MSPHERE	2018	10.1128/mSphereDirect.00185-18	yes			NCBI/ENA/DDBJ	https://www.ncbi.nlm.nih.gov/nuccore/QAJH00000000
2064	MSPHERE	2018	10.1128/mSphere.00122-18	yes			NCBI/ENA/DDBJ	https://www.ncbi.nlm.nih.gov/sra/ERX718623
2066	SYSTEMATIC AND APPLIED MICROBIOLOGY	2018	10.1016/j.syapm.2018.01.002	yes			NCBI/ENA/DDBJ	https://www.ncbi.nlm.nih.gov/nuccore/MVOG00000000.1
2067	MSYSTEMS	2018	10.1128/mSystems.00202-17	yes			NCBI/ENA/DDBJ	https://www.ncbi.nlm.nih.gov/sra/?term=SRP132961
2068	MSYSTEMS	2018	10.1128/mSystems.00044-18	yes			NCBI/ENA/DDBJ	https://www.ebi.ac.uk/ena/data/view/PRJEB20054
2070	MSYSTEMS	2018	10.1128/mSystems.00195-17	yes			NCBI/ENA/DDBJ	https://www.ncbi.nlm.nih.gov/sra/?term=SRX3141910
2075	MSYSTEMS	2018	10.1128/mSystems.00136-17	yes			NCBI/ENA/DDBJ	https://www.ncbi.nlm.nih.gov/sra/?term=SRP051069
2096	MBIO	2018	10.1128/mBio.00185-18	yes			NCBI/ENA/DDBJ	https://www.ncbi.nlm.nih.gov/nuccore/MF946548
2133	APPLIED AND ENVIRONMENTAL MICROBIOLOGY	2018	10.1128/AEM.02166-17	yes			NCBI/ENA/DDBJ	https://www.ncbi.nlm.nih.gov/sra/?term=SRP133308
2141	APPLIED MICROBIOLOGY AND BIOTECHNOLOGY	2018	10.1007/s00253-018-8885-9	yes			NCBI/ENA/DDBJ	https://www.ncbi.nlm.nih.gov/sra/?term=SRP119835
2146	EXTREMOPHILES	2018	10.1007/s00792-018-1000-4	yes			NCBI/ENA/DDBJ	https://www.ncbi.nlm.nih.gov/search/all/?term=SRR5990693
2147	EXTREMOPHILES	2018	10.1007/s00792-018-1012-0	yes			NCBI/ENA/DDBJ	https://www.ncbi.nlm.nih.gov/sra/SRP065596
2163	SCIENTIFIC DATA	2018	10.1038/sdata.2018.68	yes			NCBI/ENA/DDBJ	https://www.ebi.ac.uk/ena/data/view/PRJEB17507
2165	BIOTECHNOLOGY FOR BIOFUELS	2018	10.1186/s13068-018-1121-0	yes			NCBI/ENA/DDBJ	https://www.ncbi.nlm.nih.gov/search/all/?term=PRJNA393770
2175	NATURE COMMUNICATIONS	2018	10.1038/s41467-018-03968-5	yes			NCBI/ENA/DDBJ	https://www.ncbi.nlm.nih.gov/sra/?term=ERR1045807
2186	SCIENTIFIC REPORTS	2018	10.1038/s41598-018-24043-5	yes			NCBI/ENA/DDBJ	https://www.ebi.ac.uk/ena/data/view/SRR5226958
2197	VIROLOGY JOURNAL	2018	10.1186/s12985-018-0976-9	yes			NCBI/ENA/DDBJ	https://www.ncbi.nlm.nih.gov/bioproject/PRJNA193663
2206	BMC MICROBIOLOGY	2018	10.1186/s12866-018-1169-9	yes			NCBI/ENA/DDBJ	https://www.ncbi.nlm.nih.gov/sra/?term=PRJNA317339
2208	FRONTIERS IN MICROBIOLOGY	2018	10.3389/fmicb.2018.00623	yes			NCBI/ENA/DDBJ	https://www.ncbi.nlm.nih.gov/sra/SRX3133081[accn]
2237	GENES	2018	10.3390/genes9040214	yes			NCBI/ENA/DDBJ	https://www.ncbi.nlm.nih.gov/sra/SRP136046
2246	MOLECULAR ECOLOGY	2018	10.1111/mec.14465	yes			NCBI/ENA/DDBJ	https://www.ncbi.nlm.nih.gov/bioproject/PRJNA379456
2285	ENVIRONMENTAL POLLUTION	2018	10.1016/j.envpol.2017.12.008	yes			NCBI/ENA/DDBJ	https://www.ncbi.nlm.nih.gov/sra/SRR5001264
2297	VIRUS GENES	2018	10.1007/s11262-018-1543-6	yes			NCBI/ENA/DDBJ	https://www.ncbi.nlm.nih.gov/nuccore/KY502835.1/
2298	ENVIRONMENTAL MICROBIOLOGY REPORTS	2018	10.1111/1758-2229.12612	yes			NCBI/ENA/DDBJ	https://www.ncbi.nlm.nih.gov/sra/SRP066410
2337	FRONTIERS IN MARINE SCIENCE	2018	10.3389/fmars.2018.00101	yes			NCBI/ENA/DDBJ	https://www.ncbi.nlm.nih.gov/sra/SRP133535
2354	BIOTECHNOLOGY FOR BIOFUELS	2018	10.1186/s13068-018-1073-4	yes			NCBI/ENA/DDBJ	https://www.ncbi.nlm.nih.gov/search/all/?term=PRJEB20169
2383	SCIENCE	2018	10.1126/science.aao5774	yes			NCBI/ENA/DDBJ	https://www.ebi.ac.uk/ena/data/view/PRJEB1455
2387	NATURE	2018	10.1038/nature25973	yes			NCBI/ENA/DDBJ	https://www.ncbi.nlm.nih.gov/bioproject/PRJEB11532
2388	FRONTIERS IN MARINE SCIENCE	2018	10.3389/fmars.2018.00077	yes			NCBI/ENA/DDBJ	https://www.ncbi.nlm.nih.gov/bioproject/417963
2400	GENES	2018	10.3390/genes9030152	yes			NCBI/ENA/DDBJ	https://www.ncbi.nlm.nih.gov/search/all/?term=PRJNA318875
2474	ENVIRONMENTAL POLLUTION	2018	10.1016/j.envpol.2017.11.031	yes			NCBI/ENA/DDBJ	https://www.ncbi.nlm.nih.gov/sra/SRP114734
2476	ENVIRONMENTAL POLLUTION	2018	10.1016/j.envpol.2017.12.001	yes			NCBI/ENA/DDBJ	https://www.ncbi.nlm.nih.gov/sra/SRX2607651[accn]
2566	FRONTIERS IN CELLULAR AND INFECTION MICROBIOLOGY	2018	10.3389/fcimb.2018.00025	yes			NCBI/ENA/DDBJ	https://www.ncbi.nlm.nih.gov/bioproject/PRJEB23207
2574	INTERNATIONAL JOURNAL OF FOOD MICROBIOLOGY	2018	10.1016/j.ijfoodmicro.2017.10.015	yes			NCBI/ENA/DDBJ	https://www.ncbi.nlm.nih.gov/bioproject/PRJEB20568
2590	MOLECULAR ECOLOGY	2018	10.1111/mec.14496	yes			NCBI/ENA/DDBJ	https://www.ncbi.nlm.nih.gov/sra/SRP081548
2597	GENES	2018	10.3390/genes9020100	yes			NCBI/ENA/DDBJ	https://www.ncbi.nlm.nih.gov/bioproject/PRJNA352798
2609	VIRUS GENES	2018	10.1007/s11262-017-1514-3	yes			NCBI/ENA/DDBJ	https://www.ncbi.nlm.nih.gov/nuccore/KY973643.1/
2610	VIRUS GENES	2018	10.1007/s11262-017-1520-5	yes			NCBI/ENA/DDBJ	https://www.ncbi.nlm.nih.gov/nuccore/MF173068
2662	JOURNAL OF CLINICAL MICROBIOLOGY	2018	10.1128/JCM.01374-17	yes			NCBI/ENA/DDBJ	https://www.ncbi.nlm.nih.gov/sra/SRX3008922[accn]
2682	CHEMICAL ENGINEERING JOURNAL	2018	10.1016/j.cej.2017.09.160	yes			NCBI/ENA/DDBJ	https://www.ncbi.nlm.nih.gov/bioproject/PRJNA388406
2712	PROCEEDINGS OF THE NATIONAL ACADEMY OF SCIENCES OF THE UNITED STATES OF AMERICA	2018	10.1073/pnas.1708779115	yes			NCBI/ENA/DDBJ	https://www.ncbi.nlm.nih.gov/sra/?term=SRP081826
2714	SCIENTIFIC DATA	2018	10.1038/sdata.2017.203	yes			NCBI/ENA/DDBJ	https://www.ncbi.nlm.nih.gov/bioproject/PRJNA391943
2727	VIROLOGY JOURNAL	2018	10.1186/s12985-018-0923-9	yes			NCBI/ENA/DDBJ	https://www.ncbi.nlm.nih.gov/nuccore/MG026727
2733	FRONTIERS IN MARINE SCIENCE	2018	10.3389/fmars.2017.00441	yes			NCBI/ENA/DDBJ	https://www.ncbi.nlm.nih.gov/sra/?term=SRX3446201
2747	SCIENCE	2018	10.1126/science.aan3706	yes			NCBI/ENA/DDBJ	https://www.ncbi.nlm.nih.gov/bioproject/PRJEB22863
2748	SCIENCE	2018	10.1126/science.aan4236	yes			NCBI/ENA/DDBJ	https://www.ncbi.nlm.nih.gov/bioproject/PRJEB22894
2749	SCIENCE	2018	10.1126/science.aao3290	yes			NCBI/ENA/DDBJ	https://www.ncbi.nlm.nih.gov/sra/SRX3270815[accn]
2763	NATURE COMMUNICATIONS	2018	10.1038/s41467-017-02356-9	yes			NCBI/ENA/DDBJ	https://www.ncbi.nlm.nih.gov/sra?linkname=bioproject_sra_all&from_uid=395099
2765	PROCEEDINGS OF THE NATIONAL ACADEMY OF SCIENCES OF THE UNITED STATES OF AMERICA	2018	10.1073/pnas.1715549114	yes			NCBI/ENA/DDBJ	https://www.ncbi.nlm.nih.gov/sra/?term=SRP071909
2894	MSYSTEMS	2018	10.1128/mSystems.00214-17	yes			NCBI/ENA/DDBJ	https://www.ncbi.nlm.nih.gov/sra/SRP099838
2907	MOLECULAR ECOLOGY	2018	10.1111/mec.14435	yes			NCBI/ENA/DDBJ	https://www.ncbi.nlm.nih.gov/biosample/ERS1202862
2923	ENVIRONMENTAL SCIENCE AND POLLUTION RESEARCH	2018	10.1007/s11356-017-0535-8	yes			NCBI/ENA/DDBJ	https://www.ncbi.nlm.nih.gov/nuccore/LT605203
2933	NATURE MICROBIOLOGY	2018	10.1038/s41564-017-0052-z	yes			NCBI/ENA/DDBJ	https://www.ncbi.nlm.nih.gov/nuccore/MOXJ00000000.1/
2943	ENVIRONMENTAL MICROBIOLOGY	2018	10.1111/1462-2920.14015	yes			NCBI/ENA/DDBJ	https://www.ncbi.nlm.nih.gov/sra/SRX1990412[accn]
2953	ARCHIVES OF VIROLOGY	2018	10.1007/s00705-017-3570-3	yes			NCBI/ENA/DDBJ	https://www.ncbi.nlm.nih.gov/nuccore/KY321921.1/
2954	ARCHIVES OF VIROLOGY	2018	10.1007/s00705-017-3571-2	yes			NCBI/ENA/DDBJ	https://www.ncbi.nlm.nih.gov/nuccore/MF167307
2961	APPLIED MICROBIOLOGY AND BIOTECHNOLOGY	2018	10.1007/s00253-017-8609-6	yes			NCBI/ENA/DDBJ	https://www.ncbi.nlm.nih.gov/bioproject/PRJNA340941
2972	MICROBIAL ECOLOGY	2018	10.1007/s00248-017-1039-2	yes			NCBI/ENA/DDBJ	https://www.ncbi.nlm.nih.gov/bioproject/PRJNA350288
2973	MICROBIAL ECOLOGY	2018	10.1007/s00248-017-1028-5	yes			NCBI/ENA/DDBJ	https://www.ncbi.nlm.nih.gov/sra/ERP016557
2976	WATER RESEARCH	2018	10.1016/j.watres.2017.10.054	yes			NCBI/ENA/DDBJ	https://www.ncbi.nlm.nih.gov/sra/SRR5680088
2978	CHEMOSPHERE	2018	10.1016/j.chemosphere.2017.10.050	yes			NCBI/ENA/DDBJ	https://www.ebi.ac.uk/ena/data/view/PRJEB18995
2980	ISME JOURNAL	2018	10.1038/ismej.2017.187	yes			NCBI/ENA/DDBJ	https://www.ncbi.nlm.nih.gov/nuccore/NVUT01000003.1
2984	ISME JOURNAL	2018	10.1038/ismej.2017.155	yes			NCBI/ENA/DDBJ	https://www.ncbi.nlm.nih.gov/sra/?term=SAMN05933069
2989	APPLIED AND ENVIRONMENTAL MICROBIOLOGY	2018	10.1128/AEM.01965-17	yes			NCBI/ENA/DDBJ	https://www.ncbi.nlm.nih.gov/bioproject/PRJNA376231
2990	BIORESOURCE TECHNOLOGY	2018	10.1016/j.biortech.2017.08.214	yes			NCBI/ENA/DDBJ	https://www.ebi.ac.uk/ena/data/view/PRJEB21678
2995	INFECTION GENETICS AND EVOLUTION	2018	10.1016/j.meegid.2017.11.003	yes			NCBI/ENA/DDBJ	https://www.ncbi.nlm.nih.gov/nuccore/MF361269.1/
3002	ENVIRONMENTAL POLLUTION	2018	10.1016/j.envpol.2017.09.089	yes			NCBI/ENA/DDBJ	https://www.ncbi.nlm.nih.gov/sra/SRX3189262[accn]
3006	SCIENCE OF THE TOTAL ENVIRONMENT	2017	10.1016/j.scitotenv.2017.07.184	yes			NCBI/ENA/DDBJ	https://www.ncbi.nlm.nih.gov/sra/SRP105345
3018	GIGASCIENCE	2017	10.1093/gigascience/gix133	yes			NCBI/ENA/DDBJ	https://www.ebi.ac.uk/ena/data/view/PRJEB35961
3019	FRONTIERS IN MICROBIOLOGY	2017	10.3389/fmicb.2017.02619	yes			NCBI/ENA/DDBJ	https://www.ncbi.nlm.nih.gov/search/all/?term=PRJNA416849
3021	NATURE COMMUNICATIONS	2017	10.1038/s41467-017-02209-5	yes			NCBI/ENA/DDBJ	https://www.ncbi.nlm.nih.gov/sra/SRP002480
3026	NATURE	2017	10.1038/nature25014	yes			NCBI/ENA/DDBJ	https://www.ncbi.nlm.nih.gov/sra/?term=SRR5223441
3036	SCIENTIFIC REPORTS	2017	10.1038/s41598-017-17795-z	yes			NCBI/ENA/DDBJ	https://www.ncbi.nlm.nih.gov/bioproject/PRJNA321193
3045	GENE	2017	10.1016/j.gene.2017.09.021	yes			NCBI/ENA/DDBJ	https://www.ncbi.nlm.nih.gov/search/all/?term=SRP075638
3051	FRONTIERS IN MICROBIOLOGY	2017	10.3389/fmicb.2017.02499	yes			NCBI/ENA/DDBJ	https://www.ebi.ac.uk/ebisearch/search.ebi?db=genomes&query=ERR1103453%20
3054	BMC MICROBIOLOGY	2017	10.1186/s12866-017-1139-7	yes			NCBI/ENA/DDBJ	https://www.ebi.ac.uk/ena/data/view/PRJEB7369
3065	PLOS ONE	2017	10.1371/journal.pone.0188487	yes			NCBI/ENA/DDBJ	https://www.ebi.ac.uk/ena/data/view/PRJEB11853
3066	ENVIRONMENTAL SCIENCE & TECHNOLOGY	2017	10.1021/acs.est.7b01539	yes			NCBI/ENA/DDBJ	https://www.ncbi.nlm.nih.gov/bioproject/PRJNA326767
3094	GENES	2017	10.3390/genes8120350	yes			NCBI/ENA/DDBJ	https://www.ncbi.nlm.nih.gov/sra/SRX3013979[accn]
3096	FEMS MICROBIOLOGY ECOLOGY	2017	10.1093/femsec/fix151	yes			NCBI/ENA/DDBJ	https://www.ncbi.nlm.nih.gov/search/all/?term=PRJNA395380
3135	SCIENCE	2017	10.1126/science.aan5712	yes			NCBI/ENA/DDBJ	https://www.ncbi.nlm.nih.gov/sra/?term=SRP037334
3158	VIRUS GENES	2017	10.1007/s11262-017-1505-4	yes			NCBI/ENA/DDBJ	https://www.ncbi.nlm.nih.gov/search/all/?term=KU243129
3159	WATER RESEARCH	2017	10.1016/j.watres.2017.09.018	yes			NCBI/ENA/DDBJ	https://www.ncbi.nlm.nih.gov/bioproject/PRJEB20130
3174	SCIENCE OF THE TOTAL ENVIRONMENT	2017	10.1016/j.scitotenv.2017.05.256	yes			NCBI/ENA/DDBJ	https://www.ncbi.nlm.nih.gov/sra/?term=SRP100491
3182	NATURE COMMUNICATIONS	2017	10.1038/s41467-017-02018-w	yes			NCBI/ENA/DDBJ	https://www.ncbi.nlm.nih.gov/bioproject/PRJNA376580
3183	NATURE COMMUNICATIONS	2017	10.1038/s41467-017-01682-2	yes			NCBI/ENA/DDBJ	https://www.ncbi.nlm.nih.gov/sra/ERX1264351[accn]
3185	SCIENCE	2017	10.1126/science.aan8260	yes			NCBI/ENA/DDBJ	https://www.ebi.ac.uk/ena/data/view/DRR092712
3187	SCIENTIFIC REPORTS	2017	10.1038/s41598-017-16353-x	yes			NCBI/ENA/DDBJ	https://www.ncbi.nlm.nih.gov/sra/SRX3099379[accn]
3192	PEERJ	2017	10.7717/peerj.4084	yes			NCBI/ENA/DDBJ	https://www.ncbi.nlm.nih.gov/sra/SRR3656927
3194	PLOS ONE	2017	10.1371/journal.pone.0188327	yes			NCBI/ENA/DDBJ	https://www.ncbi.nlm.nih.gov/nuccore/KY799063.1/
3197	PEERJ	2017	10.7717/peerj.4054	yes			NCBI/ENA/DDBJ	https://www.ncbi.nlm.nih.gov/sra/SRX3358198[accn]
3201	NATURE COMMUNICATIONS	2017	10.1038/s41467-017-01753-4	yes			NCBI/ENA/DDBJ	https://www.ncbi.nlm.nih.gov/sra?linkname=bioproject_sra_all&from_uid=338276
3205	INTERNATIONAL JOURNAL OF FOOD MICROBIOLOGY	2017	10.1016/j.ijfoodmicro.2017.07.021	yes			NCBI/ENA/DDBJ	https://www.ncbi.nlm.nih.gov/bioproject/PRJNA377525
3209	SCIENTIFIC REPORTS	2017	10.1038/s41598-017-15154-6	yes			NCBI/ENA/DDBJ	https://www.ncbi.nlm.nih.gov/sra/?term=SRP124301
3215	WATER RESEARCH	2017	10.1016/j.watres.2017.08.060	yes			NCBI/ENA/DDBJ	https://www.ncbi.nlm.nih.gov/sra?LinkName=biosample_sra&from_uid=5277916
3216	CHEMICAL ENGINEERING JOURNAL	2017	10.1016/j.cej.2017.07.119	yes			NCBI/ENA/DDBJ	https://www.ncbi.nlm.nih.gov/sra/SRR5085997
3221	FRONTIERS IN MICROBIOLOGY	2017	10.3389/fmicb.2017.02235	yes			NCBI/ENA/DDBJ	https://www.ncbi.nlm.nih.gov/sra/SRX3052182[accn]
3224	BIOTECHNOLOGY FOR BIOFUELS	2017	10.1186/s13068-017-0947-1	yes			NCBI/ENA/DDBJ	https://www.ncbi.nlm.nih.gov/sra/?term=SRA357211
3233	PLOS ONE	2017	10.1371/Journal.pone.0186943	yes			NCBI/ENA/DDBJ	https://www.ncbi.nlm.nih.gov/nuccore/KX812440.1
3241	BMC GENOMICS	2017	10.1186/s12864-017-4229-x	yes			NCBI/ENA/DDBJ	https://www.ncbi.nlm.nih.gov/sra/ERX1620093[accn]
3244	NATURE	2017	10.1038/nature24287	yes			NCBI/ENA/DDBJ	https://www.ncbi.nlm.nih.gov/bioproject/PRJNA380528
3252	MBIO	2017	10.1128/mBio.01903-17	yes			NCBI/ENA/DDBJ	https://www.ncbi.nlm.nih.gov/sra/SRX2334711[accn]
3253	MSYSTEMS	2017	10.1128/mSystems.00046-17	yes			NCBI/ENA/DDBJ	https://www.ncbi.nlm.nih.gov/sra/SRX3289702[accn]
3254	MSYSTEMS	2017	10.1128/mSystems.00096-17	yes			NCBI/ENA/DDBJ	https://www.ncbi.nlm.nih.gov/sra/SRR5712450
3261	JOURNAL OF GENERAL VIROLOGY	2017	10.1099/jgv.0.000957	yes			NCBI/ENA/DDBJ	https://www.ncbi.nlm.nih.gov/nuccore/NC_023683.1/
3265	GENES	2017	10.3390/genes8110332	yes			NCBI/ENA/DDBJ	https://www.ebi.ac.uk/ena/data/view/PRJEB21168
3270	VIRUSES-BASEL	2017	10.3390/v9110328	yes			NCBI/ENA/DDBJ	https://www.ebi.ac.uk/ena/data/view/ERS1989512
3271	VIRUSES-BASEL	2017	10.3390/v9110348	yes			NCBI/ENA/DDBJ	https://www.ncbi.nlm.nih.gov/nuccore/MF098554.1/
3275	ENVIRONMENTAL MICROBIOLOGY	2017	10.1111/1462-2920.13879	yes			NCBI/ENA/DDBJ	https://www.ncbi.nlm.nih.gov/bioproject/PRJNA374409
3277	ENVIRONMENTAL MICROBIOLOGY	2017	10.1111/1462-2920.13934	yes			NCBI/ENA/DDBJ	https://www.ncbi.nlm.nih.gov/bioproject/PRJNA343173
3288	INFECTION GENETICS AND EVOLUTION	2017	10.1016/j.meegid.2017.09.026	yes			NCBI/ENA/DDBJ	https://www.ncbi.nlm.nih.gov/nuccore/KY768856.1/
3300	APPLIED AND ENVIRONMENTAL MICROBIOLOGY	2017	10.1128/AEM.01672-17	yes			NCBI/ENA/DDBJ	https://www.ncbi.nlm.nih.gov/sra/SRX5795139[accn]
3301	APPLIED AND ENVIRONMENTAL MICROBIOLOGY	2017	10.1128/AEM.01682-17	yes			NCBI/ENA/DDBJ	https://www.ncbi.nlm.nih.gov/bioproject/PRJNA356291
3305	APPLIED MICROBIOLOGY AND BIOTECHNOLOGY	2017	10.1007/s00253-017-8573-1	yes			NCBI/ENA/DDBJ	https://www.ncbi.nlm.nih.gov/sra/?term=SRR5630624
3307	ARCHIVES OF VIROLOGY	2017	10.1007/s00705-017-3481-3	yes			NCBI/ENA/DDBJ	https://www.ncbi.nlm.nih.gov/search/all/?term=KJ433989
3312	ENVIRONMENTAL POLLUTION	2017	10.1016/j.envpol.2017.07.059	yes			NCBI/ENA/DDBJ	https://www.ncbi.nlm.nih.gov/sra/SRR5092333
3317	ISME JOURNAL	2017	10.1038/ismej.2017.102	yes			NCBI/ENA/DDBJ	https://www.ncbi.nlm.nih.gov/bioproject/PRJNA305521
3320	ISME JOURNAL	2017	10.1038/ismej.2017.111	yes			NCBI/ENA/DDBJ	https://www.ncbi.nlm.nih.gov/nuccore/BBPD01000001
3349	VIROLOGY JOURNAL	2017	10.1186/s12985-017-0867-5	yes			NCBI/ENA/DDBJ	https://www.ncbi.nlm.nih.gov/search/all/?term=KY612371
3356	SCIENTIFIC DATA	2017	10.1038/sdata.2017.161	yes			NCBI/ENA/DDBJ	https://www.ncbi.nlm.nih.gov/sra/?term=SAMN05954283
3382	WATER RESEARCH	2017	10.1016/j.watres.2017.07.002	yes			NCBI/ENA/DDBJ	https://www.ncbi.nlm.nih.gov/sra/SRP064834
3383	CHEMICAL ENGINEERING JOURNAL	2017	10.1016/j.cej.2017.05.172	yes			NCBI/ENA/DDBJ	https://www.ncbi.nlm.nih.gov/sra/?term=SRX1676955
3391	FRONTIERS IN MICROBIOLOGY	2017	10.3389/fmicb.2017.01950	yes			NCBI/ENA/DDBJ	https://www.ncbi.nlm.nih.gov/nuccore/KY783477.1/
3395	NATURE COMMUNICATIONS	2017	10.1038/s41467-017-00900-1	yes			NCBI/ENA/DDBJ	https://www.ncbi.nlm.nih.gov/sra/ERX2077397[accn]
3408	VIROLOGY JOURNAL	2017	10.1186/s12985-017-0854-x	yes			NCBI/ENA/DDBJ	https://www.ncbi.nlm.nih.gov/bioproject/PRJNA394582
3426	NATURE MICROBIOLOGY	2017	10.1038/s41564-017-0002-9	yes			NCBI/ENA/DDBJ	https://www.ncbi.nlm.nih.gov/sra?LinkName=biosample_sra&from_uid=6618437
3435	APPLIED AND ENVIRONMENTAL MICROBIOLOGY	2017	10.1128/AEM.01295-17	yes			NCBI/ENA/DDBJ	https://www.ncbi.nlm.nih.gov/nuccore/MF043305
3436	APPLIED AND ENVIRONMENTAL MICROBIOLOGY	2017	10.1128/AEM.00888-17	yes			NCBI/ENA/DDBJ	https://www.ebi.ac.uk/ena/dataview/PRJEB17619
3457	MICROBIOLOGYOPEN	2017	10.1002/mbo3.502	yes			NCBI/ENA/DDBJ	https://www.ncbi.nlm.nih.gov/sra/?term=SRP029166
3460	MOLECULAR ECOLOGY	2017	10.1111/mec.14258	yes			NCBI/ENA/DDBJ	https://www.ncbi.nlm.nih.gov/nuccore/MF410754
3461	MOLECULAR ECOLOGY	2017	10.1111/mec.14144	yes			NCBI/ENA/DDBJ	https://www.ebi.ac.uk/ena/data/view/PRJEB18750
3481	ARCHIVES OF VIROLOGY	2017	10.1007/s00705-017-3443-9	yes			NCBI/ENA/DDBJ	https://www.ncbi.nlm.nih.gov/nuccore/KY705374.1/
3490	APPLIED MICROBIOLOGY AND BIOTECHNOLOGY	2017	10.1007/s00253-017-8464-5	yes			NCBI/ENA/DDBJ	https://www.ncbi.nlm.nih.gov/sra/?term=PRJNA376229
3496	INTERNATIONAL JOURNAL OF BIOLOGICAL MACROMOLECULES	2017	10.1016/j.ijbiomac.2017.05.113	yes			NCBI/ENA/DDBJ	https://www.ncbi.nlm.nih.gov/nuccore/KU352745
3497	CHEMOSPHERE	2017	10.1016/j.chemosphere.2017.05.163	yes			NCBI/ENA/DDBJ	https://www.ncbi.nlm.nih.gov/sra/?term=SRA308130
3499	WATER RESEARCH	2017	10.1016/j.watres.2017.06.005	yes			NCBI/ENA/DDBJ	https://www.ncbi.nlm.nih.gov/bioproject/PRJNA389521
3509	BMC MICROBIOLOGY	2017	10.1186/s12866-017-1111-6	yes			NCBI/ENA/DDBJ	https://www.ncbi.nlm.nih.gov/bioproject/PRJNA281298
3512	SCIENTIFIC REPORTS	2017	10.1038/s41598-017-12047-6	yes			NCBI/ENA/DDBJ	https://www.ncbi.nlm.nih.gov/sra/SRX2368795[accn]
3517	PLOS ONE	2017	10.1371/journal.pone.0185096	yes			NCBI/ENA/DDBJ	https://www.ncbi.nlm.nih.gov/sra/?term=SRR3150823
3527	PEERJ	2017	10.7717/peerj.3837	yes			NCBI/ENA/DDBJ	https://www.ncbi.nlm.nih.gov/sra/SRP100899
3530	INTERNATIONAL JOURNAL OF FOOD MICROBIOLOGY	2017	10.1016/j.ijfoodmicro.2017.06.001	yes			NCBI/ENA/DDBJ	https://www.ncbi.nlm.nih.gov/bioproject/PRJNA381682
3531	INTERNATIONAL JOURNAL OF FOOD MICROBIOLOGY	2017	10.1016/j.ijfoodmicro.2017.06.016	yes			NCBI/ENA/DDBJ	https://www.ncbi.nlm.nih.gov/bioproject/PRJNA288639
3539	PLOS ONE	2017	10.1371/journal.pone.0184718	yes			NCBI/ENA/DDBJ	https://www.ncbi.nlm.nih.gov/bioproject/PRJNA396214
3564	GIGASCIENCE	2017	10.1093/gigascience/gix089	yes			NCBI/ENA/DDBJ	https://www.ncbi.nlm.nih.gov/bioproject/PRJEB16061
3565	VIROLOGY JOURNAL	2017	10.1186/s12985-017-0839-9	yes			NCBI/ENA/DDBJ	https://www.ncbi.nlm.nih.gov/nuccore/KX891216.1/
3566	PROCEEDINGS OF THE NATIONAL ACADEMY OF SCIENCES OF THE UNITED STATES OF AMERICA	2017	10.1073/pnas.1707009114	yes			NCBI/ENA/DDBJ	https://www.ncbi.nlm.nih.gov/sra/SRX1270395[accn]
3567	PROCEEDINGS OF THE NATIONAL ACADEMY OF SCIENCES OF THE UNITED STATES OF AMERICA	2017	10.1073/pnas.1703070114	yes			NCBI/ENA/DDBJ	https://www.ncbi.nlm.nih.gov/sra/?term=SRP083815
3569	FRONTIERS IN MICROBIOLOGY	2017	10.3389/fmicb.2017.01623	yes			NCBI/ENA/DDBJ	https://www.ncbi.nlm.nih.gov/nuccore/NJIW00000000.1/
3583	MSPHERE	2017	10.1128/mSphere.00307-17	yes			NCBI/ENA/DDBJ	https://www.ncbi.nlm.nih.gov/sra/SRP102422
3585	MBIO	2017	10.1128/mBio.01017-17	yes			NCBI/ENA/DDBJ	https://www.ncbi.nlm.nih.gov/sra/?term=SAMN05791315
3587	MOLECULAR ECOLOGY RESOURCES	2017	10.1111/1755-0998.12679	yes			NCBI/ENA/DDBJ	https://www.ncbi.nlm.nih.gov/nuccore/AY359242
3589	MOLECULAR ECOLOGY RESOURCES	2017	10.1111/1755-0998.12644	yes			NCBI/ENA/DDBJ	https://www.ncbi.nlm.nih.gov/sra/SRR3049836
3600	MSYSTEMS	2017	10.1128/mSystems.00065-17	yes			NCBI/ENA/DDBJ	https://www.ncbi.nlm.nih.gov/bioproject/PRJNA301005/
3601	MSYSTEMS	2017	10.1128/mSystems.00038-17	yes			NCBI/ENA/DDBJ	https://www.ncbi.nlm.nih.gov/bioproject/PRJEB20591/
3602	MSYSTEMS	2017	10.1128/mSystems.00036-17	yes			NCBI/ENA/DDBJ	https://www.ncbi.nlm.nih.gov/sra/SRX3088073[accn]
3640	APPLIED MICROBIOLOGY AND BIOTECHNOLOGY	2017	10.1007/s00253-017-8430-2	yes			NCBI/ENA/DDBJ	https://www.ncbi.nlm.nih.gov/nuccore/KX644152.1/
3648	APPLIED AND ENVIRONMENTAL MICROBIOLOGY	2017	10.1128/AEM.00729-17	yes			NCBI/ENA/DDBJ	https://www.ncbi.nlm.nih.gov/sra/ERX1598178[accn]
3650	MOLECULAR ECOLOGY	2017	10.1111/mec.14214	yes			NCBI/ENA/DDBJ	https://www.ncbi.nlm.nih.gov/sra/ERX1858583[accn]
3666	VIROLOGY	2017	10.1016/j.virol.2017.06.019	yes			NCBI/ENA/DDBJ	https://www.ncbi.nlm.nih.gov/nuccore/KY212126
3667	INFECTION GENETICS AND EVOLUTION	2017	10.1016/j.meegid.2017.05.008	yes			NCBI/ENA/DDBJ	https://www.ncbi.nlm.nih.gov/sra/ERX1999096
3668	CHEMOSPHERE	2017	10.1016/j.chemosphere.2017.05.105	yes			NCBI/ENA/DDBJ	https://www.ncbi.nlm.nih.gov/sra/SRP092622
3669	CHEMOSPHERE	2017	10.1016/j.chemosphere.2017.05.144	yes			NCBI/ENA/DDBJ	https://www.ncbi.nlm.nih.gov/bioproject/PRJNA371500
3670	FOOD MICROBIOLOGY	2017	10.1016/j.fm.2017.05.002	yes			NCBI/ENA/DDBJ	https://www.ncbi.nlm.nih.gov/search/all/?term=SRX1838187
3676	SCIENTIFIC REPORTS	2017	10.1038/s41598-017-09906-7	yes			NCBI/ENA/DDBJ	https://www.ncbi.nlm.nih.gov/sra/SRR5807616
3700	MICROBIOME	2017	10.1186/s40168-017-0325-z	yes			NCBI/ENA/DDBJ	https://www.ncbi.nlm.nih.gov/sra/SRP098151
3718	MICROBIOME	2017	10.1186/s40168-017-0304-4	yes			NCBI/ENA/DDBJ	https://www.ncbi.nlm.nih.gov/bioproject/PRJNA324090
3764	ENVIRONMENTAL MICROBIOLOGY	2017	10.1111/1462-2920.13763	yes			NCBI/ENA/DDBJ	https://www.ebi.ac.uk/ena/data/view/PRJEB14783
3765	ENVIRONMENTAL MICROBIOLOGY	2017	10.1111/1462-2920.13788	yes			NCBI/ENA/DDBJ	https://www.ncbi.nlm.nih.gov/bioproject/PRJNA321235
3766	ENVIRONMENTAL MICROBIOLOGY	2017	10.1111/1462-2920.13800	yes			NCBI/ENA/DDBJ	https://www.ncbi.nlm.nih.gov/bioproject/PRJNA323575
3776	MICROBIOLOGYOPEN	2017	10.1002/mbo3.475	yes			NCBI/ENA/DDBJ	https://www.ncbi.nlm.nih.gov/bioproject/PRJEB20768
3777	MICROBIOLOGYOPEN	2017	10.1002/mbo3.482	yes			NCBI/ENA/DDBJ	https://www.ncbi.nlm.nih.gov/sra/SRP072490
3779	MICROBIOLOGYOPEN	2017	10.1002/mbo3.453	yes			NCBI/ENA/DDBJ	https://www.ebi.ac.uk/ena/data/view/ERX1296020
3784	APPLIED MICROBIOLOGY AND BIOTECHNOLOGY	2017	10.1007/s00253-017-8393-3	yes			NCBI/ENA/DDBJ	https://www.ncbi.nlm.nih.gov/nuccore/KF483136.1/
3789	APPLIED AND ENVIRONMENTAL MICROBIOLOGY	2017	10.1128/AEM.01144-17	yes			NCBI/ENA/DDBJ	https://www.ebi.ac.uk/ena/data/view/PRJEB20873
3790	ENVIRONMENTAL SCIENCE & TECHNOLOGY	2017	10.1021/acs.est.7b01866	yes			NCBI/ENA/DDBJ	https://www.ncbi.nlm.nih.gov/search/all/?term=SRP100137
3795	MOLECULAR ECOLOGY	2017	10.1111/mec.14194	yes			NCBI/ENA/DDBJ	https://www.ncbi.nlm.nih.gov/sra/SRP066059
3798	SCIENTIFIC DATA	2017	10.1038/sdata.2017.93	yes			NCBI/ENA/DDBJ	https://www.ebi.ac.uk/ena/data/view/PRJEB6609
3806	APPLIED MICROBIOLOGY AND BIOTECHNOLOGY	2017	10.1007/s00253-017-8343-0	yes			NCBI/ENA/DDBJ	https://www.ncbi.nlm.nih.gov/nuccore/KX176852
3815	ENVIRONMENTAL MICROBIOLOGY REPORTS	2017	10.1111/1758-2229.12544	yes			NCBI/ENA/DDBJ	https://www.ncbi.nlm.nih.gov/nuccore/MWJR00000000
3817	ISME JOURNAL	2017	10.1038/ismej.2017.46	yes			NCBI/ENA/DDBJ	https://www.ncbi.nlm.nih.gov/sra/SRP039390
3822	VIRUS GENES	2017	10.1007/s11262-017-1464-9	yes			NCBI/ENA/DDBJ	https://www.ncbi.nlm.nih.gov/nuccore/LC210599
3824	JOURNAL OF MICROBIOLOGICAL METHODS	2017	10.1016/j.mimet.2017.06.006	yes			NCBI/ENA/DDBJ	https://www.ncbi.nlm.nih.gov/sra/SRP090150
3825	MICROBIAL ECOLOGY	2017	10.1007/s00248-017-0953-7	yes			NCBI/ENA/DDBJ	https://www.ncbi.nlm.nih.gov/sra/SRX2417954[accn]
3831	GIGASCIENCE	2017	10.1093/gigascience/gix058	yes			NCBI/ENA/DDBJ	https://www.ncbi.nlm.nih.gov/sra/ERX2073350[accn]
3834	VIROLOGY JOURNAL	2017	10.1186/s12985-017-0810-9	yes			NCBI/ENA/DDBJ	https://www.ncbi.nlm.nih.gov/sra/?term=SRX3235902
3847	SCIENTIFIC DATA	2017	10.1038/sdata.2017.92	yes			NCBI/ENA/DDBJ	https://www.ebi.ac.uk/ena/data/view/PRJEB8420
3852	3 BIOTECH	2017	10.1007/s13205-017-0895-2	yes			NCBI/ENA/DDBJ	https://www.ncbi.nlm.nih.gov/nuccore/KU374969.1/
3856	PEERJ	2017	10.7717/peerj.3543	yes			NCBI/ENA/DDBJ	https://www.ebi.ac.uk/ena/data/view/PRJEB17696
3879	FRONTIERS IN CELLULAR AND INFECTION MICROBIOLOGY	2017	10.3389/fcimb.2017.00321	yes			NCBI/ENA/DDBJ	https://www.ncbi.nlm.nih.gov/sra/?term=SRP098954
3888	BMC BIOINFORMATICS	2017	10.1186/s12859-017-1738-1	yes			NCBI/ENA/DDBJ	https://www.ncbi.nlm.nih.gov/sra/SRX2235125[accn]
3893	PEERJ	2017	10.7717/peerj.3558	yes			NCBI/ENA/DDBJ	https://www.ncbi.nlm.nih.gov/bioproject/PRJNA385857
3898	FRONTIERS IN MICROBIOLOGY	2017	10.3389/fmicb.2017.01252	yes			NCBI/ENA/DDBJ	https://www.ncbi.nlm.nih.gov/sra/SRX2619647[accn]
3925	MBIO	2017	10.1128/mBio.00893-17	yes			NCBI/ENA/DDBJ	https://www.ncbi.nlm.nih.gov/bioproject/PRJNA384468
3926	MBIO	2017	10.1128/mBio.00709-17	yes			NCBI/ENA/DDBJ	https://www.ncbi.nlm.nih.gov/bioproject/PRJNA237795
3927	MBIO	2017	10.1128/mBio.00799-17	yes			NCBI/ENA/DDBJ	https://www.ncbi.nlm.nih.gov/sra/?term=ERS078132
3928	MBIO	2017	10.1128/mBio.00530-17	yes			NCBI/ENA/DDBJ	https://www.ncbi.nlm.nih.gov/bioproject/PRJNA326769
3930	MSPHERE	2017	10.1128/mSphere.00246-17	yes			NCBI/ENA/DDBJ	https://www.ncbi.nlm.nih.gov/sra/SRX1084489[accn]
3931	MSPHERE	2017	10.1128/mSphere.00300-17	yes			NCBI/ENA/DDBJ	https://www.ncbi.nlm.nih.gov/sra?linkname=bioproject_sra_all&from_uid=351238
3946	VIRUSES-BASEL	2017	10.3390/v9070177	yes			NCBI/ENA/DDBJ	https://www.ncbi.nlm.nih.gov/nuccore/LT900503.1
3973	APPLIED MICROBIOLOGY AND BIOTECHNOLOGY	2017	10.1007/s00253-017-8261-1	yes			NCBI/ENA/DDBJ	https://www.ncbi.nlm.nih.gov/bioproject/PRJNA354067
3976	ARCHIVES OF VIROLOGY	2017	10.1007/s00705-017-3314-4	yes			NCBI/ENA/DDBJ	https://www.ncbi.nlm.nih.gov/nuccore/KX951489.1/
3977	ARCHIVES OF VIROLOGY	2017	10.1007/s00705-017-3367-4	yes			NCBI/ENA/DDBJ	https://www.ncbi.nlm.nih.gov/sra/SRX2598264[accn]
3980	ARCHIVES OF VIROLOGY	2017	10.1007/s00705-017-3298-0	yes			NCBI/ENA/DDBJ	https://www.ncbi.nlm.nih.gov/nuccore/KT214389.1/
3981	ARCHIVES OF VIROLOGY	2017	10.1007/s00705-017-3343-z	yes			NCBI/ENA/DDBJ	https://www.ncbi.nlm.nih.gov/nuccore/KY548840.1/
3983	EXTREMOPHILES	2017	10.1007/s00792-017-0938-y	yes			NCBI/ENA/DDBJ	https://www.ncbi.nlm.nih.gov/sra/?term=SRR5453780
3989	JOURNAL OF APPLIED MICROBIOLOGY	2017	10.1111/jam.13432	yes			NCBI/ENA/DDBJ	https://www.ncbi.nlm.nih.gov/sra/SRP093227
4000	MICROBIAL ECOLOGY	2017	10.1007/s00248-017-0929-7	yes			NCBI/ENA/DDBJ	https://www.ncbi.nlm.nih.gov/sra/?term=SRX1894129
4019	SCIENTIFIC DATA	2017	10.1038/sdata.2017.81	yes			NCBI/ENA/DDBJ	https://www.ncbi.nlm.nih.gov/bioproject/PRJNA342805
4020	GIGASCIENCE	2017	10.1093/gigascience/gix050	yes			NCBI/ENA/DDBJ	https://www.ebi.ac.uk/ena/data/view/PRJEB15371
4022	NATURE COMMUNICATIONS	2017	10.1038/ncomms15892	yes			NCBI/ENA/DDBJ	https://www.ncbi.nlm.nih.gov/bioproject/PRJEB12379
4023	FRONTIERS IN MICROBIOLOGY	2017	10.3389/fmicb.2017.01134	yes			NCBI/ENA/DDBJ	https://www.ebi.ac.uk/ena/data/view/PRJEB19949
4027	BIOTECHNOLOGY FOR BIOFUELS	2017	10.1186/s13068-017-0840-y	yes			NCBI/ENA/DDBJ	https://www.ncbi.nlm.nih.gov/nuccore/MTKY00000000
4028	FRONTIERS IN MICROBIOLOGY	2017	10.3389/fmicb.2017.01151	yes			NCBI/ENA/DDBJ	https://www.ncbi.nlm.nih.gov/bioproject/PRJNA342151
4047	GIGASCIENCE	2017	10.1093/gigascience/gix044	yes			NCBI/ENA/DDBJ	https://www.ncbi.nlm.nih.gov/sra/SRP093814
4055	GIGASCIENCE	2017	10.1093/gigascience/gix040	yes			NCBI/ENA/DDBJ	https://www.ncbi.nlm.nih.gov/sra/SRX1485072[accn]
4056	BMC MICROBIOLOGY	2017	10.1186/s12866-017-1041-3	yes			NCBI/ENA/DDBJ	https://www.ncbi.nlm.nih.gov/sra/ERX1831854[accn]
4060	VIROLOGY JOURNAL	2017	10.1186/s12985-017-0773-x	yes			NCBI/ENA/DDBJ	https://www.ncbi.nlm.nih.gov/search/all/?term=KY006853
4063	SCIENTIFIC REPORTS	2017	10.1038/s41598-017-03139-4	yes			NCBI/ENA/DDBJ	https://www.ncbi.nlm.nih.gov/bioproject/PRJNA360039
4070	BIORESOURCE TECHNOLOGY	2017	10.1016/j.biortech.2017.03.043	yes			NCBI/ENA/DDBJ	https://www.ncbi.nlm.nih.gov/sra/SRX2369836[accn]
4075	JOURNAL OF GENERAL VIROLOGY	2017	10.1099/jgv.0.000799	yes			NCBI/ENA/DDBJ	https://www.ncbi.nlm.nih.gov/nuccore/KY498016
4082	MICROBIOLOGYOPEN	2017	10.1002/mbo3.446	yes			NCBI/ENA/DDBJ	https://www.ncbi.nlm.nih.gov/sra/?term=SAMN05509838
4084	JOURNAL OF CLINICAL MICROBIOLOGY	2017	10.1128/JCM.02402-16	yes			NCBI/ENA/DDBJ	https://www.ncbi.nlm.nih.gov/sra/?term=SAMN06604700
4099	ENVIRONMENTAL MICROBIOLOGY	2017	10.1111/1462-2920.13768	yes			NCBI/ENA/DDBJ	https://www.ncbi.nlm.nih.gov/bioproject/PRJNA341864
4111	APPLIED MICROBIOLOGY AND BIOTECHNOLOGY	2017	10.1007/s00253-017-8228-2	yes			NCBI/ENA/DDBJ	https://www.ncbi.nlm.nih.gov/nuccore/KX505389.1/
4117	MOLECULAR ECOLOGY	2017	10.1111/mec.14037	yes			NCBI/ENA/DDBJ	https://www.ncbi.nlm.nih.gov/sra/SRX2415115[accn]
4121	BIORESOURCE TECHNOLOGY	2017	10.1016/j.biortech.2017.03.051	yes			NCBI/ENA/DDBJ	https://www.ncbi.nlm.nih.gov/search/all/?term=SRP074867
4135	WATER RESEARCH	2017	10.1016/j.watres.2017.03.024	yes			NCBI/ENA/DDBJ	https://www.ncbi.nlm.nih.gov/sra/?term=PRJNA376213
4136	WATER RESEARCH	2017	10.1016/j.watres.2017.03.042	yes			NCBI/ENA/DDBJ	https://www.ebi.ac.uk/ena/data/view/PRJEB13176
4139	VIRUS GENES	2017	10.1007/s11262-017-1431-5	yes			NCBI/ENA/DDBJ	https://www.ncbi.nlm.nih.gov/nuccore/KR919804.1/
4140	VIRUS GENES	2017	10.1007/s11262-017-1440-4	yes			NCBI/ENA/DDBJ	https://www.ncbi.nlm.nih.gov/nuccore/KY026784
4146	INFECTION GENETICS AND EVOLUTION	2017	10.1016/j.meegid.2017.02.008	yes			NCBI/ENA/DDBJ	https://www.ncbi.nlm.nih.gov/nuccore/LC201585
4148	NATURE COMMUNICATIONS	2017	10.1038/ncomms15416	yes			NCBI/ENA/DDBJ	https://www.ncbi.nlm.nih.gov/sra/SRX2190714[accn]
4151	PLOS ONE	2017	10.1371/journal.pone.0177062	yes			NCBI/ENA/DDBJ	https://www.ncbi.nlm.nih.gov/bioproject/PRJEB9033
4179	MICROBIOME	2017	10.1186/s40168-017-0271-9	yes			NCBI/ENA/DDBJ	https://www.ncbi.nlm.nih.gov/sra/ERX1972773
4180	WATER RESEARCH	2017	10.1016/j.watres.2017.02.057	yes			NCBI/ENA/DDBJ	https://www.ncbi.nlm.nih.gov/bioproject/PRJNA335374
4182	SCIENCE OF THE TOTAL ENVIRONMENT	2017	10.1016/j.scitotenv.2017.02.120	yes			NCBI/ENA/DDBJ	https://www.ncbi.nlm.nih.gov/nuccore/JXWU00000000.1
4197	NUCLEIC ACIDS RESEARCH	2017	10.1093/nar/gkw1328	yes			NCBI/ENA/DDBJ	https://www.ncbi.nlm.nih.gov/bioproject/PRJEB14994
4200	BMC GENOMICS	2017	10.1186/s12864-017-3729-z	yes			NCBI/ENA/DDBJ	https://www.ncbi.nlm.nih.gov/nuccore/KU356689.1/
4204	BMC BIOINFORMATICS	2017	10.1186/s12859-017-1653-5	yes			NCBI/ENA/DDBJ	https://www.ncbi.nlm.nih.gov/bioproject/PRJNA303948
4211	MSPHERE	2017	10.1128/mSphere.00099-17	yes			NCBI/ENA/DDBJ	https://www.ncbi.nlm.nih.gov/bioproject/PRJNA384418
4215	MBIO	2017	10.1128/mBio.00561-17	yes			NCBI/ENA/DDBJ	https://www.ncbi.nlm.nih.gov/bioproject/PRJNA357090
4216	NATURE MICROBIOLOGY	2017	10.1038/nmicrobiol.2017.9	yes			NCBI/ENA/DDBJ	https://www.ncbi.nlm.nih.gov/nuccore/JXMT00000000
4241	MOLECULAR ECOLOGY	2017	10.1111/mec.14070	yes			NCBI/ENA/DDBJ	https://www.ncbi.nlm.nih.gov/sra/?term=PRJNA290145
4254	APPLIED MICROBIOLOGY AND BIOTECHNOLOGY	2017	10.1007/s00253-017-8152-5	yes			NCBI/ENA/DDBJ	https://www.ncbi.nlm.nih.gov/nuccore/KY076666
4258	EXTREMOPHILES	2017	10.1007/s00792-017-0932-4	yes			NCBI/ENA/DDBJ	https://www.ncbi.nlm.nih.gov/search/all/?term=PRJNA272672
4260	MICROBIOME	2017	10.1186/s40168-017-0260-z	yes			NCBI/ENA/DDBJ	https://www.ncbi.nlm.nih.gov/bioproject/PRJNA373876
4300	ENVIRONMENTAL SCIENCE & TECHNOLOGY	2017	10.1021/acs.est.6b05855	yes			NCBI/ENA/DDBJ	https://www.ncbi.nlm.nih.gov/bioproject/PRJNA343219
4301	PEERJ	2017	10.7717/peerj.3184	yes			NCBI/ENA/DDBJ	https://www.ncbi.nlm.nih.gov/sra?term=SRP071082
4310	BMC MICROBIOLOGY	2017	10.1186/s12866-017-1002-x	yes			NCBI/ENA/DDBJ	https://www.ncbi.nlm.nih.gov/bioproject/PRJNA335996
4315	MICROBIOME	2017	10.1186/s40168-017-0258-6	yes			NCBI/ENA/DDBJ	https://www.ncbi.nlm.nih.gov/sra/ERP011540
4316	SCIENCE	2017	10.1126/science.aal4657	yes			NCBI/ENA/DDBJ	https://www.ncbi.nlm.nih.gov/nuccore/KY684083.1/
4317	VIROLOGY JOURNAL	2017	10.1186/s12985-017-0741-5	yes			NCBI/ENA/DDBJ	https://www.ncbi.nlm.nih.gov/nuccore/KY171989
4343	VIRUSES-BASEL	2017	10.3390/v9040084	yes			NCBI/ENA/DDBJ	https://www.ncbi.nlm.nih.gov/bioproject/PRJNA262844
4349	JOURNAL OF GENERAL VIROLOGY	2017	10.1099/jgv.0.000711	yes			NCBI/ENA/DDBJ	https://www.ncbi.nlm.nih.gov/nuccore/KY053058
4364	SYSTEMATIC AND APPLIED MICROBIOLOGY	2017	10.1016/j.syapm.2016.12.001	yes			NCBI/ENA/DDBJ	https://www.ncbi.nlm.nih.gov/sra/?term=SRP065755
4365	SYSTEMATIC AND APPLIED MICROBIOLOGY	2017	10.1016/j.syapm.2017.02.003	yes			NCBI/ENA/DDBJ	https://www.ncbi.nlm.nih.gov/sra/?term=PRJNA291680
4378	APPLIED MICROBIOLOGY AND BIOTECHNOLOGY	2017	10.1007/s00253-016-8000-z	yes			NCBI/ENA/DDBJ	https://www.ncbi.nlm.nih.gov/sra/?term=PRJNA302816
4380	MICROBIOLOGYOPEN	2017	10.1002/mbo3.429	yes			NCBI/ENA/DDBJ	https://www.ncbi.nlm.nih.gov/sra/?term=SRP072790
4388	JOURNAL OF MICROBIOLOGICAL METHODS	2017	10.1016/j.mimet.2017.01.016	yes			NCBI/ENA/DDBJ	https://www.ncbi.nlm.nih.gov/sra/SRX1895788[accn]
4391	MICROBIAL ECOLOGY	2017	10.1007/s00248-016-0902-x	yes			NCBI/ENA/DDBJ	https://www.ncbi.nlm.nih.gov/search/all/?term=AE003852
4395	VIROLOGY	2017	10.1016/j.virol.2017.01.010	yes			NCBI/ENA/DDBJ	https://www.ncbi.nlm.nih.gov/sra/?term=PRJNA353874
4415	SCIENTIFIC DATA	2017	10.1038/sdata.2017.37	yes			NCBI/ENA/DDBJ	https://www.ncbi.nlm.nih.gov/bioproject/PRJNA269163
4421	BMC GENOMICS	2017	10.1186/s12864-017-3632-7	yes			NCBI/ENA/DDBJ	https://www.ncbi.nlm.nih.gov/sra?linkname=bioproject_sra_all&from_uid=344863
4428	PROCEEDINGS OF THE NATIONAL ACADEMY OF SCIENCES OF THE UNITED STATES OF AMERICA	2017	10.1073/pnas.1618556114	yes			NCBI/ENA/DDBJ	https://www.ncbi.nlm.nih.gov/search/all/?term=GCA_000211815.1
4434	WATER RESEARCH	2017	10.1016/j.watres.2017.01.011	yes			NCBI/ENA/DDBJ	https://www.ncbi.nlm.nih.gov/sra/?term=SRR1745247
4445	MICROBIOME	2017	10.1186/s40168-017-0251-0	yes			NCBI/ENA/DDBJ	https://www.ncbi.nlm.nih.gov/sra/SRR3545174
4446	PROCEEDINGS OF THE NATIONAL ACADEMY OF SCIENCES OF THE UNITED STATES OF AMERICA	2017	10.1073/pnas.1614190114	yes			NCBI/ENA/DDBJ	https://www.ncbi.nlm.nih.gov/bioproject/PRJNA308429
4448	MICROBIOME	2017	10.1186/s40168-017-0246-x	yes			NCBI/ENA/DDBJ	https://www.ncbi.nlm.nih.gov/sra/SRX2544211[accn]
4456	PLOS ONE	2017	10.1371/journal.pone.0172545	yes			NCBI/ENA/DDBJ	https://www.ncbi.nlm.nih.gov/nuccore/KF255992.1/
4457	ENVIRONMENTAL SCIENCE & TECHNOLOGY	2017	10.1021/acs.est.6b04477	yes			NCBI/ENA/DDBJ	https://www.ncbi.nlm.nih.gov/search/all/?term=SRP056932
4485	MSPHERE	2017	10.1128/mSphere.00359-16	yes			NCBI/ENA/DDBJ	https://www.ncbi.nlm.nih.gov/bioproject/PRJDB4437
4493	FEMS MICROBIOLOGY ECOLOGY	2017	10.1093/femsec/fix005	yes			NCBI/ENA/DDBJ	https://www.ncbi.nlm.nih.gov/nuccore/KX146440.1/
4509	ENVIRONMENTAL MICROBIOLOGY	2017	10.1111/1462-2920.13624	yes			NCBI/ENA/DDBJ	https://www.ncbi.nlm.nih.gov/bioproject/PRJEB6559
4510	ENVIRONMENTAL MICROBIOLOGY	2017	10.1111/1462-2920.13643	yes			NCBI/ENA/DDBJ	https://www.ncbi.nlm.nih.gov/sra/ERX1071610[accn]
4511	ENVIRONMENTAL MICROBIOLOGY	2017	10.1111/1462-2920.13646	yes			NCBI/ENA/DDBJ	https://www.ncbi.nlm.nih.gov/sra/?term=SRA278189
4512	EXTREMOPHILES	2017	10.1007/s00792-016-0900-4	yes			NCBI/ENA/DDBJ	https://www.ncbi.nlm.nih.gov/sra/?term=SRR1264487
4515	MOLECULAR ECOLOGY	2017	10.1111/mec.14003	yes			NCBI/ENA/DDBJ	https://www.ncbi.nlm.nih.gov/sra/SRP061923
4520	VIRUSES-BASEL	2017	10.3390/v9030047	yes			NCBI/ENA/DDBJ	https://www.ncbi.nlm.nih.gov/bioproject/PRJEB16346
4524	INFECTION GENETICS AND EVOLUTION	2017	10.1016/j.meegid.2016.12.002	yes			NCBI/ENA/DDBJ	https://www.ncbi.nlm.nih.gov/nuccore/KX756619.1/
4525	JOURNAL OF APPLIED MICROBIOLOGY	2017	10.1111/jam.13386	yes			NCBI/ENA/DDBJ	https://www.ncbi.nlm.nih.gov/search/all/?term=SRP062461
4537	WATER RESEARCH	2017	10.1016/j.watres.2016.11.056	yes			NCBI/ENA/DDBJ	https://www.ncbi.nlm.nih.gov/nuccore/KU604935
4538	WATER RESEARCH	2017	10.1016/j.watres.2016.12.020	yes			NCBI/ENA/DDBJ	https://www.ncbi.nlm.nih.gov/sra/?term=PRJEB18470
4551	INTERNATIONAL JOURNAL OF BIOLOGICAL MACROMOLECULES	2017	10.1016/j.ijbiomac.2016.12.061	yes			NCBI/ENA/DDBJ	https://www.ncbi.nlm.nih.gov/nuccore/NC_004567?report=genbank
4556	PROCEEDINGS OF THE NATIONAL ACADEMY OF SCIENCES OF THE UNITED STATES OF AMERICA	2017	10.1073/pnas.1614654114	yes			NCBI/ENA/DDBJ	https://www.ncbi.nlm.nih.gov/nuccore/KU221504
4560	GIGASCIENCE	2017	10.1093/gigascience/gix007	yes			NCBI/ENA/DDBJ	https://www.ncbi.nlm.nih.gov/sra/?term=4629367.3
4563	FRONTIERS IN CELLULAR AND INFECTION MICROBIOLOGY	2017	10.3389/fcimb.2017.00047	yes			NCBI/ENA/DDBJ	https://www.ncbi.nlm.nih.gov/sra/ERX1874395[accn]
4565	SCIENTIFIC REPORTS	2017	10.1038/srep42968	yes			NCBI/ENA/DDBJ	https://www.ncbi.nlm.nih.gov/nuccore/CP016540.2/
4570	SCIENCE OF THE TOTAL ENVIRONMENT	2017	10.1016/j.scitotenv.2016.11.186	yes			NCBI/ENA/DDBJ	https://www.ncbi.nlm.nih.gov/sra/SRR2140592
4585	NATURE	2017	10.1038/nature21059	yes			NCBI/ENA/DDBJ	https://www.ncbi.nlm.nih.gov/bioproject/PRJNA349044
4615	ENVIRONMENTAL MICROBIOLOGY	2017	10.1111/1462-2920.13362	yes			NCBI/ENA/DDBJ	https://www.ncbi.nlm.nih.gov/bioproject/PRJNA229517
4623	JOURNAL OF GENERAL VIROLOGY	2017	10.1099/jgv.0.000671	yes			NCBI/ENA/DDBJ	https://www.ncbi.nlm.nih.gov/nuccore/KX907333.1/
4631	ENVIRONMENTAL SCIENCE AND POLLUTION RESEARCH	2017	10.1007/s11356-016-8118-7	yes			NCBI/ENA/DDBJ	https://www.ncbi.nlm.nih.gov/nuccore/KR232658
4635	MICROBIOME	2017	10.1186/s40168-017-0232-3	yes			NCBI/ENA/DDBJ	https://www.ncbi.nlm.nih.gov/search/all/?term=SRA045646
4637	NATURE MICROBIOLOGY	2017	10.1038/nmicrobiol.2016.198	yes			NCBI/ENA/DDBJ	https://www.ncbi.nlm.nih.gov/sra?linkname=bioproject_sra_all&from_uid=342239
4649	JOURNAL OF CLINICAL MICROBIOLOGY	2017	10.1128/JCM.02121-16	yes			NCBI/ENA/DDBJ	https://www.ncbi.nlm.nih.gov/nuccore/KX162696.1/
4657	APPLIED AND ENVIRONMENTAL MICROBIOLOGY	2017	10.1128/AEM.02894-16	yes			NCBI/ENA/DDBJ	https://www.ncbi.nlm.nih.gov/nuccore/MLZK00000000
4679	SCIENTIFIC REPORTS	2017	10.1038/srep41498	yes			NCBI/ENA/DDBJ	https://www.ncbi.nlm.nih.gov/sra/?term=ERR1138643
4681	PEERJ	2017	10.7717/peerj.2945	yes			NCBI/ENA/DDBJ	https://www.ncbi.nlm.nih.gov/sra?term=SRP049438
4689	PLOS ONE	2017	10.1371/journal.pone.0170693	yes			NCBI/ENA/DDBJ	https://www.ncbi.nlm.nih.gov/bioproject/PRJNA360153
4703	MICROBIOME	2017	10.1186/s40168-016-0221-y	yes			NCBI/ENA/DDBJ	https://www.ncbi.nlm.nih.gov/sra/ERP012908
4704	BMC MICROBIOLOGY	2017	10.1186/s12866-016-0923-0	yes			NCBI/ENA/DDBJ	https://www.ncbi.nlm.nih.gov/nuccore/LC038188.1/
4710	INTERNATIONAL JOURNAL OF FOOD MICROBIOLOGY	2017	10.1016/j.ijfoodmicro.2016.10.024	yes			NCBI/ENA/DDBJ	https://www.ncbi.nlm.nih.gov/nuccore/KX455485.1/
4719	FRONTIERS IN CELLULAR AND INFECTION MICROBIOLOGY	2017	10.3389/fcimb.2016.00198	yes			NCBI/ENA/DDBJ	https://www.ncbi.nlm.nih.gov/search/all/?term=PRJNA354641
4741	NATURE MICROBIOLOGY	2017	10.1038/nmicrobiol.2016.180	yes			NCBI/ENA/DDBJ	https://www.ncbi.nlm.nih.gov/bioproject/289586
4798	MSYSTEMS	2017	10.1128/mSystems.00125-16	yes			NCBI/ENA/DDBJ	https://www.ncbi.nlm.nih.gov/bioproject/PRJNA320636
4799	MSYSTEMS	2017	10.1128/mSystems.00164-16	yes			NCBI/ENA/DDBJ	https://www.ncbi.nlm.nih.gov/sra/SRX2068381[accn]
4801	MSYSTEMS	2017	10.1128/mSystems.00124-16	yes			NCBI/ENA/DDBJ	https://www.ncbi.nlm.nih.gov/geo/query/acc.cgi?acc=GSE65189
4802	MSYSTEMS	2017	10.1128/mSystems.00169-16	yes			NCBI/ENA/DDBJ	https://www.ncbi.nlm.nih.gov/bioproject/PRJNA314988
4832	FEMS MICROBIOLOGY ECOLOGY	2017	10.1093/femsec/fiw224	yes			NCBI/ENA/DDBJ	https://www.ncbi.nlm.nih.gov/bioproject/PRJNA317990
4852	ISME JOURNAL	2017	10.1038/ismej.2016.87	yes			NCBI/ENA/DDBJ	https://www.ncbi.nlm.nih.gov/nuccore/CP010552.1/
4878	EXTREMOPHILES	2017	10.1007/s00792-016-0885-z	yes			NCBI/ENA/DDBJ	https://www.ncbi.nlm.nih.gov/nuccore/LT601555.1/
4879	EXTREMOPHILES	2017	10.1007/s00792-016-0889-8	yes			NCBI/ENA/DDBJ	https://www.ncbi.nlm.nih.gov/bioproject/PRJNA284196
4884	APPLIED AND ENVIRONMENTAL MICROBIOLOGY	2017	10.1128/AEM.02694-16	yes			NCBI/ENA/DDBJ	https://www.ncbi.nlm.nih.gov/sra/ERX1788121[accn]
4895	APPLIED MICROBIOLOGY AND BIOTECHNOLOGY	2017	10.1007/s00253-016-7846-4	yes			NCBI/ENA/DDBJ	https://www.ncbi.nlm.nih.gov/bioproject/PRJNA301917
4896	APPLIED MICROBIOLOGY AND BIOTECHNOLOGY	2017	10.1007/s00253-016-7934-5	yes			NCBI/ENA/DDBJ	https://www.ncbi.nlm.nih.gov/nuccore/KX244616.1/
4897	APPLIED MICROBIOLOGY AND BIOTECHNOLOGY	2017	10.1007/s00253-016-7945-2	yes			NCBI/ENA/DDBJ	https://www.ncbi.nlm.nih.gov/sra/?term=SRP058675
4902	JOURNAL OF CLINICAL MICROBIOLOGY	2017	10.1128/JCM.01881-16	yes			NCBI/ENA/DDBJ	https://www.ncbi.nlm.nih.gov/nuccore/KX574704
4905	MICROBIAL ECOLOGY	2017	10.1007/s00248-016-0834-5	yes			NCBI/ENA/DDBJ	https://www.ncbi.nlm.nih.gov/sra/SRX3090907[accn]
4914	APPLIED MICROBIOLOGY AND BIOTECHNOLOGY	2017	10.1007/s00253-016-7868-y	yes			NCBI/ENA/DDBJ	https://www.ncbi.nlm.nih.gov/sra/?term=SRA304191
4929	SCIENCE OF THE TOTAL ENVIRONMENT	2017	10.1016/j.scitotenv.2016.09.017	yes			NCBI/ENA/DDBJ	https://www.ncbi.nlm.nih.gov/sra/?term=SRA308130
4934	FRONTIERS IN MARINE SCIENCE	2017	10.3389/fmars.2017.00291	yes			NCBI/ENA/DDBJ	https://www.ncbi.nlm.nih.gov/nuccore/KC869461.1/
4935	FRONTIERS IN MARINE SCIENCE	2017	10.3389/fmars.2017.00023	yes			NCBI/ENA/DDBJ	https://www.ncbi.nlm.nih.gov/bioproject/PRJNA328797
4936	FRONTIERS IN MARINE SCIENCE	2017	10.3389/fmars.2017.00253	yes			NCBI/ENA/DDBJ	https://www.ncbi.nlm.nih.gov/sra/SRX2438288
4937	FRONTIERS IN MARINE SCIENCE	2017	10.3389/fmars.2017.00285	yes			NCBI/ENA/DDBJ	https://www.ncbi.nlm.nih.gov/search/all/?term=PRJNA393758
4938	FRONTIERS IN MARINE SCIENCE	2017	10.3389/fmars.2016.00283	yes			NCBI/ENA/DDBJ	https://www.ncbi.nlm.nih.gov/sra?LinkName=biosample_sra&from_uid=6173488
4952	SCIENTIFIC REPORTS	2016	10.1038/srep39491	yes			NCBI/ENA/DDBJ	https://www.ncbi.nlm.nih.gov/sra?linkname=bioproject_sra_all&from_uid=507062
4955	PROCEEDINGS OF THE NATIONAL ACADEMY OF SCIENCES OF THE UNITED STATES OF AMERICA	2016	10.1073/pnas.1615581113	yes			NCBI/ENA/DDBJ	https://www.ncbi.nlm.nih.gov/bioproject/PRJNA338196
4961	NATURE COMMUNICATIONS	2016	10.1038/ncomms13699	yes			NCBI/ENA/DDBJ	https://www.ncbi.nlm.nih.gov/sra/?term=PRJNA320968
4963	GENE	2016	10.1016/j.gene.2016.09.021	yes			NCBI/ENA/DDBJ	https://www.ncbi.nlm.nih.gov/bioproject/PRJNA321092
4977	PLOS ONE	2016	10.1371/journal.pone.0167870	yes			NCBI/ENA/DDBJ	https://www.ncbi.nlm.nih.gov/sra/?term=SRP083779
4984	INTERNATIONAL JOURNAL OF FOOD MICROBIOLOGY	2016	10.1016/j.ijfoodmicro.2016.09.030	yes			NCBI/ENA/DDBJ	https://www.ncbi.nlm.nih.gov/sra/DRA003983
4985	VIROLOGY JOURNAL	2016	10.1186/s12985-016-0656-6	yes			NCBI/ENA/DDBJ	https://www.ncbi.nlm.nih.gov/nuccore/KR072689.1/
4996	ISME JOURNAL	2016	10.1038/ismej.2016.74	yes			NCBI/ENA/DDBJ	https://www.ncbi.nlm.nih.gov/sra/SRX225604
5007	ENVIRONMENTAL MICROBIOLOGY	2016	10.1111/1462-2920.13388	yes			NCBI/ENA/DDBJ	https://www.ncbi.nlm.nih.gov/nuccore/KU729677
5024	MOLECULAR ECOLOGY	2016	10.1111/mec.13901	yes			NCBI/ENA/DDBJ	https://www.ncbi.nlm.nih.gov/nuccore/KX459698
5031	JOURNAL OF GENERAL VIROLOGY	2016	10.1099/jgv.0.000644	yes			NCBI/ENA/DDBJ	https://www.ncbi.nlm.nih.gov/sra/SRX2175723[accn]
5040	FEMS MICROBIOLOGY ECOLOGY	2016	10.1093/femsec/fiw184	yes			NCBI/ENA/DDBJ	https://www.ncbi.nlm.nih.gov/nuccore/KU760766
5050	PLOS ONE	2016	10.1371/journal.pone.0167422	yes			NCBI/ENA/DDBJ	https://www.ncbi.nlm.nih.gov/geo/query/acc.cgi?acc=GSE54055
5056	WATER RESEARCH	2016	10.1016/j.watres.2016.09.040	yes			NCBI/ENA/DDBJ	https://www.ncbi.nlm.nih.gov/sra/SRX1738749
5062	NATURE MICROBIOLOGY	2016	10.1038/NMICROBIOL.2016.203	yes			NCBI/ENA/DDBJ	https://www.ncbi.nlm.nih.gov/bioproject/PRJEB13171
5063	NATURE MICROBIOLOGY	2016	10.1038/NMICROBIOL.2016.161	yes			NCBI/ENA/DDBJ	https://www.ncbi.nlm.nih.gov/sra/ERX1214946[accn]
5074	VIRUS GENES	2016	10.1007/s11262-016-1380-4	yes			NCBI/ENA/DDBJ	https://www.ncbi.nlm.nih.gov/search/all/?term=KU950356
5076	ARCHIVES OF VIROLOGY	2016	10.1007/s00705-016-3048-8	yes			NCBI/ENA/DDBJ	https://www.ncbi.nlm.nih.gov/search/all/?term=LC123275
5080	FOOD MICROBIOLOGY	2016	10.1016/j.fm.2016.06.016	yes			NCBI/ENA/DDBJ	https://www.ncbi.nlm.nih.gov/sra/ERX1263261[accn]
5084	SCIENTIFIC REPORTS	2016	10.1038/srep37900	yes			NCBI/ENA/DDBJ	https://www.ncbi.nlm.nih.gov/bioproject/PRJEB402
5086	BMC MICROBIOLOGY	2016	10.1186/s12866-016-0898-x	yes			NCBI/ENA/DDBJ	https://ddbj.nig.ac.jp/DRASearch/query?keyword=DRA005068&show=20
5100	BMC MICROBIOLOGY	2016	10.1186/s12866-016-0894-1	yes			NCBI/ENA/DDBJ	https://www.ncbi.nlm.nih.gov/bioproject/PRJNA352508
5105	GENE	2016	10.1016/j.gene.2016.08.009	yes			NCBI/ENA/DDBJ	https://www.ncbi.nlm.nih.gov/nuccore/KU198630
5111	VIROLOGY JOURNAL	2016	10.1186/s12985-016-0642-z	yes			NCBI/ENA/DDBJ	https://www.ncbi.nlm.nih.gov/search/all/?term=KX898030
5119	PEERJ	2016	10.7717/peerj.2687	yes			NCBI/ENA/DDBJ	https://www.ncbi.nlm.nih.gov/bioproject/PRJNA297196
5123	BMC MICROBIOLOGY	2016	10.1186/s12866-016-0883-4	yes			NCBI/ENA/DDBJ	https://www.ncbi.nlm.nih.gov/sra/SRP026050
5130	MSYSTEMS	2016	10.1128/mSystems.00139-16	yes			NCBI/ENA/DDBJ	https://www.ncbi.nlm.nih.gov/sra/?term=PRJNA317389
5136	MBIO	2016	10.1128/mBio.01713-16	yes			NCBI/ENA/DDBJ	https://www.ncbi.nlm.nih.gov/bioproject/?term=phs000262
5154	ENVIRONMENTAL MICROBIOLOGY	2016	10.1111/1462-2920.13291	yes			NCBI/ENA/DDBJ	https://www.ncbi.nlm.nih.gov/sra/SRR1648122
5158	APPLIED AND ENVIRONMENTAL MICROBIOLOGY	2016	10.1128/AEM.02012-16	yes			NCBI/ENA/DDBJ	https://www.ncbi.nlm.nih.gov/sra/SRX2013848
5159	APPLIED AND ENVIRONMENTAL MICROBIOLOGY	2016	10.1128/AEM.01800-16	yes			NCBI/ENA/DDBJ	https://www.ncbi.nlm.nih.gov/bioproject/PRJNA322176
5160	APPLIED AND ENVIRONMENTAL MICROBIOLOGY	2016	10.1128/AEM.02022-16	yes			NCBI/ENA/DDBJ	https://www.ncbi.nlm.nih.gov/geo/query/acc.cgi?acc=GSE81240
5179	APPLIED MICROBIOLOGY AND BIOTECHNOLOGY	2016	10.1007/s00253-016-7780-5	yes			NCBI/ENA/DDBJ	https://www.ncbi.nlm.nih.gov/sra/SRX758589[accn]
5189	WATER RESEARCH	2016	10.1016/j.watres.2016.08.008	yes			NCBI/ENA/DDBJ	https://www.ncbi.nlm.nih.gov/nuccore/LN997328
5190	APPLIED AND ENVIRONMENTAL MICROBIOLOGY	2016	10.1128/AEM.01754-16	yes			NCBI/ENA/DDBJ	https://www.ncbi.nlm.nih.gov/nuccore/KU736866
5194	MOLECULAR ECOLOGY RESOURCES	2016	10.1111/1755-0998.12539	yes			NCBI/ENA/DDBJ	https://www.ncbi.nlm.nih.gov/nuccore/KT876876
5197	ARCHIVES OF VIROLOGY	2016	10.1007/s00705-016-3002-9	yes			NCBI/ENA/DDBJ	https://www.ncbi.nlm.nih.gov/nuccore/KX035107
5199	APPLIED MICROBIOLOGY AND BIOTECHNOLOGY	2016	10.1007/s00253-016-7765-4	yes			NCBI/ENA/DDBJ	https://www.ncbi.nlm.nih.gov/sra/?term=SRS499036
5205	VIROLOGY	2016	10.1016/j.virol.2016.07.031	yes			NCBI/ENA/DDBJ	https://www.ncbi.nlm.nih.gov/bioproject/PRJNA327220
5218	NATURE COMMUNICATIONS	2016	10.1038/ncomms13219	yes			NCBI/ENA/DDBJ	https://www.ncbi.nlm.nih.gov/bioproject/PRJNA288027
5225	PEERJ	2016	10.7717/peerj.2585	yes			NCBI/ENA/DDBJ	https://www.ncbi.nlm.nih.gov/sra?term=SRR3580070
5228	NATURE COMMUNICATIONS	2016	10.1038/ncomms12770	yes			NCBI/ENA/DDBJ	https://www.ncbi.nlm.nih.gov/sra/SRA246967
5236	NATURE COMMUNICATIONS	2016	10.1038/ncomms13155	yes			NCBI/ENA/DDBJ	https://www.ncbi.nlm.nih.gov/nuccore/KX522565.1
5241	MICROBIOME	2016	10.1186/s40168-016-0197-7	yes			NCBI/ENA/DDBJ	https://www.ncbi.nlm.nih.gov/sra/?term=SAMN04871419
5251	ENVIRONMENTAL MICROBIOLOGY REPORTS	2016	10.1111/1758-2229.12408	yes			NCBI/ENA/DDBJ	https://www.ncbi.nlm.nih.gov/sra/?term=SRS609813
5259	Nature Microbiology	2016	10.1038/NMICROBIOL.2016.146	yes			NCBI/ENA/DDBJ	https://www.ncbi.nlm.nih.gov/bioproject/PRJNA308326
5261	NATURE MICROBIOLOGY	2016	10.1038/NMICROBIOL.2016.131	yes			NCBI/ENA/DDBJ	https://www.ncbi.nlm.nih.gov/sra/ERX1284266[accn]
5275	ISME JOURNAL	2016	10.1038/ismej.2016.39	yes			NCBI/ENA/DDBJ	https://www.ebi.ac.uk/ena/data/view/PRJEB10932
5283	JOURNAL OF CLINICAL MICROBIOLOGY	2016	10.1128/JCM.00330-16	yes			NCBI/ENA/DDBJ	https://www.ncbi.nlm.nih.gov/sra/ERX1873554[accn]
5290	APPLIED MICROBIOLOGY AND BIOTECHNOLOGY	2016	10.1007/s00253-016-7730-2	yes			NCBI/ENA/DDBJ	https://www.ncbi.nlm.nih.gov/sra/SRX1041825
5291	BIORESOURCE TECHNOLOGY	2016	10.1016/j.biortech.2016.07.036	yes			NCBI/ENA/DDBJ	https://www.ncbi.nlm.nih.gov/sra/ERX1273643[accn]
5298	APPLIED AND ENVIRONMENTAL MICROBIOLOGY	2016	10.1128/AEM.01331-16	yes			NCBI/ENA/DDBJ	https://www.ncbi.nlm.nih.gov/nuccore/KF030726
5299	ARCHIVES OF VIROLOGY	2016	10.1007/s00705-016-2987-4	yes			NCBI/ENA/DDBJ	https://www.ncbi.nlm.nih.gov/nuccore/KT934307.1/
5303	APPLIED MICROBIOLOGY AND BIOTECHNOLOGY	2016	10.1007/s00253-016-7656-8	yes			NCBI/ENA/DDBJ	https://www.ncbi.nlm.nih.gov/sra/SRX1713180[accn]
5304	INFECTION GENETICS AND EVOLUTION	2016	10.1016/j.meegid.2016.06.052	yes			NCBI/ENA/DDBJ	https://www.ncbi.nlm.nih.gov/nuccore/KX266901.1/
5313	VIRUS GENES	2016	10.1007/s11262-016-1361-7	yes			NCBI/ENA/DDBJ	https://www.ncbi.nlm.nih.gov/nuccore/KT182636.1/
5314	VIRUS GENES	2016	10.1007/s11262-016-1342-x	yes			NCBI/ENA/DDBJ	https://www.ncbi.nlm.nih.gov/nuccore/KP202150.1/
5315	CHEMOSPHERE	2016	10.1016/j.chemosphere.2016.06.097	yes			NCBI/ENA/DDBJ	https://www.ncbi.nlm.nih.gov/sra/SRR2087753
5325	BMC BIOINFORMATICS	2016	10.1186/s12859-016-1270-8	yes			NCBI/ENA/DDBJ	https://www.ncbi.nlm.nih.gov/bioproject/PRJNA313102
5330	SCIENTIFIC DATA	2016	10.1038/sdata.2016.81	yes			NCBI/ENA/DDBJ	https://www.ncbi.nlm.nih.gov/sra/?term=SRX1836715
5354	WATER RESEARCH	2016	10.1016/j.watres.2016.05.092	yes			NCBI/ENA/DDBJ	https://www.ncbi.nlm.nih.gov/sra/SRR2140758
5357	PEERJ	2016	10.7717/peerj.2444	yes			NCBI/ENA/DDBJ	https://www.ncbi.nlm.nih.gov/biosample/SAMN05571407/
5358	PROCEEDINGS OF THE NATIONAL ACADEMY OF SCIENCES OF THE UNITED STATES OF AMERICA	2016	10.1073/pnas.1601060113	yes			NCBI/ENA/DDBJ	https://www.ncbi.nlm.nih.gov/sra/?term=SAMN04415496
5381	MBIO	2016	10.1128/mBio.01157-16	yes			NCBI/ENA/DDBJ	https://www.ncbi.nlm.nih.gov/geo/query/acc.cgi?acc=GSE75505
5385	ENVIRONMENTAL MICROBIOLOGY	2016	10.1111/1462-2920.13121	yes			NCBI/ENA/DDBJ	https://www.ncbi.nlm.nih.gov/bioproject/PRJNA285802
5394	ISME JOURNAL	2016	10.1038/ismej.2016.12	yes			NCBI/ENA/DDBJ	https://www.ncbi.nlm.nih.gov/sra/SRP061945
5397	JOURNAL OF CLINICAL MICROBIOLOGY	2016	10.1128/JCM.00877-16	yes			NCBI/ENA/DDBJ	https://www.ncbi.nlm.nih.gov/sra/?term=PRJNA329512
5403	NATURE MICROBIOLOGY	2016	10.1038/NMICROBIOL.2016.106	yes			NCBI/ENA/DDBJ	https://www.ncbi.nlm.nih.gov/sra?term=SRP056821
5424	FEMS MICROBIOLOGY ECOLOGY	2016	10.1093/femsec/fiw128	yes			NCBI/ENA/DDBJ	https://www.ncbi.nlm.nih.gov/sra/?term=SRR2134631
5425	FEMS MICROBIOLOGY ECOLOGY	2016	10.1093/femsec/fiw146	yes			NCBI/ENA/DDBJ	https://www.ncbi.nlm.nih.gov/sra/SRP076869
5426	FEMS MICROBIOLOGY ECOLOGY	2016	10.1093/femsec/fiw147	yes			NCBI/ENA/DDBJ	https://www.ncbi.nlm.nih.gov/sra/SRX1482428[accn]
5435	APPLIED MICROBIOLOGY AND BIOTECHNOLOGY	2016	10.1007/s00253-016-7655-9	yes			NCBI/ENA/DDBJ	https://www.ncbi.nlm.nih.gov/sra/SRP053269
5439	MOLECULAR ECOLOGY RESOURCES	2016	10.1111/1755-0998.12525	yes			NCBI/ENA/DDBJ	https://www.ncbi.nlm.nih.gov/nuccore/KU053508
5441	SYSTEMATIC AND APPLIED MICROBIOLOGY	2016	10.1016/j.syapm.2016.06.007	yes			NCBI/ENA/DDBJ	https://www.ncbi.nlm.nih.gov/sra/SRP074140
5457	NATURE	2016	10.1038/nature19085	yes			NCBI/ENA/DDBJ	https://www.ebi.ac.uk/ena/data/view/PRJEB14494
5459	VIROLOGY	2016	10.1016/j.virol.2016.06.013	yes			NCBI/ENA/DDBJ	https://www.ncbi.nlm.nih.gov/nuccore/KT868810
5460	APPLIED AND ENVIRONMENTAL MICROBIOLOGY	2016	10.1128/AEM.00916-16	yes			NCBI/ENA/DDBJ	https://www.ncbi.nlm.nih.gov/sra/?term=SRP060024
5463	ARCHIVES OF VIROLOGY	2016	10.1007/s00705-016-2937-1	yes			NCBI/ENA/DDBJ	https://www.ncbi.nlm.nih.gov/nuccore/KU764484
5468	BIORESOURCE TECHNOLOGY	2016	10.1016/j.biortech.2016.05.081	yes			NCBI/ENA/DDBJ	https://www.ncbi.nlm.nih.gov/sra/SRP058235
5475	INFECTION GENETICS AND EVOLUTION	2016	10.1016/j.meegid.2016.05.018	yes			NCBI/ENA/DDBJ	https://www.ncbi.nlm.nih.gov/nuccore/KP982879
5482	BMC MICROBIOLOGY	2016	10.1186/s12866-016-0817-1	yes			NCBI/ENA/DDBJ	https://www.ncbi.nlm.nih.gov/nuccore/CP011806.1
5486	VIROLOGY JOURNAL	2016	10.1186/s12985-016-0601-8	yes			NCBI/ENA/DDBJ	https://www.ncbi.nlm.nih.gov/nuccore/KX262893.1/
5500	JOURNAL OF BIOTECHNOLOGY	2016	10.1016/j.jbiotec.2015.08.001	yes			NCBI/ENA/DDBJ	https://www.ncbi.nlm.nih.gov/nuccore/HG917868
5501	JOURNAL OF BIOTECHNOLOGY	2016	10.1016/j.jbiotec.2016.05.001	yes			NCBI/ENA/DDBJ	https://www.ncbi.nlm.nih.gov/nuccore/LN824141.1/
5512	BIOTECHNOLOGY FOR BIOFUELS	2016	10.1186/s13068-016-0581-3	yes			NCBI/ENA/DDBJ	https://www.ncbi.nlm.nih.gov/bioproject/PRJEB12913
5513	NATURE	2016	10.1038/nature19068	yes			NCBI/ENA/DDBJ	https://www.ncbi.nlm.nih.gov/bioproject/PRJNA291283
5518	JOURNAL OF BIOTECHNOLOGY	2016	10.1016/j.jbiotec.2016.06.014	yes			NCBI/ENA/DDBJ	https://www.ncbi.nlm.nih.gov/sra/?term=SRA357223
5520	BMC GENOMICS	2016	10.1186/s12864-016-2873-1	yes			NCBI/ENA/DDBJ	https://www.ebi.ac.uk/ena/data/view/PRJEB14440
5531	FRONTIERS IN MICROBIOLOGY	2016	10.3389/fmicb.2016.01227	yes			NCBI/ENA/DDBJ	https://www.ebi.ac.uk/ena/data/view/PRJEB11827
5539	JOURNAL OF GENERAL VIROLOGY	2016	10.1099/jgv.0.000492	yes			NCBI/ENA/DDBJ	https://www.ncbi.nlm.nih.gov/nuccore/KU159357
5543	ENVIRONMENTAL MICROBIOLOGY	2016	10.1111/1462-2920.13374	yes			NCBI/ENA/DDBJ	https://www.ncbi.nlm.nih.gov/bioproject/PRJNA293354
5544	ENVIRONMENTAL MICROBIOLOGY	2016	10.1111/1462-2920.13411	yes			NCBI/ENA/DDBJ	https://www.ncbi.nlm.nih.gov/bioproject/PRJNA309720
5550	NATURE MICROBIOLOGY	2016	10.1038/NMICROBIOL.2016.88	yes			NCBI/ENA/DDBJ	https://www.ebi.ac.uk/ena/data/view/ERA000116
5556	MOLECULAR ECOLOGY	2016	10.1111/mec.13739	yes			NCBI/ENA/DDBJ	https://www.ncbi.nlm.nih.gov/bioproject/PRJEB9175
5560	VIRUS GENES	2016	10.1007/s11262-016-1322-1	yes			NCBI/ENA/DDBJ	https://www.ncbi.nlm.nih.gov/nuccore/KU563733
5564	ISME JOURNAL	2016	10.1038/ismej.2015.265	yes			NCBI/ENA/DDBJ	https://www.ncbi.nlm.nih.gov/bioproject/PRJNA13694
5565	ISME JOURNAL	2016	10.1038/ismej.2015.258	yes			NCBI/ENA/DDBJ	https://www.ncbi.nlm.nih.gov/sra/ERX639190
5581	ENVIRONMENTAL MICROBIOLOGY REPORTS	2016	10.1111/1758-2229.12412	yes			NCBI/ENA/DDBJ	https://www.ncbi.nlm.nih.gov/bioproject/PRJNA295144/
5596	FOOD MICROBIOLOGY	2016	10.1016/j.fm.2016.02.004	yes			NCBI/ENA/DDBJ	https://www.ncbi.nlm.nih.gov/sra?LinkName=biosample_sra&from_uid=3771674
5600	MICROBIOME	2016	10.1186/s40168-016-0185-y	yes			NCBI/ENA/DDBJ	https://www.ncbi.nlm.nih.gov/bioproject/PRJEB12607
5601	VIROLOGY JOURNAL	2016	10.1186/s12985-016-0589-0	yes			NCBI/ENA/DDBJ	https://www.ncbi.nlm.nih.gov/nuccore/KX272741
5609	BIOTECHNOLOGY FOR BIOFUELS	2016	10.1186/s13068-016-0565-3	yes			NCBI/ENA/DDBJ	https://www.ncbi.nlm.nih.gov/sra/?term=SRA357213
5619	NATURE	2016	10.1038/nature18927	yes			NCBI/ENA/DDBJ	https://www.ncbi.nlm.nih.gov/sra/SRX1642375[accn]
5620	NATURE	2016	10.1038/nature18646	yes			NCBI/ENA/DDBJ	https://www.ebi.ac.uk/ena/data/view/PRJEB4336
5640	MICROBIOME	2016	10.1186/s40168-016-0181-2	yes			NCBI/ENA/DDBJ	https://www.ncbi.nlm.nih.gov/bioproject/PRJNA313232
5641	VIROLOGY JOURNAL	2016	10.1186/s12985-016-0580-9	yes			NCBI/ENA/DDBJ	https://www.ncbi.nlm.nih.gov/search/all/?term=KX430795
5644	SCIENTIFIC DATA	2016	10.1038/sdata.2016.50	yes			NCBI/ENA/DDBJ	https://www.ncbi.nlm.nih.gov/bioproject/PRJNA289734
5645	ENVIRONMENTAL SCIENCE & TECHNOLOGY	2016	10.1021/acs.est.6b00619	yes			NCBI/ENA/DDBJ	https://www.ncbi.nlm.nih.gov/sra/SRR3321803
5646	VIROLOGY JOURNAL	2016	10.1186/s12985-016-0583-6	yes			NCBI/ENA/DDBJ	https://www.ncbi.nlm.nih.gov/nuccore/KX082661
5647	BIOTECHNOLOGY FOR BIOFUELS	2016	10.1186/s13068-016-0557-3	yes			NCBI/ENA/DDBJ	https://www.ncbi.nlm.nih.gov/nuccore/KU168144.1/
5657	NATURE MICROBIOLOGY	2016	10.1038/NMICROBIOL.2016.57	yes			NCBI/ENA/DDBJ	https://www.ncbi.nlm.nih.gov/bioproject/PRJNA301966
5665	JOURNAL OF GENERAL VIROLOGY	2016	10.1099/jgv.0.000476	yes			NCBI/ENA/DDBJ	https://www.ncbi.nlm.nih.gov/nuccore/KU867071.1/
5666	MBIO	2016	10.1128/mBio.00805-16	yes			NCBI/ENA/DDBJ	https://www.ncbi.nlm.nih.gov/nuccore/KT997784
5668	MBIO	2016	10.1128/mBio.00874-16	yes			NCBI/ENA/DDBJ	https://www.ncbi.nlm.nih.gov/nuccore/KU977108.1/
5682	APPLIED MICROBIOLOGY AND BIOTECHNOLOGY	2016	10.1007/s00253-016-7385-z	yes			NCBI/ENA/DDBJ	https://www.ncbi.nlm.nih.gov/nuccore/KP692205.1/
5690	EXTREMOPHILES	2016	10.1007/s00792-016-0835-9	yes			NCBI/ENA/DDBJ	https://www.ncbi.nlm.nih.gov/nuccore/KT862834.1/
5691	EXTREMOPHILES	2016	10.1007/s00792-016-0846-6	yes			NCBI/ENA/DDBJ	https://www.ncbi.nlm.nih.gov/sra/?term=SRX643298
5702	ISME JOURNAL	2016	10.1038/ismej.2015.236	yes			NCBI/ENA/DDBJ	https://www.ncbi.nlm.nih.gov/sra/?term=SRP052737
5704	APPLIED AND ENVIRONMENTAL MICROBIOLOGY	2016	10.1128/AEM.00793-16	yes			NCBI/ENA/DDBJ	https://www.ncbi.nlm.nih.gov/sra/SRP072347
5709	MICROBIAL ECOLOGY	2016	10.1007/s00248-016-0766-0	yes			NCBI/ENA/DDBJ	https://www.ncbi.nlm.nih.gov/sra/SRP057821
5717	WATER RESEARCH	2016	10.1016/j.watres.2016.04.031	yes			NCBI/ENA/DDBJ	https://www.ncbi.nlm.nih.gov//bioproject/PRJNA264454
5734	SCIENTIFIC REPORTS	2016	10.1038/srep28526	yes			NCBI/ENA/DDBJ	https://www.ncbi.nlm.nih.gov/nuccore/KU587555
5741	JOURNAL OF BIOTECHNOLOGY	2016	10.1016/j.jbiotec.2016.04.034	yes			NCBI/ENA/DDBJ	https://www.ncbi.nlm.nih.gov/nuccore/KC014616
5761	MICROBIOME	2016	10.1186/s40168-016-0173-2	yes			NCBI/ENA/DDBJ	https://www.ncbi.nlm.nih.gov/sra/ERX1304106[accn]
5764	PROCEEDINGS OF THE NATIONAL ACADEMY OF SCIENCES OF THE UNITED STATES OF AMERICA	2016	10.1073/pnas.1524865113	yes			NCBI/ENA/DDBJ	https://www.ncbi.nlm.nih.gov/nuccore/KU377785
5770	NATURE	2016	10.1038/nature18301	yes			NCBI/ENA/DDBJ	https://www.ncbi.nlm.nih.gov/sra/ERP006059
5773	BIOTECHNOLOGY FOR BIOFUELS	2016	10.1186/s13068-016-0534-x	yes			NCBI/ENA/DDBJ	https://www.ncbi.nlm.nih.gov/bioproject/PRJNA301928
5782	GIGASCIENCE	2016	10.1186/s13742-016-0129-2	yes			NCBI/ENA/DDBJ	https://www.ncbi.nlm.nih.gov/bioproject/PRJEB12428
5787	NATURE MICROBIOLOGY	2016	10.1038/NMICROBIOL.2016.35	yes			NCBI/ENA/DDBJ	https://www.ncbi.nlm.nih.gov/bioproject/PRJNA312413
5794	ENVIRONMENTAL MICROBIOLOGY	2016	10.1111/1462-2920.13173	yes			NCBI/ENA/DDBJ	https://www.ncbi.nlm.nih.gov/bioproject/PRJNA258374
5796	ENVIRONMENTAL MICROBIOLOGY	2016	10.1111/1462-2920.13259	yes			NCBI/ENA/DDBJ	https://www.ncbi.nlm.nih.gov/sra/?term=SRP064713
5811	JOURNAL OF GENERAL VIROLOGY	2016	10.1099/jgv.0.000461	yes			NCBI/ENA/DDBJ	https://www.ncbi.nlm.nih.gov/nuccore/KT833062
5825	PEERJ	2016	10.7717/peerj.2055	yes			NCBI/ENA/DDBJ	https://trace.ncbi.nlm.nih.gov/Traces/sra/sra.cgi?run=SRR1714820
5840	ARCHIVES OF VIROLOGY	2016	10.1007/s00705-016-2834-7	yes			NCBI/ENA/DDBJ	https://www.ncbi.nlm.nih.gov/search/all/?term=LC113907
5850	JOURNAL OF MICROBIOLOGICAL METHODS	2016	10.1016/j.mimet.2016.04.011	yes			NCBI/ENA/DDBJ	https://www.ebi.ac.uk/ena/data/view/PRJEB13290
5855	APPLIED MICROBIOLOGY AND BIOTECHNOLOGY	2016	10.1007/s00253-016-7312-3	yes			NCBI/ENA/DDBJ	https://www.ncbi.nlm.nih.gov/sra/?term=SRS543595
5863	VIROLOGY	2016	10.1016/j.virol.2016.03.009	yes			NCBI/ENA/DDBJ	https://www.ncbi.nlm.nih.gov/nuccore/KU720628
5872	BMC GENOMICS	2016	10.1186/s12864-016-2700-8	yes			NCBI/ENA/DDBJ	https://www.ncbi.nlm.nih.gov/sra/?term=SRP068182
5876	NATURE	2016	10.1038/nature17645	yes			NCBI/ENA/DDBJ	https://www.ncbi.nlm.nih.gov/sra/ERX1101425[accn]
5878	BMC MICROBIOLOGY	2016	10.1186/s12866-016-0708-5	yes			NCBI/ENA/DDBJ	https://ddbj.nig.ac.jp/DRASearch/query?organism=freshwater%20metagenome
5889	GIGASCIENCE	2016	10.1186/s13742-016-0126-5	yes			NCBI/ENA/DDBJ	https://www.ncbi.nlm.nih.gov/bioproject/PRJNA317932
5911	PROCEEDINGS OF THE NATIONAL ACADEMY OF SCIENCES OF THE UNITED STATES OF AMERICA	2016	10.1073/pnas.1600338113	yes			NCBI/ENA/DDBJ	https://www.ncbi.nlm.nih.gov/sra/ERX1225980[accn]
5912	NATURE MICROBIOLOGY	2016	10.1038/NMICROBIOL.2016.34	yes			NCBI/ENA/DDBJ	https://www.ncbi.nlm.nih.gov/nuccore/JYIM01000001
5928	FEMS MICROBIOLOGY ECOLOGY	2016	10.1093/femsec/fiw053	yes			NCBI/ENA/DDBJ	https://www.ncbi.nlm.nih.gov/sra/?term=SRX042535
5929	FEMS MICROBIOLOGY ECOLOGY	2016	10.1093/femsec/fiw046	yes			NCBI/ENA/DDBJ	https://www.ncbi.nlm.nih.gov/nuccore/KT956050.1/
5944	APPLIED AND ENVIRONMENTAL MICROBIOLOGY	2016	10.1128/AEM.03529-15	yes			NCBI/ENA/DDBJ	https://www.ncbi.nlm.nih.gov/bioproject/PRJNA299404
5961	JOURNAL OF MICROBIOLOGICAL METHODS	2016	10.1016/j.mimet.2016.02.018	yes			NCBI/ENA/DDBJ	https://www.ncbi.nlm.nih.gov/sra/SRP062125
5977	MSYSTEMS	2016	10.1128/mSystems.00018-16	yes			NCBI/ENA/DDBJ	https://www.ncbi.nlm.nih.gov/bioproject/PRJNA301589/
5988	BMC BIOINFORMATICS	2016	10.1186/s12859-016-1061-2	yes			NCBI/ENA/DDBJ	https://www.ncbi.nlm.nih.gov/sra/SRX1429073[accn]
5991	SCIENCE	2016	10.1126/science.aad8852	yes			NCBI/ENA/DDBJ	https://www.ncbi.nlm.nih.gov/sra/ERX1369184[accn]
5997	NATURE	2016	10.1038/nature16942	yes			NCBI/ENA/DDBJ	https://www.ebi.ac.uk/ena/data/view/PRJEB402
5998	FRONTIERS IN MICROBIOLOGY	2016	10.3389/fmicb.2016.00598	yes			NCBI/ENA/DDBJ	https://www.ncbi.nlm.nih.gov/search/all/?term=SRR2986055
6006	PLOS ONE	2016	10.1371/journal.pone.0154389	yes			NCBI/ENA/DDBJ	https://www.ncbi.nlm.nih.gov/sra/DRA004261
6016	PLOS ONE	2016	10.1371/journal.pone.0153554	yes			NCBI/ENA/DDBJ	https://www.ncbi.nlm.nih.gov/bioproject/PRJNA300959
6018	INTERNATIONAL JOURNAL OF FOOD MICROBIOLOGY	2016	10.1016/j.ijfoodmicro.2016.02.008	yes			NCBI/ENA/DDBJ	https://www.ncbi.nlm.nih.gov/sra/SRP066046
6020	CHEMICAL ENGINEERING JOURNAL	2016	10.1016/j.cej.2016.01.024	yes			NCBI/ENA/DDBJ	https://www.ncbi.nlm.nih.gov/sra/SRR2297240
6030	PEERJ	2016	10.7717/peerj.1924	yes			NCBI/ENA/DDBJ	https://www.ncbi.nlm.nih.gov/sra/?term=SRA304624
6034	PLOS ONE	2016	10.1371/journal.pone.0152671	yes			NCBI/ENA/DDBJ	https://www.ncbi.nlm.nih.gov/sra/SRP061842
6040	NATURE MICROBIOLOGY	2016	10.1038/NMICROBIOL.2016.24	yes			NCBI/ENA/DDBJ	https://www.ncbi.nlm.nih.gov/sra/SRX1551675[accn]
6053	ENVIRONMENTAL POLLUTION	2016	10.1016/j.envpol.2015.12.023	yes			NCBI/ENA/DDBJ	https://www.ncbi.nlm.nih.gov/sra?term=SRP039858&cmd=DetailsSearch
6078	APPLIED MICROBIOLOGY AND BIOTECHNOLOGY	2016	10.1007/s00253-015-7257-y	yes			NCBI/ENA/DDBJ	https://www.ncbi.nlm.nih.gov/sra/?term=SRA278746
6090	ARCHIVES OF VIROLOGY	2016	10.1007/s00705-015-2726-2	yes			NCBI/ENA/DDBJ	https://www.ncbi.nlm.nih.gov/nuccore/KR827412
6094	JOURNAL OF MICROBIOLOGICAL METHODS	2016	10.1016/j.mimet.2016.02.013	yes			NCBI/ENA/DDBJ	https://www.ncbi.nlm.nih.gov/nuccore/KU664125.1/
6103	JOURNAL OF APPLIED MICROBIOLOGY	2016	10.1111/jam.13072	yes			NCBI/ENA/DDBJ	https://www.ncbi.nlm.nih.gov/bioproject/PRJNA255111
6113	INFECTION GENETICS AND EVOLUTION	2016	10.1016/j.meegid.2016.02.009	yes			NCBI/ENA/DDBJ	https://www.ncbi.nlm.nih.gov/nuccore/KT732783.1/
6114	INFECTION GENETICS AND EVOLUTION	2016	10.1016/j.meegid.2016.02.011	yes			NCBI/ENA/DDBJ	https://www.ncbi.nlm.nih.gov/nuccore/KP153359
6119	MICROBIAL ECOLOGY	2016	10.1007/s00248-015-0696-2	yes			NCBI/ENA/DDBJ	https://www.ncbi.nlm.nih.gov/bioproject/PRJEB5429
6120	MICROBIAL ECOLOGY	2016	10.1007/s00248-015-0659-7	yes			NCBI/ENA/DDBJ	https://www.ncbi.nlm.nih.gov/sra/SRX862733[accn]
6121	MICROBIAL ECOLOGY	2016	10.1007/s00248-015-0697-1	yes			NCBI/ENA/DDBJ	https://www.ncbi.nlm.nih.gov/sra/?term=SRP062304
6129	BIORESOURCE TECHNOLOGY	2016	10.1016/j.biortech.2016.01.007	yes			NCBI/ENA/DDBJ	https://www.ncbi.nlm.nih.gov/bioproject/PRJNA293416
6137	PEERJ	2016	10.7717/peerj.1839	yes			NCBI/ENA/DDBJ	https://www.ncbi.nlm.nih.gov/bioproject/PRJEB11910
6162	WATER RESEARCH	2016	10.1016/j.watres.2015.11.071	yes			NCBI/ENA/DDBJ	https://www.ncbi.nlm.nih.gov/sra/SRS948177
6175	FRONTIERS IN MICROBIOLOGY	2016	10.3389/fmicb.2016.00263	yes			NCBI/ENA/DDBJ	https://www.ncbi.nlm.nih.gov/nuccore/KC211303.1/
6185	MSPHERE	2016	10.1128/mSphere.00057-16	yes			NCBI/ENA/DDBJ	https://www.ncbi.nlm.nih.gov/sra?linkname=bioproject_sra_all&from_uid=291686
6186	NATURE MICROBIOLOGY	2016	10.1038/NMICROBIOL.2016.2	yes			NCBI/ENA/DDBJ	https://www.ncbi.nlm.nih.gov/bioproject/PRJNA298487
6188	MBIO	2016	10.1128/mBio.02234-15	yes			NCBI/ENA/DDBJ	https://www.ncbi.nlm.nih.gov/nuccore/LVJP00000000.1
6189	MBIO	2016	10.1128/mBio.02214-15	yes			NCBI/ENA/DDBJ	https://www.ncbi.nlm.nih.gov/bioproject/PRJNA313201
6199	VIRUSES-BASEL	2016	10.3390/v8030077	yes			NCBI/ENA/DDBJ	https://www.mg-rast.org/mgmain.html?mgpage=search&search=4604249.3
6202	APPLIED AND ENVIRONMENTAL MICROBIOLOGY	2016	10.1128/AEM.03381-15	yes			NCBI/ENA/DDBJ	https://www.ncbi.nlm.nih.gov/bioproject/PRJNA279271
6203	APPLIED AND ENVIRONMENTAL MICROBIOLOGY	2016	10.1128/AEM.02730-15	yes			NCBI/ENA/DDBJ	https://www.ncbi.nlm.nih.gov/bioproject/PRJNA300413
6207	FEMS MICROBIOLOGY ECOLOGY	2016	10.1093/femsec/fiw003	yes			NCBI/ENA/DDBJ	https://www.ncbi.nlm.nih.gov/sra/?term=SAMEA3333506
6208	FEMS MICROBIOLOGY ECOLOGY	2016	10.1093/femsec/fiw018	yes			NCBI/ENA/DDBJ	https://www.ebi.ac.uk/ena/data/view/PRJEB11799
6211	FEMS MICROBIOLOGY ECOLOGY	2016	10.1093/femsec/fiw023	yes			NCBI/ENA/DDBJ	https://www.ncbi.nlm.nih.gov/sra/SRX485237[accn]
6237	APPLIED MICROBIOLOGY AND BIOTECHNOLOGY	2016	10.1007/s00253-015-7097-9	yes			NCBI/ENA/DDBJ	https://www.ncbi.nlm.nih.gov/nuccore/KM873028.1/
6239	ENVIRONMENTAL SCIENCE & TECHNOLOGY	2016	10.1021/acs.est.5b05054	yes			NCBI/ENA/DDBJ	https://www.ncbi.nlm.nih.gov/sra/SRR2541828
6250	PROCEEDINGS OF THE NATIONAL ACADEMY OF SCIENCES OF THE UNITED STATES OF AMERICA	2016	10.1073/pnas.1518189113	yes			NCBI/ENA/DDBJ	https://www.ncbi.nlm.nih.gov/sra/SRP062583
6265	MOLECULAR ECOLOGY RESOURCES	2016	10.1111/1755-0998.12463	yes			NCBI/ENA/DDBJ	https://www.ncbi.nlm.nih.gov/sra/SRR2387885
6274	SCIENTIFIC REPORTS	2016	10.1038/srep21952	yes			NCBI/ENA/DDBJ	https://www.ncbi.nlm.nih.gov/sra/?term=PRJNA285379
6295	BIOTECHNOLOGY FOR BIOFUELS	2016	10.1186/s13068-016-0449-6	yes			NCBI/ENA/DDBJ	https://www.ncbi.nlm.nih.gov/nuccore/KR780677.1/
6296	PLOS ONE	2016	10.1371/journal.pone.0149095	yes			NCBI/ENA/DDBJ	https://www.ncbi.nlm.nih.gov/bioproject/PRJEB9034
6304	SCIENTIFIC REPORTS	2016	10.1038/srep20701	yes			NCBI/ENA/DDBJ	https://www.ncbi.nlm.nih.gov/sra/SRP057951
6318	BIOTECHNOLOGY FOR BIOFUELS	2016	10.1186/s13068-016-0441-1	yes			NCBI/ENA/DDBJ	https://www.ncbi.nlm.nih.gov/bioproject/PRJNA283298
6336	VIRUSES-BASEL	2016	10.3390/v8020036	yes			NCBI/ENA/DDBJ	https://www.ncbi.nlm.nih.gov/nuccore/FJ914390.1/
6339	ENVIRONMENTAL MICROBIOLOGY REPORTS	2016	10.1111/1758-2229.12337	yes			NCBI/ENA/DDBJ	https://www.ncbi.nlm.nih.gov/sra/?term=SRX1143757
6348	NATURE COMMUNICATIONS	2016	10.1038/ncomms10464	yes			NCBI/ENA/DDBJ	https://www.ncbi.nlm.nih.gov/sra?term=SRA009489
6350	VIROLOGY	2016	10.1016/j.virol.2015.12.002	yes			NCBI/ENA/DDBJ	https://www.ncbi.nlm.nih.gov/nuccore/KM203656.1/
6360	VIRUS GENES	2016	10.1007/s11262-015-1262-1	yes			NCBI/ENA/DDBJ	https://www.ncbi.nlm.nih.gov/search/all/?term=KT716186
6362	APPLIED AND ENVIRONMENTAL MICROBIOLOGY	2016	10.1128/AEM.03306-15	yes			NCBI/ENA/DDBJ	https://www.ncbi.nlm.nih.gov/sra/SRX1419392[accn]
6372	JOURNAL OF CLINICAL MICROBIOLOGY	2016	10.1128/JCM.01965-15	yes			NCBI/ENA/DDBJ	https://www.ncbi.nlm.nih.gov/bioproject/PRJNA293986
6373	MICROBIAL ECOLOGY	2016	10.1007/s00248-015-0671-y	yes			NCBI/ENA/DDBJ	https://www.ncbi.nlm.nih.gov/sra/SRX080962
6377	ISME JOURNAL	2016	10.1038/ismej.2015.109	yes			NCBI/ENA/DDBJ	https://www.ncbi.nlm.nih.gov/sra/SRR1151110
6379	ISME JOURNAL	2016	10.1038/ismej.2015.124	yes			NCBI/ENA/DDBJ	https://www.ncbi.nlm.nih.gov/bioproject/PRJNA264605
6385	GENE	2016	10.1016/j.gene.2015.10.018	yes			NCBI/ENA/DDBJ	https://www.ncbi.nlm.nih.gov/nuccore/AB969736.1/
6387	GENE	2016	10.1016/j.gene.2015.10.025	yes			NCBI/ENA/DDBJ	https://www.ncbi.nlm.nih.gov/sra/DRX020285[accn]
6389	GENE	2016	10.1016/j.gene.2015.10.026	yes			NCBI/ENA/DDBJ	https://www.ncbi.nlm.nih.gov/sra/?term=DRA002426
6396	BIOTECHNOLOGY FOR BIOFUELS	2016	10.1186/s13068-016-0440-2	yes			NCBI/ENA/DDBJ	https://www.ncbi.nlm.nih.gov/sra/SRX546138[accn]
6397	PEERJ	2016	10.7717/peerj.1607	yes			NCBI/ENA/DDBJ	https://www.ncbi.nlm.nih.gov/sra/SRX1085370
6428	BMC GENOMICS	2016	10.1186/s12864-015-2194-9	yes			NCBI/ENA/DDBJ	https://www.ebi.ac.uk/ena/data/view/PRJEB6244
6429	BMC GENOMICS	2016	10.1186/s12864-016-2380-4	yes			NCBI/ENA/DDBJ	https://www.ncbi.nlm.nih.gov/bioproject/291832
6464	MSPHERE	2016	10.1128/mSphere.00054-15	yes			NCBI/ENA/DDBJ	https://www.ncbi.nlm.nih.gov/bioproject/PRJNA301005/
6535	MBIO	2016	10.1128/mBio.01669-15	yes			NCBI/ENA/DDBJ	https://www.ncbi.nlm.nih.gov/bioproject/PRJNA278302/
6536	MBIO	2016	10.1128/mBio.01948-15	yes			NCBI/ENA/DDBJ	https://www.ncbi.nlm.nih.gov/bioproject/46333
6537	VIRUSES-BASEL	2016	10.3390/v8010014	yes			NCBI/ENA/DDBJ	https://www.ncbi.nlm.nih.gov/bioproject/PRJNA287316
6545	FEMS MICROBIOLOGY ECOLOGY	2016	10.1093/femsec/fiv138	yes			NCBI/ENA/DDBJ	https://www.ncbi.nlm.nih.gov/search/all/?term=SRX672050
6547	FEMS MICROBIOLOGY ECOLOGY	2016	10.1093/femsec/fiv149	yes			NCBI/ENA/DDBJ	https://www.ncbi.nlm.nih.gov/sra/SRP064292
6552	ENVIRONMENTAL MICROBIOLOGY	2016	10.1111/1462-2920.12907	yes			NCBI/ENA/DDBJ	https://www.ncbi.nlm.nih.gov/nuccore/JYNY00000000.1
6553	ENVIRONMENTAL MICROBIOLOGY	2016	10.1111/1462-2920.12930	yes			NCBI/ENA/DDBJ	https://www.ncbi.nlm.nih.gov/biosample/SAMN03092877/
6567	INFECTION GENETICS AND EVOLUTION	2016	10.1016/j.meegid.2015.11.023	yes			NCBI/ENA/DDBJ	https://www.ncbi.nlm.nih.gov/nuccore/KT731538.1/
6570	NATURE COMMUNICATIONS	2016	10.1038/ncomms10410	yes			NCBI/ENA/DDBJ	https://www.ebi.ac.uk/ena/data/view/PRJEB11685
6572	ENVIRONMENTAL POLLUTION	2016	10.1016/j.envpol.2015.11.001	yes			NCBI/ENA/DDBJ	https://www.ncbi.nlm.nih.gov/sra/?term=SRA307262
6584	INTERNATIONAL JOURNAL OF BIOLOGICAL MACROMOLECULES	2016	10.1016/j.ijbiomac.2015.09.018	yes			NCBI/ENA/DDBJ	https://www.ncbi.nlm.nih.gov/nuccore/CP003063
6585	INTERNATIONAL JOURNAL OF BIOLOGICAL MACROMOLECULES	2016	10.1016/j.ijbiomac.2015.10.067	yes			NCBI/ENA/DDBJ	https://www.ncbi.nlm.nih.gov/nuccore/KC684422
6590	APPLIED AND ENVIRONMENTAL MICROBIOLOGY	2016	10.1128/AEM.02017-15	yes			NCBI/ENA/DDBJ	https://www.ncbi.nlm.nih.gov/nuccore/JXWO00000000
6591	APPLIED AND ENVIRONMENTAL MICROBIOLOGY	2016	10.1128/AEM.02772-15	yes			NCBI/ENA/DDBJ	https://www.ncbi.nlm.nih.gov/sra/SRX902929
6595	MICROBIAL ECOLOGY	2016	10.1007/s00248-015-0698-0	yes			NCBI/ENA/DDBJ	https://www.ncbi.nlm.nih.gov/sra/?term=SRR1974485
6606	FRONTIERS IN MARINE SCIENCE	2016	10.3389/fmars.2016.00196	yes			NCBI/ENA/DDBJ	https://www.ncbi.nlm.nih.gov/nuccore/MEID00000000.1/
6607	FRONTIERS IN MARINE SCIENCE	2016	10.3389/fmars.2016.00023	yes			NCBI/ENA/DDBJ	https://www.ncbi.nlm.nih.gov/sra/?term=SAMN03653376
6608	FRONTIERS IN MARINE SCIENCE	2016	10.3389/fmars.2016.00104	yes			NCBI/ENA/DDBJ	https://www.ncbi.nlm.nih.gov/search/all/?term=SRP063380
6623	BIORESOURCE TECHNOLOGY	2016	10.1016/j.biortech.2015.10.078	yes			NCBI/ENA/DDBJ	https://www.ncbi.nlm.nih.gov/bioproject/PRJNA290510
1116	FRONTIERS IN CELLULAR AND INFECTION MICROBIOLOGY	2018	10.3389/fcimb.2018.00364	yes			NCBI/ENA/DDBJ	https://www.ncbi.nlm.nih.gov/nuccore/MH193505.1/
50	BMC MICROBIOLOGY	2019	10.1186/s12866-019-1448-0	yes			NCBI/ENA/DDBJ	https://www.ncbi.nlm.nih.gov/sra/SRX2242726[accn]
3370	MICROBIOME	2017	10.1186/s40168-017-0360-9	yes			other	https://bitbucket.org/berkeleylab/bacterialdiversity/src/master/sequences/
1779	ISME JOURNAL	2018	10.1038/s41396-018-0078-0	yes			other	https://ggkbase.berkeley.edu/novel_sulfate_reducers/organisms
6070	ENVIRONMENTAL MICROBIOLOGY	2016	10.1111/1462-2920.13138	yes			other	https://ggkbase.berkeley.edu/organisms/1596
1843	FRONTIERS IN CELLULAR AND INFECTION MICROBIOLOGY	2018	10.3389/fcimb.2018.00205	yes			other	http://bigd.big.ac.cn/search?dbId=gsa&q=PRJCA000880
4976	PEERJ	2016	10.7717/peerj.2777	yes			other	http://datacommons.cyverse.org/browse/iplant/home/shared/iVirus/DNA_Viromes_library_comparison
6249	PROCEEDINGS OF THE NATIONAL ACADEMY OF SCIENCES OF THE UNITED STATES OF AMERICA	2016	10.1073/pnas.1525139113	yes			other	http://datacommons.cyverse.org/browse/iplant/home/shared/iVirus/TOV_4_metaproteomes
1002	JOURNAL OF MICROBIOLOGICAL METHODS	2018	10.1016/j.mimet.2018.09.019	yes			other	https://data.mendeley.com/datasets/c3yzpm2428/1
4435	WATER RESEARCH	2017	10.1016/j.watres.2017.01.014	yes			other	http://metavir-meb.univ-bpclermont.fr/index.php?page=Welcome
2871	SYSTEMATIC AND APPLIED MICROBIOLOGY	2018	10.1016/j.syapm.2017.09.006	yes			other	https://www.biosino.org/node/project/detail/OEP000084
4296	NATURE	2017	10.1038/nature21674	yes			other	https://www.oagr.org.au/experiment/view/65/
4516	MOLECULAR ECOLOGY	2017	10.1111/mec.14011	yes			other	https://scholarsbank.uoregon.edu/xmlui/handle/1794/20650
3397	NATURE	2017	10.1038/nature23889	yes			other	https://www.hmpdacc.org/
514	PEERJ	2019	10.7717/peerj.6316	yes			other	https://zenodo.org/record/1252799#.XRXfCZP7T1I
2179	ENVIRONMENTAL SCIENCE & TECHNOLOGY	2018	10.1021/acs.est.8b00314	yes u/r			MG-RAST	https://www.mg-rast.org/linkin.cgi?project=mgp1139	"insufficient permissions to view this data"
123	NATURE MICROBIOLOGY	2019	10.1038/s41564-018-0337-x	yes u/r			NCBI/ENA/DDBJ	https://www.ebi.ac.uk/ega/studies/EGAS00001003298	"No access to download"
5989	SCIENCE	2016	10.1126/science.aad3503	yes u/r			NCBI/ENA/DDBJ	https://www.ebi.ac.uk/ega/dacs/EGAC00001000430	"No access to download"
5990	SCIENCE	2016	10.1126/science.aad3369	yes u/r			NCBI/ENA/DDBJ	https://www.ebi.ac.uk/ega/studies/EGAS00001001704	"No access to download"
1099	NATURE	2018	10.1038/s41586-018-0617-x	yes u/r			NCBI/ENA/DDBJ	https://www.ncbi.nlm.nih.gov/projects/gap/cgi-bin/study.cgi?study_id=phs001443.v1.p1	"Authorized access"
